# Supplementary material for: Mind the Gap: Accounting for Measurement Error and Misclassification in Variables Generated via Data Mining
Source: Atypon-hosted journal article supplement (doi:10.1287/isre.2017.0727), 2018-01-29
Supplement: isre.2017.0727-sm.pdf [file isre.2017.0727-sm.pdf]

## ONLINE SUPPLEMENT

### Appendix A1: Proof for estimation bias in linear regression with a single misclassified regressor (for reference, see Gustafson 2003).

Suppose the regression equation is  $Y = \beta_0 + \beta_1 X + \varepsilon$ . Instead of true value  $X$  we observe  $\hat{X}$ , which has misclassification. According to law of iterative expectation,  $E(Y|\hat{X}) = E(E(Y|X, \hat{X})|\hat{X})$ . Additionally, the nondifferential misclassification assumption implies that  $E(Y|X, \hat{X}) = E(Y|X)$ . Combining them together, we have the following relationship:

$$E(Y|\hat{X}) = E(E(Y|X)|\hat{X}) = E(\beta_0 + \beta_1 X|\hat{X}) = \beta_0 + \beta_1 E(X|\hat{X})$$

Therefore,  $E(\hat{\beta}_1|\hat{X}) = E(Y|\hat{X} = 1) - E(Y|\hat{X} = 0) = \beta_1[E(X|\hat{X} = 1) - E(X|\hat{X} = 0)]$

Further,  $E(X|\hat{X} = 1) = 1 \times \Pr(X = 1|\hat{X} = 1) + 0 \times \Pr(X = 0|\hat{X} = 1) = \Pr(X = 1|\hat{X} = 1)$ . Similarly,  $E(X|\hat{X} = 0) = \Pr(X = 1|\hat{X} = 0)$ . As a result, we have:

$$E(\hat{\beta}_1|\hat{X}) = \beta_1[\Pr(X = 1|\hat{X} = 1) - \Pr(X = 1|\hat{X} = 0)]$$

### Appendix A2: A Graphical Illustration of Estimation Bias due to Misclassification

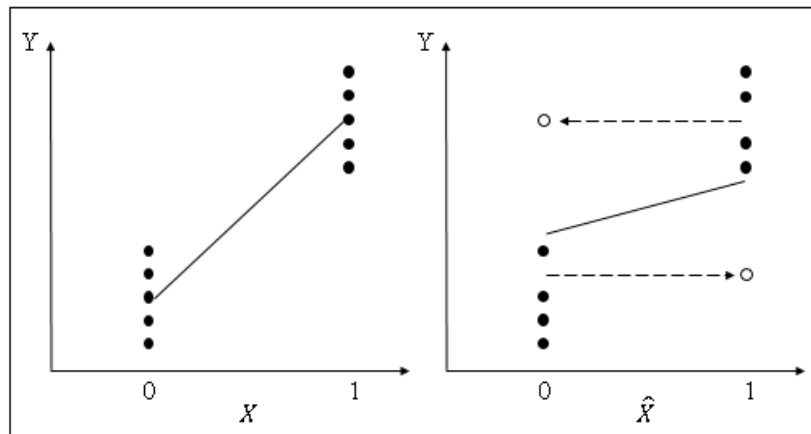

*Note.* Consider a linear regression of  $Y$  on a dummy variable  $X$ . This graph shows the fitted regression line with 10 data points. In the subgraph on the left, all data is correctly measured. In the subgraph on the right, one data point in each class is misclassified as having the opposite class label (corresponding to 80% precision for both class 0 and class 1). Change in the slope of the regression line demonstrates the bias due to misclassification in independent variable. In this case, misclassification in  $X$  would result in a coefficient that is only 60% of its true value in expectation.

**Appendix A3: Pseudocode for implementing SIMEX and MC-SIMEX methods (for reference, see Cook and Stefanski 1994 and Küchenhoff et al. 2006).**

Given a data set  $(Y, X, Z)$  and the regression model  $Y = \beta[X Z] + \varepsilon$ , we consider  $X$  to be the variable that has measurement error or misclassification, and  $Z$  to be other precisely measured variables. Here is the pseudocode for estimating error-corrected  $\beta_{simex}$  and  $\beta_{mcsimex}$ , respectively.

Algorithm A3(a). Pseudocode for Implementing SIMEX

|                                                                                                                                                                                                                                                                                                                                                                                                                                                                                                                                                                                                                                                                                                                                                                                                                                                                                                                                                                                                                         |
|-------------------------------------------------------------------------------------------------------------------------------------------------------------------------------------------------------------------------------------------------------------------------------------------------------------------------------------------------------------------------------------------------------------------------------------------------------------------------------------------------------------------------------------------------------------------------------------------------------------------------------------------------------------------------------------------------------------------------------------------------------------------------------------------------------------------------------------------------------------------------------------------------------------------------------------------------------------------------------------------------------------------------|
| <p><math>X</math> has measurement error with standard deviation <math>\sigma_e</math>, i.e., <math>X = X_{true} + e</math> and <math>Var(e) = \sigma_e^2</math></p>                                                                                                                                                                                                                                                                                                                                                                                                                                                                                                                                                                                                                                                                                                                                                                                                                                                     |
| <p>// Simulation Step:<br/>         For <math>\lambda</math> from <math>\{\lambda_1, \lambda_2, \dots, \lambda_m\}</math>: // Construct simulated data, <math>\{\lambda_1, \lambda_2, \dots, \lambda_m\}</math> can be <math>\{1, 2, \dots, m\}</math><br/>             For iteration <math>i</math> from 1 to <math>B</math>:<br/>                 Generate <math>X(\lambda)_i</math> as <math>X(\lambda)_i = X + \sqrt{\lambda_i} \sigma_e z</math>, <math>z \sim N(0, I)</math><br/>                 Assemble a new data set <math>(Y, X(\lambda)_i, Z)</math><br/>                 Estimate <math>\beta(\lambda)_i</math> from regression model<br/>             Calculate <math>\beta(\lambda) = B^{-1} \sum_{i=1}^B \beta(\lambda)_i</math></p> <p>// Extrapolation Step:<br/>         Fit a parametric model over <math>\{\beta(\lambda_1), \beta(\lambda_2), \dots, \beta(\lambda_m)\}</math><br/>         Extrapolate to <math>\beta(-1)</math><br/>         Obtain <math>\beta_{simex} = \beta(-1)</math></p> |

Algorithm A3(b). Pseudocode for Implementing MC-SIMEX

|                                                                                                                                                                                                                                                                                                                                                                                                                                                                                                                                                                                                                                                                                                                                                                                                                                                                                                                                                                                                  |
|--------------------------------------------------------------------------------------------------------------------------------------------------------------------------------------------------------------------------------------------------------------------------------------------------------------------------------------------------------------------------------------------------------------------------------------------------------------------------------------------------------------------------------------------------------------------------------------------------------------------------------------------------------------------------------------------------------------------------------------------------------------------------------------------------------------------------------------------------------------------------------------------------------------------------------------------------------------------------------------------------|
| <p><math>X</math> has misclassification, described by the misclassification matrix <math>\Pi</math>.</p>                                                                                                                                                                                                                                                                                                                                                                                                                                                                                                                                                                                                                                                                                                                                                                                                                                                                                         |
| <p>// Simulation Step:<br/>         For <math>\lambda</math> from <math>\{\lambda_1, \lambda_2, \dots, \lambda_m\}</math>: // Construct simulated data, <math>\{\lambda_1, \lambda_2, \dots, \lambda_m\}</math> can be <math>\{1, 2, \dots, m\}</math><br/>             For iteration <math>i</math> from 1 to <math>B</math>:<br/>                 Generate <math>X(\lambda)_i</math> with misclassification of magnitude <math>\Pi^{(1+\lambda)}</math><br/>                 Assemble a new data set <math>(Y, X(\lambda)_i, Z)</math><br/>                 Estimate <math>\beta(\lambda)_i</math> from regression model<br/>             Calculate <math>\beta(\lambda) = B^{-1} \sum_{i=1}^B \beta(\lambda)_i</math></p> <p>// Extrapolation Step:<br/>         Fit a parametric model over <math>\{\beta(\lambda_1), \beta(\lambda_2), \dots, \beta(\lambda_m)\}</math><br/>         Extrapolate to <math>\beta(-1)</math><br/>         Obtain <math>\beta_{mcsimex} = \beta(-1)</math></p> |

**Appendix A4: Diagnostic regression analysis for real-world example in Section 5.1.3 (N = 2,391).**

|                  | LP Model                       |                               |                               | Logit Model                    |                               |                               |
|------------------|--------------------------------|-------------------------------|-------------------------------|--------------------------------|-------------------------------|-------------------------------|
|                  | True                           | Predicted                     | Corrected                     | True                           | Predicted                     | Corrected                     |
| <i>Intercept</i> | 0.1630***<br>(0.0206)          | 0.1477***<br>(0.0216)         | 0.1746***<br>(0.0294)         | -1.6315***<br>(0.1324)         | -1.7172***<br>(0.1407)        | -1.5737***<br>(0.1811)        |
| <i>Sentiment</i> | <b>-0.0855***<br/>(0.0192)</b> | <b>-0.0628**<br/>(0.0193)</b> | <b>-0.0890**<br/>(0.0288)</b> | <b>-0.5300***<br/>(0.1227)</b> | <b>-0.3912**<br/>(0.1237)</b> | <b>-0.5304**<br/>(0.1774)</b> |
| <i>Photo</i>     | -0.02545<br>(0.0138)           | -0.0251<br>(0.0139)           | -0.0243<br>(0.0139)           | -0.1927<br>(0.1209)            | -0.1909<br>(0.1223)           | -0.1832<br>(0.1211)           |
| <i>Words</i>     | 0.9275***<br>(0.0958)          | 0.8890***<br>(0.0989)         | 0.8185***<br>(0.1044)         | 5.1059***<br>(0.6005)          | 4.8561***<br>(0.6199)         | 4.4318***<br>(0.6525)         |
| <i>Sequence</i>  | 0.0441<br>(0.0329)             | 0.0414<br>(0.0329)            | 0.0380<br>(0.0330)            | 0.2945<br>(0.2143)             | 0.2783<br>(0.2147)            | 0.2491<br>(0.2158)            |
| Log Likelihood   | -1069.4                        | -1073.9                       |                               | -1091.6                        | -1095.7                       |                               |
| AIC              | 2148.7                         | 2157.8                        |                               | 2193.2                         | 2201.4                        |                               |

*Note.* This table contains regression results using the labeled dataset, i.e., 20% (or 2,391) of all reviews.

### Appendix A5: R code used for MC-SIMEX correction in Section 5.1.3

```
library(simex) # Attach the "simex" library.

data = read.csv() # Read in the dataset that contains all variables and sentiment prediction for each review.

mc = matrix(c(0.74,0.26,0.07,0.93), nrow = 2) # Specify the misclassification matrix.
dimnames(mc) = list(c("0", "1"), c("0", "1")) # Assign the class label as dimension names of the misclassification
matrix.

# Running linear regressions. Specify the "family" parameter in glm() to run other types of regressions.
# First, run a linear regression with true values of sentiment and control variables.
# Please note that this step typically does not exist in actual studies, because true values are not observed.
model.t = glm(helpfulness ~ true_sentiment + control_variables, data = data)
summary(model.t)

# Second, run a linear regression with predicted values of sentiment and control variables.
model.mc = glm(helpfulness ~ predicted_sentiment + control_variables, data = data)
summary(model.mc)

# Third, specify the regression that contains misclassification. Specify parameters "x = T, y = T" to inform glm() to
# return the response vector and model matrix used in model fitting.
naive = glm(helpfulness ~ predicted_sentiment + control_variables, data = data, x = T, y = T)

# Finally, perform MC-SIMEX correction by calling the mcsimex() function. The first input is the regression with
# misclassification. The second parameter "SIMEXvariable" specifies the name of the variable with error. The third
# parameter "mc.matrix" specifies the misclassification matrix. For other parameters, please see the manual for
# mcsimex() function.
model.simex = mcsimex(naive, SIMEXvariable = " predicted_sentiment ", mc.matrix = mc)
summary(model.simex)
```

**Appendix A6: Additional analyses for real-world example in Section 5.1.3 with different sample sizes.**

Table A6(a). Regression Results and Corrections of the TripAdvisor.com Dataset (N = 500)

|                  | LP Model                          |                                   |                                   | Logit Model                       |                                   |                                   |
|------------------|-----------------------------------|-----------------------------------|-----------------------------------|-----------------------------------|-----------------------------------|-----------------------------------|
|                  | True                              | Predicted                         | Corrected                         | True                              | Predicted                         | Corrected                         |
| <i>Intercept</i> | 0.1482***<br>(0.0430)             | 0.1074*<br>(0.0482)               | 0.1158<br>(0.0702)                | -1.7203***<br>(0.2862)            | -1.9786***<br>(0.3364)            | -1.8926***<br>(0.4592)            |
| <i>Sentiment</i> | <b>-0.0692</b><br><b>(0.0408)</b> | <b>-0.0162</b><br><b>(0.0431)</b> | <b>-0.0244</b><br><b>(0.0702)</b> | <b>-0.4655</b><br><b>(0.2731)</b> | <b>-0.1079</b><br><b>(0.2964)</b> | <b>-0.1978</b><br><b>(0.4594)</b> |
| <i>Photo</i>     | 0.0441<br>(0.0319)                | 0.0413<br>(0.0319)                | 0.0412<br>(0.0395)                | 0.2555<br>(0.1852)                | 0.2344<br>(0.1845)                | 0.2360<br>(0.1786)                |
| <i>Words</i>     | 0.9571***<br>(0.2257)             | 0.9742***<br>(0.2342)             | 0.9510**<br>(0.2900)              | 5.5621***<br>(1.4218)             | 5.6385***<br>(1.4910)             | 5.4612***<br>(1.6467)             |
| <i>Sequence</i>  | -0.0394<br>(0.0761)               | -0.0503<br>(0.0760)               | -0.0493<br>(0.0838)               | -0.3060<br>(0.5785)               | -0.3873<br>(0.5769)               | -0.3756<br>(0.6726)               |
| Log Likelihood   | -212.49                           | -213.86                           |                                   | -220.73                           | -222.06                           |                                   |
| AIC              | 436.97                            | 439.72                            |                                   | 451.45                            | 454.12                            |                                   |

Note. The MC-SIMEX method does not provide log likelihood or AIC statistics.

\*\*\*  $p < 0.001$ , \*\*  $p < 0.01$ , \*  $p < 0.05$ , +  $p < 0.1$

Table A6(b). Regression Results and Corrections of the TripAdvisor.com Dataset (N = 2,000)

|                  | LP Model                             |                                    |                                    | Logit Model                          |                                    |                                    |
|------------------|--------------------------------------|------------------------------------|------------------------------------|--------------------------------------|------------------------------------|------------------------------------|
|                  | True                                 | Predicted                          | Corrected                          | True                                 | Predicted                          | Corrected                          |
| <i>Intercept</i> | 0.1763***<br>(0.0232)                | 0.1452***<br>(0.0245)              | 0.1660***<br>(0.0353)              | -1.5464***<br>(0.1447)               | -1.7215***<br>(0.1576)             | -1.6175***<br>(0.2109)             |
| <i>Sentiment</i> | <b>-0.0803***</b><br><b>(0.0215)</b> | <b>-0.0411+</b><br><b>(0.0219)</b> | <b>-0.0618+</b><br><b>(0.0349)</b> | <b>-0.4819***</b><br><b>(0.1330)</b> | <b>-0.2475+</b><br><b>(0.1383)</b> | <b>-0.3452+</b><br><b>(0.2065)</b> |
| <i>Photo</i>     | 0.0106<br>(0.0195)                   | 0.0074<br>(0.0195)                 | 0.0088<br>(0.0237)                 | 0.0586<br>(0.1181)                   | 0.0382<br>(0.1177)                 | 0.0475<br>(0.1332)                 |
| <i>Words</i>     | 0.7572***<br>(0.1046)                | 0.7628***<br>(0.1081)              | 0.7112***<br>(0.1439)              | 4.1086***<br>(0.6328)                | 4.1178***<br>(0.6550)              | 3.7970***<br>(0.8094)              |
| <i>Sequence</i>  | 0.0360<br>(0.0369)                   | 0.0329<br>(0.0370)                 | 0.0334<br>(0.0391)                 | 0.2475<br>(0.2379)                   | 0.2283<br>(0.2379)                 | 0.2299<br>(0.2420)                 |
| Log Likelihood   | -933.05                              | -938.22                            |                                    | -942.67                              | -947.42                            |                                    |
| AIC              | 1878.10                              | 1888.40                            |                                    | 1895.30                              | 1904.80                            |                                    |

Note. The MC-SIMEX method does not provide log likelihood or AIC statistics.

\*\*\*  $p < 0.001$ , \*\*  $p < 0.01$ , \*  $p < 0.05$ , +  $p < 0.1$

Table A6(c). Regression Results and Corrections of the TripAdvisor.com Dataset (N = 5,000)

|                  | LP Model                             |                                     |                                     | Logit Model                          |                                     |                                     |
|------------------|--------------------------------------|-------------------------------------|-------------------------------------|--------------------------------------|-------------------------------------|-------------------------------------|
|                  | True                                 | Predicted                           | Corrected                           | True                                 | Predicted                           | Corrected                           |
| <i>Intercept</i> | 0.1648***<br>(0.0146)                | 0.1507***<br>(0.0154)               | 0.1739***<br>(0.0229)               | -1.6065***<br>(0.0931)               | -1.6878***<br>(0.0998)              | -1.5641***<br>(0.1346)              |
| <i>Sentiment</i> | <b>-0.0611***</b><br><b>(0.0135)</b> | <b>-0.0416**</b><br><b>(0.0137)</b> | <b>-0.0651**</b><br><b>(0.0222)</b> | <b>-0.3740***</b><br><b>(0.0848)</b> | <b>-0.2544**</b><br><b>(0.0869)</b> | <b>-0.3770**</b><br><b>(0.1293)</b> |
| <i>Photo</i>     | -0.0255*<br>(0.0107)                 | -0.0258*<br>(0.0107)                | -0.0250**<br>(0.0095)               | -0.1986*<br>(0.0902)                 | -0.2008*<br>(0.0902)                | -0.1928*<br>(0.0924)                |
| <i>Words</i>     | 0.8948***<br>(0.0703)                | 0.8834***<br>(0.0725)               | 0.8267***<br>(0.0938)               | 4.9458***<br>(0.4312)                | 4.8607***<br>(0.4457)               | 4.5130***<br>(0.5312)               |
| <i>Sequence</i>  | -0.0353<br>(0.0228)                  | -0.0385+<br>(0.0228)                | -0.0379<br>(0.0235)                 | -0.2197<br>(0.1581)                  | -0.2402<br>(0.1582)                 | -0.2405<br>(0.1682)                 |
| Log Likelihood   | -2315.62                             | -2321.24                            |                                     | -2343.63                             | -2348.86                            |                                     |
| AIC              | 4643.20                              | 4654.50                             |                                     | 4697.30                              | 4707.70                             |                                     |

Note. The MC-SIMEX method does not provide log likelihood or AIC statistics.

\*\*\*  $p < 0.001$ , \*\*  $p < 0.01$ , \*  $p < 0.05$ , +  $p < 0.1$

**Appendix A7: Diagnostic regression analysis for real-world example in Section 5.2 (N = 806).**

|                         | OLS Model                     |                             |                              | Poisson Model                  |                              |                             |
|-------------------------|-------------------------------|-----------------------------|------------------------------|--------------------------------|------------------------------|-----------------------------|
|                         | True                          | Predicted                   | Corrected                    | True                           | Predicted                    | Corrected                   |
| <i>Intercept</i>        | -0.6257<br>(1.0350)           | -1.0333<br>(1.0275)         | -0.8095<br>(1.0407)          | -1.6350***<br>(0.3082)         | -1.7096***<br>(0.3092)       | -1.6102***<br>(0.3393)      |
| <i>Log(Words)</i>       | 0.3575***<br>(0.0886)         | 0.3945***<br>(0.0909)       | 0.3308**<br>(0.1018)         | 0.4494***<br>(0.0253)          | 0.4628***<br>(0.0266)        | 0.4310***<br>(0.0431)       |
| <i>Activeness</i>       | 0.0676***<br>(0.0122)         | 0.0662***<br>(0.0122)       | 0.0654***<br>(0.0122)        | 0.0150***<br>(0.0033)          | 0.0144***<br>(0.0033)        | 0.0150***<br>(0.0034)       |
| <i>Log(Popularity)</i>  | 0.1167<br>(0.1003)            | 0.1369<br>(0.1007)          | 0.1434<br>(0.1008)           | 0.0668*<br>(0.0307)            | 0.0647*<br>(0.0308)          | 0.0711*<br>(0.0313)         |
| <i>Type = Link</i>      | -0.9259<br>(0.6966)           | -1.0160<br>(0.6999)         | -1.0751<br>(0.7000)          | -1.2153*<br>(0.5009)           | -1.1987*<br>(0.5009)         | -1.2049*<br>(0.5019)        |
| <i>Type = Photo</i>     | 0.0768<br>(0.5452)            | -0.1046<br>(0.5435)         | 0.0371<br>(0.5519)           | -0.6038*<br>(0.2769)           | -0.7347**<br>(0.2755)        | -0.6800*<br>(0.2875)        |
| <b><i>Sentiment</i></b> | <b>-0.6690**<br/>(0.2114)</b> | <b>-0.4113<br/>(0.2217)</b> | <b>-0.6430*<br/>(0.2982)</b> | <b>-0.3272***<br/>(0.0713)</b> | <b>-0.1578*<br/>(0.0803)</b> | <b>-0.3514<br/>(0.2873)</b> |
| Log Likelihood          | -1905.6                       | -1908.9                     |                              | -2290.4                        | -2299.5                      |                             |
| AIC                     | 3825.2                        | 3831.8                      |                              | 4594.7                         | 4613.0                       |                             |

*Note.* This table contains regression results using the labeled dataset, i.e., 30% (or 410) of all profile pictures. In our diagnostic analysis, the dummy variable *Type = Video* was not estimated, because no video-typed post was selected into the 30% random sample.

## Appendix A8: Additional comprehensive simulation analyses of SIMEX and MC-SIMEX

### corrections

1)  $X_1$  follows  $N(0,1^2)$  and has measurement error with  $\sigma_e = 0.1$ ;  $X_2$  follows uniform distribution with values in  $[-0.5,0.5]$ ,  $[-1,1]$ , or  $[-2,2]$ ;  $X_3$  follows normal distribution with standard deviation 0.5, 1, or 2.

|                                                                   | OLS    |        |       |             | Logit  |        |       |             | Probit |        |       |             | Poisson |        |        |             |
|-------------------------------------------------------------------|--------|--------|-------|-------------|--------|--------|-------|-------------|--------|--------|-------|-------------|---------|--------|--------|-------------|
|                                                                   | $b$    | $b'$   | %     | $b_{simex}$ | $b$    | $b'$   | %     | $b_{simex}$ | $b$    | $b'$   | %     | $b_{simex}$ | $b$     | $b'$   | %      | $b_{simex}$ |
| $\sigma_e = 0.1, X_2 \sim Uniform(-0.5,0.5), X_3 \sim N(0,0.5^2)$ |        |        |       |             |        |        |       |             |        |        |       |             |         |        |        |             |
| $C$                                                               | 1.0065 | 1.0045 | -0.2% | 1.0065      | 1.0832 | 1.0794 | -0.3% | 1.0861      | 0.9637 | 0.9423 | -2.2% | 0.9632      | 1.0062  | 0.9509 | -5.5%  | 0.9254      |
| $X_1$                                                             | 2.0000 | 1.9787 | -1.1% | 2.0005      | 2.0166 | 1.9825 | -1.7% | 2.0147      | 1.9941 | 1.9339 | -3.0% | 1.9965      | 1.9990  | 2.0204 | 1.1%   | 2.0448      |
| $X_2$                                                             | 3.0160 | 3.0123 | -0.1% | 3.0111      | 3.1825 | 3.1640 | -0.6% | 3.1885      | 2.8510 | 2.7942 | -2.0% | 2.8522      | 2.9919  | 3.1150 | 4.1%   | 3.0957      |
| $X_3$                                                             | 0.5273 | 0.5253 | -0.4% | 0.5271      | 0.5902 | 0.5719 | -3.1% | 0.5758      | 0.3645 | 0.3565 | -2.2% | 0.3674      | 0.5001  | 0.5375 | 7.5%   | 0.5403      |
| $\sigma_e = 0.1, X_2 \sim Uniform(-0.5,0.5), X_3 \sim N(0,1^2)$   |        |        |       |             |        |        |       |             |        |        |       |             |         |        |        |             |
| $C$                                                               | 0.9873 | 0.9862 | -0.1% | 0.9855      | 1.0374 | 1.0345 | -0.3% | 1.0391      | 1.0456 | 1.0146 | -3.0% | 1.0334      | 0.9921  | 1.0034 | 1.1%   | 0.9866      |
| $X_1$                                                             | 2.0006 | 1.9802 | -1.0% | 2.0013      | 1.9601 | 1.9379 | -1.1% | 1.9684      | 2.0345 | 1.9576 | -3.8% | 2.0154      | 2.0035  | 1.9810 | -1.1%  | 2.0028      |
| $X_2$                                                             | 3.0168 | 3.0084 | -0.3% | 3.0071      | 2.6864 | 2.6836 | -0.1% | 2.7044      | 3.1959 | 3.0908 | -3.3% | 3.1469      | 3.0014  | 3.0126 | 0.4%   | 2.9711      |
| $X_3$                                                             | 0.4954 | 0.4946 | -0.2% | 0.4965      | 0.4914 | 0.4898 | -0.3% | 0.4915      | 0.4696 | 0.4604 | -2.0% | 0.4688      | 0.4992  | 0.5210 | 4.4%   | 0.5208      |
| $\sigma_e = 0.1, X_2 \sim Uniform(-0.5,0.5), X_3 \sim N(0,2^2)$   |        |        |       |             |        |        |       |             |        |        |       |             |         |        |        |             |
| $C$                                                               | 0.9975 | 0.9986 | 0.1%  | 1.0001      | 0.9911 | 0.9869 | -0.4% | 0.9958      | 0.9358 | 0.9102 | -2.7% | 0.9260      | 1.0047  | 1.0552 | 5.0%   | 1.0201      |
| $X_1$                                                             | 1.9911 | 1.9706 | -1.0% | 1.9903      | 1.9506 | 1.9168 | -1.7% | 1.9541      | 1.9689 | 1.8935 | -3.8% | 1.9461      | 1.9994  | 1.9623 | -1.9%  | 1.9878      |
| $X_2$                                                             | 2.9638 | 2.9682 | 0.1%  | 2.9744      | 3.1581 | 3.1270 | -1.0% | 3.1513      | 3.0797 | 3.0064 | -2.4% | 3.0583      | 3.0041  | 3.0054 | 0.0%   | 3.0264      |
| $X_3$                                                             | 0.4968 | 0.4957 | -0.2% | 0.4957      | 0.4997 | 0.4951 | -0.9% | 0.4989      | 0.5255 | 0.5087 | -3.2% | 0.5172      | 0.4996  | 0.4902 | -1.9%  | 0.4959      |
| $\sigma_e = 0.1, X_2 \sim Uniform(-1,1), X_3 \sim N(0,0.5^2)$     |        |        |       |             |        |        |       |             |        |        |       |             |         |        |        |             |
| $C$                                                               | 1.0028 | 1.0012 | -0.2% | 1.0011      | 0.9172 | 0.9128 | -0.5% | 0.9190      | 1.0159 | 1.0059 | -1.0% | 1.0286      | 1.0013  | 1.0157 | 1.4%   | 1.0128      |
| $X_1$                                                             | 1.9988 | 1.9801 | -0.9% | 2.0001      | 1.9423 | 1.9147 | -1.4% | 1.9469      | 2.1310 | 2.0928 | -1.8% | 2.1611      | 1.9994  | 1.9692 | -1.5%  | 1.9882      |
| $X_2$                                                             | 2.9930 | 2.9970 | 0.1%  | 2.9954      | 2.8003 | 2.7808 | -0.7% | 2.8001      | 3.1071 | 3.0776 | -0.9% | 3.1428      | 3.0038  | 3.0422 | 1.3%   | 3.0196      |
| $X_3$                                                             | 0.4699 | 0.4677 | -0.5% | 0.4665      | 0.4628 | 0.4476 | -3.3% | 0.4486      | 0.5138 | 0.5154 | 0.3%  | 0.5228      | 0.4971  | 0.4848 | -2.5%  | 0.4525      |
| $\sigma_e = 0.1, X_2 \sim Uniform(-1,1), X_3 \sim N(0,1^2)$       |        |        |       |             |        |        |       |             |        |        |       |             |         |        |        |             |
| $C$                                                               | 1.0051 | 1.0038 | -0.1% | 1.0045      | 1.0379 | 1.0282 | -0.9% | 1.0363      | 1.0044 | 0.9787 | -2.6% | 0.9980      | 0.9927  | 1.0724 | 8.0%   | 1.0458      |
| $X_1$                                                             | 2.0113 | 1.9953 | -0.8% | 2.0132      | 2.0396 | 2.0134 | -1.3% | 2.0498      | 2.0249 | 1.9620 | -3.1% | 2.0202      | 2.0000  | 1.9116 | -4.4%  | 1.9333      |
| $X_2$                                                             | 3.0033 | 3.0054 | 0.1%  | 3.0070      | 2.9796 | 2.9613 | -0.6% | 2.9861      | 2.9419 | 2.8767 | -2.2% | 2.9393      | 3.0094  | 3.0756 | 2.2%   | 3.0886      |
| $X_3$                                                             | 0.5064 | 0.4991 | -1.5% | 0.4987      | 0.4732 | 0.4687 | -1.0% | 0.4705      | 0.4975 | 0.4858 | -2.3% | 0.4937      | 0.5041  | 0.4816 | -4.4%  | 0.4829      |
| $\sigma_e = 0.1, X_2 \sim Uniform(-1,1), X_3 \sim N(0,2^2)$       |        |        |       |             |        |        |       |             |        |        |       |             |         |        |        |             |
| $C$                                                               | 1.0016 | 1.0025 | 0.1%  | 1.0029      | 1.0670 | 1.0484 | -1.7% | 1.0565      | 0.9671 | 0.9433 | -2.5% | 0.9629      | 1.0086  | 1.0456 | 3.7%   | 1.0227      |
| $X_1$                                                             | 2.0095 | 1.9899 | -1.0% | 2.0104      | 1.9724 | 1.9246 | -2.4% | 1.9589      | 1.8920 | 1.8259 | -3.5% | 1.8786      | 1.9972  | 1.9801 | -0.9%  | 2.0018      |
| $X_2$                                                             | 3.0077 | 3.0123 | 0.2%  | 3.0134      | 3.0369 | 2.9944 | -1.4% | 3.0152      | 2.8143 | 2.7539 | -2.1% | 2.8061      | 2.9942  | 2.9822 | -0.4%  | 2.9801      |
| $X_3$                                                             | 0.4981 | 0.5004 | 0.4%  | 0.5004      | 0.4919 | 0.4847 | -1.5% | 0.4878      | 0.4659 | 0.4570 | -1.9% | 0.4646      | 0.4999  | 0.4955 | -0.9%  | 0.4939      |
| $\sigma_e = 0.1, X_2 \sim Uniform(-2,2), X_3 \sim N(0,0.5^2)$     |        |        |       |             |        |        |       |             |        |        |       |             |         |        |        |             |
| $C$                                                               | 1.0025 | 1.0022 | -0.0% | 1.0011      | 1.0375 | 1.0326 | -0.5% | 1.0371      | 1.0067 | 0.9927 | -1.4% | 1.0121      | 1.0044  | 0.9513 | -5.3%  | 0.9589      |
| $X_1$                                                             | 1.9857 | 1.9616 | -1.2% | 1.9812      | 1.9876 | 1.9528 | -1.8% | 1.9803      | 1.9189 | 1.8886 | -1.6% | 1.9435      | 1.9992  | 1.9922 | -0.4%  | 2.0019      |
| $X_2$                                                             | 3.0021 | 2.9983 | -0.1% | 2.9995      | 2.9292 | 2.9137 | -0.5% | 2.9285      | 2.9758 | 2.9521 | -0.8% | 3.0087      | 2.9985  | 3.0363 | 1.3%   | 3.0276      |
| $X_3$                                                             | 0.5036 | 0.5024 | -0.2% | 0.5008      | 0.6771 | 0.6668 | -1.5% | 0.6701      | 0.5430 | 0.5391 | -0.7% | 0.5514      | 0.4984  | 0.4769 | -4.3%  | 0.4486      |
| $\sigma_e = 0.1, X_2 \sim Uniform(-2,2), X_3 \sim N(0,1^2)$       |        |        |       |             |        |        |       |             |        |        |       |             |         |        |        |             |
| $C$                                                               | 0.9960 | 1.0000 | 0.4%  | 0.9985      | 1.0450 | 1.0331 | -1.1% | 1.0391      | 1.0413 | 1.0078 | -3.2% | 1.0265      | 1.0020  | 0.9815 | -2.0%  | 0.8705      |
| $X_1$                                                             | 2.0191 | 2.0016 | -0.9% | 2.0229      | 1.9578 | 1.9299 | -1.4% | 1.9635      | 2.0390 | 1.9640 | -3.7% | 2.0228      | 1.9995  | 2.0255 | 1.3%   | 2.0418      |
| $X_2$                                                             | 2.9925 | 2.9913 | -0.0% | 2.9910      | 2.9351 | 2.9200 | -0.5% | 2.9381      | 2.9607 | 2.8774 | -2.8% | 2.9308      | 2.9990  | 2.9895 | -0.3%  | 3.0494      |
| $X_3$                                                             | 0.4909 | 0.4931 | 0.4%  | 0.4928      | 0.5290 | 0.5317 | 0.5%  | 0.5355      | 0.4750 | 0.4594 | -3.3% | 0.4664      | 0.5005  | 0.4883 | -2.4%  | 0.4912      |
| $\sigma_e = 0.1, X_2 \sim Uniform(-2,2), X_3 \sim N(0,2^2)$       |        |        |       |             |        |        |       |             |        |        |       |             |         |        |        |             |
| $C$                                                               | 1.0108 | 1.0092 | -0.2% | 1.0097      | 0.8989 | 0.9018 | 0.3%  | 0.9082      | 0.9662 | 0.9488 | -1.8% | 0.9673      | 0.9985  | 0.8443 | -15.4% | 0.8822      |
| $X_1$                                                             | 1.9972 | 1.9754 | -1.1% | 1.9957      | 2.0375 | 2.0129 | -1.2% | 2.0501      | 2.0459 | 1.9764 | -3.4% | 2.0360      | 1.9998  | 1.9692 | -1.5%  | 1.9908      |
| $X_2$                                                             | 3.0057 | 3.0056 | -0.0% | 3.0056      | 3.0528 | 3.0448 | -0.3% | 3.0689      | 3.0410 | 2.9661 | -2.5% | 3.0233      | 3.0015  | 3.0902 | 3.0%   | 3.0483      |
| $X_3$                                                             | 0.4992 | 0.5015 | 0.5%  | 0.5015      | 0.5365 | 0.5327 | -0.7% | 0.5365      | 0.5245 | 0.5097 | -2.8% | 0.5186      | 0.4997  | 0.5221 | 4.5%   | 0.5193      |

2)  $X_1$  follows  $N(0,1^2)$  and has measurement error with  $\sigma_e = 0.3$ ;  $X_2$  follows uniform distribution with values in  $[-0.5,0.5]$ ,  $[-1,1]$ , or  $[-2,2]$ ;  $X_3$  follows normal distribution with standard deviation 0.5, 1, or 2.

|                                                                    | OLS    |        |       |             | Logit  |        |        |             | Probit |        |        |             | Poisson |        |        |             |
|--------------------------------------------------------------------|--------|--------|-------|-------------|--------|--------|--------|-------------|--------|--------|--------|-------------|---------|--------|--------|-------------|
|                                                                    | $b$    | $b'$   | %     | $b_{simex}$ | $b$    | $b'$   | %      | $b_{simex}$ | $b$    | $b'$   | %      | $b_{simex}$ | $b$     | $b'$   | %      | $b_{simex}$ |
| $\sigma_e = 0.3, X_2 \sim Uniform(-0.5,0.5), X_3 \sim N(0, 0.5^2)$ |        |        |       |             |        |        |        |             |        |        |        |             |         |        |        |             |
| $C$                                                                | 0.9940 | 0.9923 | -0.2% | 0.9920      | 1.0605 | 0.9989 | -5.8%  | 1.0529      | 0.9706 | 0.8570 | -11.7% | 0.9590      | 1.0026  | 1.1853 | 18.2%  | 1.1086      |
| $X_1$                                                              | 1.9943 | 1.8405 | -7.7% | 2.0027      | 2.0061 | 1.7093 | -14.8% | 1.9446      | 1.9188 | 1.5365 | -19.9% | 1.8454      | 1.9964  | 1.8470 | -7.5%  | 1.9675      |
| $X_2$                                                              | 2.9865 | 2.9821 | -0.1% | 2.9818      | 3.0686 | 2.8958 | -5.6%  | 3.0462      | 2.9410 | 2.5433 | -13.5% | 2.8142      | 3.0233  | 2.8856 | -4.6%  | 2.8130      |
| $X_3$                                                              | 0.5026 | 0.5049 | 0.4%  | 0.5100      | 0.6219 | 0.5815 | -6.5%  | 0.6032      | 0.4376 | 0.3707 | -15.3% | 0.4184      | 0.4900  | 0.4892 | -0.2%  | 0.5971      |
| $\sigma_e = 0.3, X_2 \sim Uniform(-0.5,0.5), X_3 \sim N(0, 1^2)$   |        |        |       |             |        |        |        |             |        |        |        |             |         |        |        |             |
| $C$                                                                | 0.9905 | 0.9868 | -0.4% | 0.9926      | 1.0296 | 0.9642 | -6.4%  | 1.0259      | 0.9938 | 0.8636 | -13.1% | 0.9799      | 0.9946  | 1.1455 | 15.2%  | 0.9520      |
| $X_1$                                                              | 2.0071 | 1.8358 | -8.5% | 1.9959      | 2.1288 | 1.8301 | -14.0% | 2.1023      | 2.0367 | 1.6444 | -19.3% | 2.0122      | 2.0010  | 1.8636 | -6.9%  | 2.0462      |
| $X_2$                                                              | 2.9908 | 2.9692 | -0.7% | 2.9797      | 3.1944 | 3.0430 | -4.7%  | 3.2415      | 3.1744 | 2.7253 | -14.1% | 3.0625      | 3.0073  | 2.8791 | -4.3%  | 2.9639      |
| $X_3$                                                              | 0.5008 | 0.4950 | -1.2% | 0.4936      | 0.5348 | 0.5040 | -5.8%  | 0.5302      | 0.4986 | 0.4223 | -15.3% | 0.4790      | 0.5004  | 0.5142 | 2.8%   | 0.4999      |
| $\sigma_e = 0.3, X_2 \sim Uniform(-0.5,0.5), X_3 \sim N(0, 2^2)$   |        |        |       |             |        |        |        |             |        |        |        |             |         |        |        |             |
| $C$                                                                | 1.0005 | 1.0029 | 0.2%  | 1.0043      | 0.9831 | 0.9129 | -7.1%  | 0.9592      | 1.0456 | 0.9119 | -12.8% | 1.0301      | 1.0057  | 1.3885 | 38.1%  | 1.2347      |
| $X_1$                                                              | 1.9893 | 1.8385 | -7.6% | 1.9968      | 2.0681 | 1.7588 | -15.0% | 1.9930      | 2.0686 | 1.6345 | -21.0% | 1.9848      | 1.9995  | 1.7139 | -14.3% | 1.8671      |
| $X_2$                                                              | 3.0005 | 3.0255 | 0.8%  | 3.0123      | 3.0007 | 2.8198 | -6.0%  | 2.9726      | 3.2285 | 2.7866 | -13.7% | 3.1125      | 2.9952  | 2.8001 | -6.5%  | 2.7360      |
| $X_3$                                                              | 0.5001 | 0.4966 | -0.7% | 0.4975      | 0.5399 | 0.5027 | -6.9%  | 0.5270      | 0.5375 | 0.4728 | -12.0% | 0.5281      | 0.4973  | 0.4658 | -6.3%  | 0.4792      |
| $\sigma_e = 0.3, X_2 \sim Uniform(-1,1), X_3 \sim N(0, 0.5^2)$     |        |        |       |             |        |        |        |             |        |        |        |             |         |        |        |             |
| $C$                                                                | 0.9881 | 0.9788 | -0.9% | 0.9787      | 0.9673 | 0.9074 | -6.2%  | 0.9584      | 1.0042 | 0.8633 | -14.0% | 0.9682      | 0.9850  | 1.0552 | 7.1%   | 0.7100      |
| $X_1$                                                              | 1.9982 | 1.8319 | -8.3% | 1.9896      | 2.0903 | 1.8095 | -13.4% | 2.0671      | 1.9876 | 1.5649 | -21.3% | 1.8876      | 2.0089  | 1.8756 | -6.6%  | 2.1399      |
| $X_2$                                                              | 2.9870 | 2.9713 | -0.5% | 2.9752      | 3.0840 | 2.8899 | -6.3%  | 3.0434      | 2.9213 | 2.5272 | -13.5% | 2.8122      | 2.9963  | 3.0567 | 2.0%   | 3.1687      |
| $X_3$                                                              | 0.4890 | 0.5052 | 3.3%  | 0.5158      | 0.5650 | 0.5644 | -0.1%  | 0.5934      | 0.6070 | 0.5117 | -15.7% | 0.5734      | 0.5006  | 0.5669 | 13.2%  | 0.6125      |
| $\sigma_e = 0.3, X_2 \sim Uniform(-1,1), X_3 \sim N(0, 1^2)$       |        |        |       |             |        |        |        |             |        |        |        |             |         |        |        |             |
| $C$                                                                | 0.9990 | 0.9865 | -1.3% | 0.9850      | 1.0161 | 0.9513 | -6.4%  | 0.9951      | 0.9294 | 0.8006 | -13.9% | 0.8934      | 1.0057  | 1.2848 | 27.7%  | 1.0802      |
| $X_1$                                                              | 1.9855 | 1.8269 | -8.0% | 1.9804      | 2.0482 | 1.7566 | -14.2% | 2.0044      | 1.9135 | 1.5363 | -19.7% | 1.8556      | 1.9968  | 1.7473 | -12.5% | 1.9305      |
| $X_2$                                                              | 3.0081 | 3.0029 | -0.2% | 3.0065      | 2.9901 | 2.8128 | -5.9%  | 2.9596      | 2.8597 | 2.4955 | -12.7% | 2.7929      | 3.0024  | 3.0009 | -0.0%  | 3.0108      |
| $X_3$                                                              | 0.4998 | 0.4805 | -3.9% | 0.4833      | 0.4659 | 0.4281 | -8.1%  | 0.4499      | 0.4806 | 0.4118 | -14.3% | 0.4598      | 0.5010  | 0.4673 | -6.7%  | 0.5026      |
| $\sigma_e = 0.3, X_2 \sim Uniform(-1,1), X_3 \sim N(0, 2^2)$       |        |        |       |             |        |        |        |             |        |        |        |             |         |        |        |             |
| $C$                                                                | 1.0011 | 1.0020 | 0.1%  | 0.9970      | 0.9557 | 0.9163 | -4.1%  | 0.9711      | 0.9934 | 0.8877 | -10.6% | 1.0066      | 0.9933  | 1.1814 | 18.9%  | 0.9229      |
| $X_1$                                                              | 2.0019 | 1.8318 | -8.5% | 1.9807      | 1.9388 | 1.7314 | -10.7% | 1.9460      | 2.0543 | 1.6834 | -18.1% | 2.0502      | 1.9996  | 1.7675 | -11.6% | 1.9415      |
| $X_2$                                                              | 2.9902 | 2.9919 | 0.1%  | 2.9840      | 2.9482 | 2.8373 | -3.8%  | 2.9635      | 3.1522 | 2.8278 | -10.3% | 3.1976      | 3.0042  | 2.9591 | -1.5%  | 2.9892      |
| $X_3$                                                              | 0.4990 | 0.5016 | 0.5%  | 0.5043      | 0.5004 | 0.4761 | -4.9%  | 0.4997      | 0.4923 | 0.4363 | -11.4% | 0.4932      | 0.5018  | 0.5501 | 9.6%   | 0.5815      |
| $\sigma_e = 0.3, X_2 \sim Uniform(-2,2), X_3 \sim N(0, 0.5^2)$     |        |        |       |             |        |        |        |             |        |        |        |             |         |        |        |             |
| $C$                                                                | 1.0064 | 1.0134 | 0.7%  | 1.0102      | 1.1316 | 1.0763 | -4.9%  | 1.1166      | 1.0071 | 0.8799 | -12.6% | 0.9941      | 1.0006  | 0.2396 | -76.0% | -0.1209     |
| $X_1$                                                              | 1.9954 | 1.8231 | -8.6% | 1.9715      | 2.0540 | 1.8012 | -12.3% | 2.0367      | 2.1239 | 1.6866 | -20.6% | 2.0446      | 1.9999  | 1.9125 | -4.4%  | 2.0792      |
| $X_2$                                                              | 2.9947 | 2.9925 | -0.1% | 2.9899      | 3.0985 | 2.9573 | -4.6%  | 3.0814      | 3.1193 | 2.7045 | -13.3% | 3.0572      | 2.9993  | 3.5035 | 16.8%  | 3.5972      |
| $X_3$                                                              | 0.5087 | 0.5060 | -0.5% | 0.4995      | 0.4603 | 0.4340 | -5.7%  | 0.4713      | 0.3441 | 0.2551 | -25.9% | 0.2787      | 0.5018  | 0.5895 | 17.5%  | 0.6339      |
| $\sigma_e = 0.3, X_2 \sim Uniform(-2,2), X_3 \sim N(0, 1^2)$       |        |        |       |             |        |        |        |             |        |        |        |             |         |        |        |             |
| $C$                                                                | 0.9976 | 0.9987 | 0.1%  | 0.9977      | 1.0285 | 1.0081 | -2.0%  | 1.0529      | 0.8567 | 0.7388 | -13.8% | 0.8304      | 1.0035  | 1.1600 | 15.6%  | 0.9501      |
| $X_1$                                                              | 1.9955 | 1.8295 | -8.3% | 1.9914      | 1.9746 | 1.7600 | -10.9% | 1.9894      | 1.9315 | 1.6029 | -17.0% | 1.9494      | 2.0008  | 1.8049 | -9.8%  | 2.0204      |
| $X_2$                                                              | 2.9996 | 3.0095 | 0.3%  | 3.0120      | 2.9730 | 2.8552 | -4.0%  | 2.9907      | 2.7894 | 2.4684 | -11.5% | 2.7876      | 2.9969  | 3.0168 | 0.7%   | 3.0043      |
| $X_3$                                                              | 0.4944 | 0.5016 | 1.5%  | 0.5019      | 0.5237 | 0.4926 | -5.9%  | 0.5177      | 0.4741 | 0.4227 | -10.8% | 0.4851      | 0.5004  | 0.5011 | 0.1%   | 0.5501      |
| $\sigma_e = 0.3, X_2 \sim Uniform(-2,2), X_3 \sim N(0, 2^2)$       |        |        |       |             |        |        |        |             |        |        |        |             |         |        |        |             |
| $C$                                                                | 1.0082 | 0.9996 | -0.9% | 1.0019      | 0.9604 | 0.9050 | -5.8%  | 0.9518      | 0.9914 | 0.8549 | -13.8% | 0.9660      | 0.9990  | 1.5323 | 53.4%  | 1.1906      |
| $X_1$                                                              | 2.0002 | 1.8376 | -8.1% | 1.9934      | 1.9279 | 1.6892 | -12.4% | 1.9298      | 2.0341 | 1.5790 | -22.4% | 1.9152      | 2.0007  | 1.8840 | -5.8%  | 2.0615      |
| $X_2$                                                              | 2.9973 | 3.0107 | 0.4%  | 3.0109      | 2.8274 | 2.6831 | -5.1%  | 2.8062      | 2.9988 | 2.5588 | -14.7% | 2.8867      | 2.9999  | 2.7385 | -8.7%  | 2.8270      |
| $X_3$                                                              | 0.5034 | 0.5103 | 1.4%  | 0.5094      | 0.4713 | 0.4515 | -4.2%  | 0.4700      | 0.5034 | 0.4320 | -14.2% | 0.4877      | 0.4998  | 0.4657 | -6.8%  | 0.4654      |

3)  $X_1$  follows  $N(0,1^2)$  and has measurement error with  $\sigma_e = 0.5$ ;  $X_2$  follows uniform distribution with values in  $[-0.5,0.5]$ ,  $[-1,1]$ , or  $[-2,2]$ ;  $X_3$  follows normal distribution with standard deviation 0.5, 1, or 2.

|                                                                   | OLS    |        |        |             | Logit  |        |        |             | Probit |        |        |             | Poisson |         |         |             |
|-------------------------------------------------------------------|--------|--------|--------|-------------|--------|--------|--------|-------------|--------|--------|--------|-------------|---------|---------|---------|-------------|
|                                                                   | $b$    | $b'$   | %      | $b_{simex}$ | $b$    | $b'$   | %      | $b_{simex}$ | $b$    | $b'$   | %      | $b_{simex}$ | $b$     | $b'$    | %       | $b_{simex}$ |
| $\sigma_e = 0.5, X_2 \sim Uniform(-0.5,0.5), X_3 \sim N(0,0.5^2)$ |        |        |        |             |        |        |        |             |        |        |        |             |         |         |         |             |
| $C$                                                               | 0.9988 | 0.9723 | -2.6%  | 0.9734      | 1.0373 | 0.9163 | -11.7% | 1.0022      | 1.0214 | 0.7336 | -28.2% | 0.8495      | 0.9939  | 1.3684  | 37.7%   | 0.8414      |
| $X_1$                                                             | 2.0058 | 1.5977 | -20.3% | 1.9287      | 1.9357 | 1.3828 | -28.6% | 1.8090      | 1.9786 | 1.1431 | -42.2% | 1.5498      | 2.0042  | 1.6108  | -19.6%  | 2.0838      |
| $X_2$                                                             | 3.0134 | 3.0054 | -0.3%  | 2.9922      | 2.9940 | 2.6700 | -10.8% | 2.9210      | 3.0159 | 2.2345 | -25.9% | 2.5766      | 3.0086  | 3.1850  | 5.9%    | 3.2916      |
| $X_3$                                                             | 0.4819 | 0.4512 | -6.4%  | 0.4563      | 0.4866 | 0.4111 | -15.5% | 0.4448      | 0.4927 | 0.3049 | -38.1% | 0.3429      | 0.5081  | 0.3959  | -22.1%  | 0.4806      |
| $\sigma_e = 0.5, X_2 \sim Uniform(-0.5,0.5), X_3 \sim N(0,1^2)$   |        |        |        |             |        |        |        |             |        |        |        |             |         |         |         |             |
| $C$                                                               | 0.9968 | 0.9978 | 0.1%   | 0.9982      | 0.9722 | 0.8364 | -14.0% | 0.9131      | 1.0454 | 0.7728 | -26.1% | 0.8995      | 0.9932  | 0.9931  | -0.0%   | 1.3919      |
| $X_1$                                                             | 1.9971 | 1.5859 | -20.6% | 1.9221      | 2.0029 | 1.3898 | -30.6% | 1.8082      | 1.9948 | 1.1952 | -40.1% | 1.6425      | 2.0009  | 1.9062  | -4.7%   | 1.8634      |
| $X_2$                                                             | 2.9943 | 2.9584 | -1.2%  | 2.9492      | 3.1800 | 2.6772 | -15.8% | 2.9072      | 2.9838 | 2.1681 | -27.3% | 2.5323      | 3.0041  | 2.5579  | -14.9%  | 2.4561      |
| $X_3$                                                             | 0.4945 | 0.5080 | 2.7%   | 0.5042      | 0.4819 | 0.4093 | -15.1% | 0.4444      | 0.4567 | 0.3538 | -22.5% | 0.4173      | 0.5008  | 0.2853  | -43.0%  | 0.2692      |
| $\sigma_e = 0.5, X_2 \sim Uniform(-0.5,0.5), X_3 \sim N(0,2^2)$   |        |        |        |             |        |        |        |             |        |        |        |             |         |         |         |             |
| $C$                                                               | 0.9952 | 1.0089 | 1.4%   | 1.0142      | 0.9954 | 0.9126 | -8.3%  | 1.0018      | 0.9866 | 0.7128 | -27.8% | 0.8366      | 0.9916  | 1.1484  | 15.8%   | 0.9138      |
| $X_1$                                                             | 1.9941 | 1.5817 | -20.7% | 1.9200      | 1.9003 | 1.4071 | -26.0% | 1.8447      | 2.0387 | 1.1988 | -41.2% | 1.6659      | 2.0032  | 1.7473  | -12.8%  | 2.0542      |
| $X_2$                                                             | 3.0309 | 3.0755 | 1.5%   | 3.0566      | 3.1738 | 2.8644 | -9.7%  | 3.1454      | 3.1686 | 2.3192 | -26.8% | 2.7026      | 3.0048  | 3.2798  | 9.2%    | 2.9771      |
| $X_3$                                                             | 0.5045 | 0.5020 | -0.5%  | 0.5037      | 0.4847 | 0.4338 | -10.5% | 0.4745      | 0.5248 | 0.3980 | -24.1% | 0.4647      | 0.4998  | 0.4764  | -4.7%   | 0.4804      |
| $\sigma_e = 0.5, X_2 \sim Uniform(-1,1), X_3 \sim N(0,0.5^2)$     |        |        |        |             |        |        |        |             |        |        |        |             |         |         |         |             |
| $C$                                                               | 1.0011 | 1.0023 | 0.1%   | 1.0020      | 1.0514 | 0.9096 | -13.5% | 0.9879      | 1.0486 | 0.7769 | -25.9% | 0.9200      | 0.9948  | 1.3520  | 35.9%   | 1.0756      |
| $X_1$                                                             | 2.0017 | 1.6044 | -19.8% | 1.9429      | 2.1009 | 1.4814 | -29.5% | 1.9371      | 2.1337 | 1.2037 | -43.6% | 1.6568      | 2.0009  | 1.6121  | -19.4%  | 1.9634      |
| $X_2$                                                             | 2.9934 | 2.9770 | -0.6%  | 2.9576      | 3.1632 | 2.7764 | -12.2% | 3.0607      | 3.2025 | 2.3318 | -27.2% | 2.7489      | 3.0039  | 3.0437  | 1.3%    | 2.8540      |
| $X_3$                                                             | 0.4935 | 0.4781 | -3.1%  | 0.4779      | 0.4478 | 0.4361 | -2.6%  | 0.4820      | 0.4715 | 0.3442 | -27.0% | 0.3840      | 0.4972  | 1.0405  | 109.3%  | 0.9546      |
| $\sigma_e = 0.5, X_2 \sim Uniform(-1,1), X_3 \sim N(0,1^2)$       |        |        |        |             |        |        |        |             |        |        |        |             |         |         |         |             |
| $C$                                                               | 0.9897 | 1.0003 | 1.1%   | 0.9913      | 1.0674 | 0.9410 | -11.8% | 1.0405      | 1.0136 | 0.7521 | -25.8% | 0.8885      | 0.9934  | 1.5747  | 58.5%   | 1.6209      |
| $X_1$                                                             | 1.9989 | 1.6175 | -19.1% | 1.9687      | 2.0855 | 1.5030 | -27.9% | 1.9705      | 1.9624 | 1.1907 | -39.3% | 1.6392      | 2.0007  | 1.4660  | -26.7%  | 1.6153      |
| $X_2$                                                             | 3.0148 | 3.0372 | 0.7%   | 3.0434      | 3.0256 | 2.7237 | -10.0% | 3.0241      | 2.8965 | 2.1821 | -24.7% | 2.5551      | 3.0035  | 3.0134  | 0.3%    | 2.8730      |
| $X_3$                                                             | 0.5078 | 0.5068 | -0.2%  | 0.5032      | 0.4880 | 0.4223 | -13.5% | 0.4677      | 0.4497 | 0.3332 | -25.9% | 0.3914      | 0.5009  | 0.3979  | -20.6%  | 0.3188      |
| $\sigma_e = 0.5, X_2 \sim Uniform(-1,1), X_3 \sim N(0,2^2)$       |        |        |        |             |        |        |        |             |        |        |        |             |         |         |         |             |
| $C$                                                               | 0.9946 | 0.9970 | 0.2%   | 0.9964      | 1.0220 | 0.8879 | -13.1% | 0.9734      | 0.9600 | 0.7374 | -23.2% | 0.8739      | 0.9979  | 1.2586  | 26.1%   | 0.5015      |
| $X_1$                                                             | 2.0050 | 1.5998 | -20.2% | 1.9454      | 2.0100 | 1.3848 | -31.1% | 1.7996      | 1.9923 | 1.1838 | -40.6% | 1.6234      | 2.0015  | 1.7065  | -14.7%  | 2.1955      |
| $X_2$                                                             | 2.9875 | 2.9428 | -1.5%  | 2.9487      | 3.1477 | 2.7740 | -11.9% | 3.0380      | 3.0122 | 2.2767 | -24.4% | 2.6730      | 3.0040  | 2.8947  | -3.6%   | 3.2256      |
| $X_3$                                                             | 0.4993 | 0.5068 | 1.5%   | 0.5060      | 0.5532 | 0.4790 | -13.4% | 0.5213      | 0.4980 | 0.3826 | -23.2% | 0.4515      | 0.4997  | 0.5405  | 8.1%    | 0.5550      |
| $\sigma_e = 0.5, X_2 \sim Uniform(-2,2), X_3 \sim N(0,0.5^2)$     |        |        |        |             |        |        |        |             |        |        |        |             |         |         |         |             |
| $C$                                                               | 0.9973 | 1.0003 | 0.3%   | 1.0104      | 1.0253 | 0.8960 | -12.6% | 0.9813      | 1.0674 | 0.8388 | -21.4% | 1.0273      | 1.0002  | 1.3161  | 31.6%   | 0.3884      |
| $X_1$                                                             | 2.0069 | 1.6184 | -19.4% | 1.9691      | 2.0404 | 1.4259 | -30.1% | 1.8400      | 2.0102 | 1.2674 | -37.0% | 1.8034      | 2.0002  | 1.5199  | -24.0%  | 2.0384      |
| $X_2$                                                             | 3.0029 | 3.0067 | 0.1%   | 3.0026      | 3.0593 | 2.7112 | -11.4% | 2.9517      | 3.0667 | 2.3855 | -22.2% | 2.8977      | 2.9998  | 3.1271  | 4.2%    | 3.4145      |
| $X_3$                                                             | 0.5243 | 0.5284 | 0.8%   | 0.5376      | 0.4500 | 0.3888 | -13.6% | 0.4167      | 0.6278 | 0.4816 | -23.3% | 0.6164      | 0.4999  | 0.3327  | -33.4%  | 0.5148      |
| $\sigma_e = 0.5, X_2 \sim Uniform(-2,2), X_3 \sim N(0,1^2)$       |        |        |        |             |        |        |        |             |        |        |        |             |         |         |         |             |
| $C$                                                               | 0.9919 | 1.0011 | 0.9%   | 0.9975      | 0.9276 | 0.8257 | -11.0% | 0.9047      | 1.0721 | 0.7553 | -29.5% | 0.8921      | 0.9983  | 1.0118  | 1.4%    | 0.7234      |
| $X_1$                                                             | 1.9967 | 1.5989 | -19.9% | 1.9400      | 1.9283 | 1.3945 | -27.7% | 1.8005      | 2.0926 | 1.2153 | -41.9% | 1.6888      | 1.9995  | 1.5563  | -22.2%  | 1.8190      |
| $X_2$                                                             | 2.9985 | 2.9876 | -0.4%  | 2.9784      | 2.9182 | 2.6206 | -10.2% | 2.8411      | 3.0813 | 2.2546 | -26.8% | 2.6694      | 3.0017  | 3.2718  | 9.0%    | 3.3679      |
| $X_3$                                                             | 0.5103 | 0.5084 | -0.4%  | 0.4974      | 0.4205 | 0.3801 | -9.6%  | 0.4118      | 0.5041 | 0.3652 | -27.6% | 0.4208      | 0.5000  | 0.3359  | -32.8%  | 0.2527      |
| $\sigma_e = 0.5, X_2 \sim Uniform(-2,2), X_3 \sim N(0,2^2)$       |        |        |        |             |        |        |        |             |        |        |        |             |         |         |         |             |
| $C$                                                               | 0.9949 | 0.9932 | -0.2%  | 0.9900      | 1.0428 | 0.9325 | -10.6% | 0.9992      | 1.0242 | 0.7419 | -27.6% | 0.8857      | 1.0061  | -0.8169 | -181.2% | -0.1064     |
| $X_1$                                                             | 1.9955 | 1.5963 | -20.0% | 1.9185      | 1.9817 | 1.4320 | -27.7% | 1.8304      | 2.0398 | 1.1479 | -43.7% | 1.5804      | 2.0002  | 2.1570  | 7.8%    | 2.3071      |
| $X_2$                                                             | 2.9912 | 3.0010 | 0.3%   | 2.9962      | 2.9535 | 2.6503 | -10.3% | 2.8607      | 3.0465 | 2.1825 | -28.4% | 2.5653      | 2.9964  | 3.6585  | 22.1%   | 3.4083      |
| $X_3$                                                             | 0.5011 | 0.4939 | -1.4%  | 0.4929      | 0.5121 | 0.4659 | -9.0%  | 0.5037      | 0.5249 | 0.3669 | -30.1% | 0.4302      | 0.4997  | 0.6811  | 36.3%   | 0.5383      |

4)  $X_1$  follows  $N(0,1^2)$  and has measurement error with  $\sigma_e = 0.1$ ;  $X_2$  follows uniform distribution with values in  $[-0.5,0.5]$ ,  $[-1,1]$ , or  $[-2,2]$ ;  $X_3$  follows Bernoulli distribution with  $Pr(X_3 = 1)$  equals 0.7, 0.5, or 0.3.

|                                                                       | OLS    |        |       |             | Logit  |        |       |             | Probit |        |       |             | Poisson |        |        |             |
|-----------------------------------------------------------------------|--------|--------|-------|-------------|--------|--------|-------|-------------|--------|--------|-------|-------------|---------|--------|--------|-------------|
|                                                                       | $b$    | $b'$   | %     | $b_{simex}$ | $b$    | $b'$   | %     | $b_{simex}$ | $b$    | $b'$   | %     | $b_{simex}$ | $b$     | $b'$   | %      | $b_{simex}$ |
| $\sigma_e = 0.1, X_2 \sim Uniform(-0.5,0.5), X_3 \sim Bernoulli(0.7)$ |        |        |       |             |        |        |       |             |        |        |       |             |         |        |        |             |
| $C$                                                                   | 0.9890 | 0.9832 | -0.6% | 0.9862      | 0.9803 | 0.9555 | -2.5% | 0.9621      | 1.0270 | 1.0169 | -1.0% | 1.0407      | 1.0020  | 1.0836 | 8.1%   | 1.0661      |
| $X_1$                                                                 | 1.9948 | 1.9774 | -0.9% | 1.9969      | 2.0962 | 2.0654 | -1.5% | 2.1008      | 1.9982 | 1.9416 | -2.8% | 1.9961      | 2.0020  | 1.9647 | -1.9%  | 1.9842      |
| $X_2$                                                                 | 2.9851 | 2.9870 | 0.1%  | 2.9865      | 3.1391 | 3.1419 | 0.1%  | 3.1662      | 2.9425 | 2.8848 | -2.0% | 2.9385      | 3.0012  | 3.0047 | 0.1%   | 2.9917      |
| $X_3$                                                                 | 0.5158 | 0.5161 | 0.1%  | 0.5146      | 0.6135 | 0.6296 | 2.6%  | 0.6335      | 0.4439 | 0.4305 | -3.0% | 0.4330      | 0.4951  | 0.4534 | -8.4%  | 0.4533      |
| $\sigma_e = 0.1, X_2 \sim Uniform(-0.5,0.5), X_3 \sim Bernoulli(0.5)$ |        |        |       |             |        |        |       |             |        |        |       |             |         |        |        |             |
| $C$                                                                   | 1.0147 | 1.0196 | 0.5%  | 1.0185      | 1.0813 | 1.0769 | -0.4% | 1.0832      | 0.9485 | 0.9343 | -1.5% | 0.9496      | 1.0008  | 1.0399 | 3.9%   | 1.0051      |
| $X_1$                                                                 | 2.0033 | 1.9830 | -1.0% | 2.0010      | 1.9563 | 1.9289 | -1.4% | 1.9584      | 1.9203 | 1.8644 | -2.9% | 1.9141      | 2.0027  | 1.9918 | -0.5%  | 2.0153      |
| $X_2$                                                                 | 3.0249 | 3.0306 | 0.2%  | 3.0334      | 2.9670 | 2.9435 | -0.8% | 2.9637      | 2.7937 | 2.7215 | -2.6% | 2.7652      | 2.9942  | 3.0674 | 2.4%   | 3.0826      |
| $X_3$                                                                 | 0.4727 | 0.4737 | 0.2%  | 0.4742      | 0.3659 | 0.3582 | -2.1% | 0.3596      | 0.5125 | 0.5024 | -2.0% | 0.5149      | 0.4950  | 0.4245 | -14.3% | 0.4386      |
| $\sigma_e = 0.1, X_2 \sim Uniform(-0.5,0.5), X_3 \sim Bernoulli(0.3)$ |        |        |       |             |        |        |       |             |        |        |       |             |         |        |        |             |
| $C$                                                                   | 0.9981 | 1.0012 | 0.3%  | 1.0020      | 1.0141 | 1.0190 | 0.5%  | 1.0235      | 1.0053 | 0.9872 | -1.8% | 1.0051      | 1.0006  | 1.0459 | 4.5%   | 1.0335      |
| $X_1$                                                                 | 2.0004 | 1.9839 | -0.8% | 2.0037      | 1.9689 | 1.9466 | -1.1% | 1.9780      | 1.9758 | 1.9200 | -2.8% | 1.9750      | 2.0014  | 1.9804 | -1.0%  | 1.9913      |
| $X_2$                                                                 | 2.9635 | 2.9583 | -0.2% | 2.9606      | 2.9233 | 2.9118 | -0.4% | 2.9256      | 2.9554 | 2.9054 | -1.7% | 2.9551      | 2.9871  | 2.8752 | -3.7%  | 2.8777      |
| $X_3$                                                                 | 0.4942 | 0.4910 | -0.6% | 0.4898      | 0.4947 | 0.4835 | -2.3% | 0.4927      | 0.5139 | 0.4915 | -4.4% | 0.5013      | 0.5024  | 0.4417 | -12.1% | 0.4546      |
| $\sigma_e = 0.1, X_2 \sim Uniform(-1,1), X_3 \sim Bernoulli(0.7)$     |        |        |       |             |        |        |       |             |        |        |       |             |         |        |        |             |
| $C$                                                                   | 1.0033 | 1.0046 | 0.1%  | 1.0059      | 0.9756 | 0.9599 | -1.6% | 0.9643      | 1.0014 | 0.9685 | -3.3% | 0.9860      | 0.9875  | 0.9805 | -0.7%  | 0.9455      |
| $X_1$                                                                 | 2.0031 | 1.9830 | -1.0% | 2.0033      | 1.9765 | 1.9465 | -1.5% | 1.9779      | 2.0250 | 1.9315 | -4.6% | 1.9902      | 2.0015  | 2.0064 | 0.2%   | 2.0421      |
| $X_2$                                                                 | 2.9980 | 2.9996 | 0.1%  | 3.0001      | 2.8218 | 2.8083 | -0.5% | 2.8269      | 3.0505 | 2.9689 | -2.7% | 3.0279      | 3.0106  | 3.0451 | 1.1%   | 3.0533      |
| $X_3$                                                                 | 0.4890 | 0.4831 | -1.2% | 0.4816      | 0.4885 | 0.4962 | 1.6%  | 0.4993      | 0.4835 | 0.4794 | -0.8% | 0.4916      | 0.5022  | 0.4631 | -7.8%  | 0.4589      |
| $\sigma_e = 0.1, X_2 \sim Uniform(-1,1), X_3 \sim Bernoulli(0.5)$     |        |        |       |             |        |        |       |             |        |        |       |             |         |        |        |             |
| $C$                                                                   | 1.0022 | 0.9976 | -0.5% | 0.9981      | 1.0134 | 0.9986 | -1.5% | 1.0031      | 0.9957 | 0.9803 | -1.5% | 1.0012      | 1.0109  | 1.0140 | 0.3%   | 1.0182      |
| $X_1$                                                                 | 2.0046 | 1.9856 | -0.9% | 2.0044      | 1.8855 | 1.8547 | -1.6% | 1.8824      | 1.9194 | 1.8618 | -3.0% | 1.9212      | 1.9984  | 1.9781 | -1.0%  | 1.9833      |
| $X_2$                                                                 | 2.9999 | 2.9996 | -0.0% | 2.9999      | 3.0445 | 3.0313 | -0.4% | 3.0488      | 2.9871 | 2.9447 | -1.4% | 3.0075      | 2.9920  | 2.9948 | 0.1%   | 2.9974      |
| $X_3$                                                                 | 0.4955 | 0.5069 | 2.3%  | 0.5070      | 0.5454 | 0.5562 | 2.0%  | 0.5607      | 0.4508 | 0.4329 | -4.0% | 0.4427      | 0.4950  | 0.5323 | 7.5%   | 0.5281      |
| $\sigma_e = 0.1, X_2 \sim Uniform(-1,1), X_3 \sim Bernoulli(0.3)$     |        |        |       |             |        |        |       |             |        |        |       |             |         |        |        |             |
| $C$                                                                   | 1.0066 | 1.0067 | 0.0%  | 1.0058      | 1.0606 | 1.0545 | -0.6% | 1.0635      | 1.0387 | 1.0317 | -0.7% | 1.0518      | 0.9981  | 1.0385 | 4.0%   | 1.0201      |
| $X_1$                                                                 | 1.9959 | 1.9760 | -1.0% | 1.9951      | 2.0698 | 2.0342 | -1.7% | 2.0702      | 2.0574 | 2.0246 | -1.6% | 2.0826      | 2.0012  | 1.9608 | -2.0%  | 1.9760      |
| $X_2$                                                                 | 2.9936 | 2.9901 | -0.1% | 2.9901      | 3.1364 | 3.1140 | -0.7% | 3.1402      | 3.0080 | 2.9752 | -1.1% | 3.0336      | 2.9995  | 2.9775 | -0.7%  | 2.9724      |
| $X_3$                                                                 | 0.4980 | 0.4958 | -0.4% | 0.4992      | 0.4650 | 0.4557 | -2.0% | 0.4603      | 0.4711 | 0.4748 | 0.8%  | 0.4812      | 0.5010  | 0.5419 | 8.2%   | 0.5466      |
| $\sigma_e = 0.1, X_2 \sim Uniform(-2,2), X_3 \sim Bernoulli(0.7)$     |        |        |       |             |        |        |       |             |        |        |       |             |         |        |        |             |
| $C$                                                                   | 0.9915 | 0.9982 | 0.7%  | 0.9965      | 0.9675 | 0.9579 | -1.0% | 0.9600      | 0.8955 | 0.8828 | -1.4% | 0.9036      | 0.9975  | 1.0937 | 9.6%   | 1.1480      |
| $X_1$                                                                 | 1.9888 | 1.9643 | -1.2% | 1.9833      | 1.8312 | 1.7930 | -2.1% | 1.8201      | 1.9976 | 1.9411 | -2.8% | 2.0020      | 2.0004  | 1.9573 | -2.2%  | 1.9704      |
| $X_2$                                                                 | 2.9883 | 2.9903 | 0.1%  | 2.9903      | 2.7965 | 2.7775 | -0.7% | 2.7922      | 2.9534 | 2.9088 | -1.5% | 2.9687      | 3.0014  | 2.9675 | -1.1%  | 2.9389      |
| $X_3$                                                                 | 0.5000 | 0.4911 | -1.8% | 0.4918      | 0.3255 | 0.3272 | 0.5%  | 0.3327      | 0.6091 | 0.5980 | -1.8% | 0.6065      | 0.4997  | 0.5168 | 3.4%   | 0.4969      |
| $\sigma_e = 0.1, X_2 \sim Uniform(-2,2), X_3 \sim Bernoulli(0.5)$     |        |        |       |             |        |        |       |             |        |        |       |             |         |        |        |             |
| $C$                                                                   | 0.9936 | 0.9946 | 0.1%  | 0.9924      | 1.0916 | 1.0880 | -0.3% | 1.0932      | 1.0669 | 1.0507 | -1.5% | 1.0691      | 0.9976  | 0.9893 | -0.8%  | 0.9714      |
| $X_1$                                                                 | 2.0081 | 1.9916 | -0.8% | 2.0110      | 2.1149 | 2.0888 | -1.2% | 2.1155      | 1.9844 | 1.9422 | -2.1% | 1.9906      | 1.9994  | 1.9803 | -1.0%  | 1.9950      |
| $X_2$                                                                 | 3.0074 | 3.0036 | -0.1% | 3.0035      | 3.0986 | 3.0818 | -0.5% | 3.0960      | 3.0486 | 3.0154 | -1.1% | 3.0651      | 3.0022  | 3.0386 | 1.2%   | 3.0430      |
| $X_3$                                                                 | 0.5111 | 0.5112 | 0.0%  | 0.5127      | 0.3912 | 0.3822 | -2.3% | 0.3822      | 0.4371 | 0.4268 | -2.4% | 0.4250      | 0.4998  | 0.4372 | -12.5% | 0.4320      |
| $\sigma_e = 0.1, X_2 \sim Uniform(-2,2), X_3 \sim Bernoulli(0.3)$     |        |        |       |             |        |        |       |             |        |        |       |             |         |        |        |             |
| $C$                                                                   | 0.9983 | 1.0011 | 0.3%  | 1.0028      | 0.9279 | 0.9229 | -0.5% | 0.9291      | 0.9343 | 0.9043 | -3.2% | 0.9223      | 1.0021  | 1.0096 | 0.7%   | 0.9636      |
| $X_1$                                                                 | 1.9981 | 1.9833 | -0.7% | 2.0026      | 1.9720 | 1.9523 | -1.0% | 1.9825      | 2.0293 | 1.9712 | -2.9% | 2.0286      | 2.0002  | 1.9880 | -0.6%  | 2.0128      |
| $X_2$                                                                 | 3.0070 | 3.0075 | 0.0%  | 3.0082      | 2.9955 | 2.9837 | -0.4% | 3.0008      | 3.0450 | 2.9893 | -1.8% | 3.0449      | 2.9984  | 2.9923 | -0.2%  | 3.0050      |
| $X_3$                                                                 | 0.4977 | 0.4986 | 0.2%  | 0.4957      | 0.7150 | 0.7150 | -0.0% | 0.7150      | 0.5117 | 0.5024 | -1.8% | 0.5084      | 0.5012  | 0.5117 | 2.1%   | 0.4970      |

5)  $X_1$  follows  $N(0,1^2)$  and has measurement error with  $\sigma_e = 0.3$ ;  $X_2$  follows uniform distribution with values in  $[-0.5,0.5]$ ,  $[-1,1]$ , or  $[-2,2]$ ;  $X_3$  follows Bernoulli distribution with  $Pr(X_3 = 1)$  equals 0.7, 0.5, or 0.3.

|                                                                       | OLS      |           |       |                          | Logit    |           |        |                          | Probit   |           |        |                          | Poisson  |           |        |                          |
|-----------------------------------------------------------------------|----------|-----------|-------|--------------------------|----------|-----------|--------|--------------------------|----------|-----------|--------|--------------------------|----------|-----------|--------|--------------------------|
|                                                                       | <i>b</i> | <i>b'</i> | %     | <i>b<sub>simex</sub></i> | <i>b</i> | <i>b'</i> | %      | <i>b<sub>simex</sub></i> | <i>b</i> | <i>b'</i> | %      | <i>b<sub>simex</sub></i> | <i>b</i> | <i>b'</i> | %      | <i>b<sub>simex</sub></i> |
| $\sigma_e = 0.3, X_2 \sim Uniform(-0.5,0.5), X_3 \sim Bernoulli(0.7)$ |          |           |       |                          |          |           |        |                          |          |           |        |                          |          |           |        |                          |
| <i>C</i>                                                              | 1.0094   | 1.0215    | 1.2%  | 1.0233                   | 1.0025   | 0.9714    | -3.1%  | 1.0226                   | 1.0107   | 0.8740    | -13.5% | 0.9696                   | 1.0135   | 1.2538    | 23.7%  | 1.0415                   |
| <i>X<sub>1</sub></i>                                                  | 2.0055   | 1.8413    | -8.2% | 1.9963                   | 1.9954   | 1.7838    | -10.6% | 2.0167                   | 2.0811   | 1.6008    | -23.1% | 1.9274                   | 1.9969   | 1.7976    | -10.0% | 2.0100                   |
| <i>X<sub>2</sub></i>                                                  | 2.9980   | 2.9749    | -0.8% | 2.9618                   | 3.1505   | 3.0760    | -2.4%  | 3.2239                   | 3.1263   | 2.6413    | -15.5% | 2.9505                   | 2.9821   | 3.0747    | 3.1%   | 3.0715                   |
| <i>X<sub>3</sub></i>                                                  | 0.4930   | 0.4745    | -3.7% | 0.4743                   | 0.4779   | 0.4569    | -4.4%  | 0.4838                   | 0.5063   | 0.4169    | -17.7% | 0.4608                   | 0.4950   | 0.4663    | -5.8%  | 0.4454                   |
| $\sigma_e = 0.3, X_2 \sim Uniform(-0.5,0.5), X_3 \sim Bernoulli(0.5)$ |          |           |       |                          |          |           |        |                          |          |           |        |                          |          |           |        |                          |
| <i>C</i>                                                              | 1.0140   | 1.0033    | -1.0% | 1.0146                   | 0.9835   | 0.9558    | -2.8%  | 1.0127                   | 0.9817   | 0.8688    | -11.5% | 0.9748                   | 1.0062   | 1.0496    | 4.3%   | 0.8946                   |
| <i>X<sub>1</sub></i>                                                  | 1.9976   | 1.8310    | -8.3% | 1.9948                   | 1.9657   | 1.7119    | -12.9% | 1.9496                   | 2.0318   | 1.6540    | -18.6% | 2.0050                   | 1.9979   | 1.9010    | -4.9%  | 2.0516                   |
| <i>X<sub>2</sub></i>                                                  | 3.0238   | 3.0376    | 0.5%  | 3.0455                   | 2.8599   | 2.7185    | -4.9%  | 2.8451                   | 2.9275   | 2.5545    | -12.7% | 2.8515                   | 2.9973   | 3.1464    | 5.0%   | 3.2791                   |
| <i>X<sub>3</sub></i>                                                  | 0.4771   | 0.4889    | 2.5%  | 0.4788                   | 0.4904   | 0.4544    | -7.3%  | 0.4665                   | 0.5425   | 0.4646    | -14.4% | 0.5274                   | 0.4988   | 0.5212    | 4.5%   | 0.4998                   |
| $\sigma_e = 0.3, X_2 \sim Uniform(-0.5,0.5), X_3 \sim Bernoulli(0.3)$ |          |           |       |                          |          |           |        |                          |          |           |        |                          |          |           |        |                          |
| <i>C</i>                                                              | 0.9917   | 0.9779    | -1.4% | 0.9808                   | 1.0439   | 0.9393    | -10.0% | 1.0014                   | 0.9818   | 0.8741    | -11.0% | 0.9789                   | 1.0002   | 0.9186    | -8.2%  | 0.6898                   |
| <i>X<sub>1</sub></i>                                                  | 2.0112   | 1.8311    | -9.0% | 1.9912                   | 2.2068   | 1.8909    | -14.3% | 2.1782                   | 2.0097   | 1.6512    | -17.8% | 1.9945                   | 2.0013   | 1.8887    | -5.6%  | 2.0981                   |
| <i>X<sub>2</sub></i>                                                  | 3.0224   | 3.0145    | -0.3% | 3.0203                   | 3.4398   | 3.2311    | -6.1%  | 3.4546                   | 3.1152   | 2.7135    | -12.9% | 3.0863                   | 2.9898   | 3.3970    | 13.6%  | 3.3657                   |
| <i>X<sub>3</sub></i>                                                  | 0.5183   | 0.5362    | 3.5%  | 0.5387                   | 0.4685   | 0.4733    | 1.0%   | 0.4937                   | 0.4414   | 0.3540    | -19.8% | 0.3950                   | 0.5019   | 0.7163    | 42.7%  | 0.6681                   |
| $\sigma_e = 0.3, X_2 \sim Uniform(-0.5,0.5), X_3 \sim Bernoulli(0.7)$ |          |           |       |                          |          |           |        |                          |          |           |        |                          |          |           |        |                          |
| <i>C</i>                                                              | 1.0058   | 0.9902    | -1.5% | 0.9944                   | 0.9195   | 0.8758    | -4.8%  | 0.9097                   | 1.0277   | 0.8857    | -13.8% | 0.9778                   | 0.9960   | 1.1875    | 19.2%  | 1.0032                   |
| <i>X<sub>1</sub></i>                                                  | 1.9970   | 1.8333    | -8.2% | 1.9942                   | 2.0078   | 1.7336    | -13.7% | 1.9628                   | 1.9817   | 1.5671    | -20.9% | 1.8821                   | 2.0017   | 1.8022    | -10.0% | 1.9874                   |
| <i>X<sub>2</sub></i>                                                  | 2.9997   | 3.0079    | 0.3%  | 3.0101                   | 3.0750   | 2.8873    | -6.1%  | 3.0183                   | 2.9041   | 2.5159    | -13.4% | 2.8065                   | 2.9982   | 3.0122    | 0.5%   | 3.0298                   |
| <i>X<sub>3</sub></i>                                                  | 0.4897   | 0.5142    | 5.0%  | 0.5094                   | 0.5548   | 0.5303    | -4.4%  | 0.5584                   | 0.4323   | 0.3775    | -12.7% | 0.4346                   | 0.5006   | 0.5602    | 11.9%  | 0.5247                   |
| $\sigma_e = 0.3, X_2 \sim Uniform(-1,1), X_3 \sim Bernoulli(0.5)$     |          |           |       |                          |          |           |        |                          |          |           |        |                          |          |           |        |                          |
| <i>C</i>                                                              | 0.9859   | 0.9827    | -0.3% | 0.9863                   | 0.9832   | 0.9120    | -7.2%  | 0.9473                   | 0.9943   | 0.8616    | -13.3% | 0.9541                   | 0.9887   | 1.3564    | 37.2%  | 1.1239                   |
| <i>X<sub>1</sub></i>                                                  | 1.9879   | 1.8339    | -7.7% | 1.9881                   | 1.9611   | 1.6957    | -13.5% | 1.9306                   | 1.9491   | 1.5526    | -20.3% | 1.8472                   | 2.0011   | 1.7852    | -10.8% | 1.9532                   |
| <i>X<sub>2</sub></i>                                                  | 3.0194   | 3.0109    | -0.3% | 3.0085                   | 2.9077   | 2.7592    | -5.1%  | 2.8975                   | 2.9808   | 2.5752    | -13.6% | 2.8334                   | 3.0087   | 2.7518    | -8.5%  | 2.8406                   |
| <i>X<sub>3</sub></i>                                                  | 0.5042   | 0.4956    | -1.7% | 0.4890                   | 0.4933   | 0.4921    | -0.2%  | 0.5182                   | 0.5358   | 0.4962    | -7.4%  | 0.5485                   | 0.5024   | 0.5101    | 1.5%   | 0.5290                   |
| $\sigma_e = 0.3, X_2 \sim Uniform(-0.5,0.5), X_3 \sim Bernoulli(0.3)$ |          |           |       |                          |          |           |        |                          |          |           |        |                          |          |           |        |                          |
| <i>C</i>                                                              | 0.9976   | 1.0156    | 1.8%  | 1.0182                   | 0.9670   | 0.9091    | -6.0%  | 0.9645                   | 1.0266   | 0.8995    | -12.4% | 1.0202                   | 1.0063   | 1.3079    | 30.0%  | 1.1480                   |
| <i>X<sub>1</sub></i>                                                  | 1.9976   | 1.8432    | -7.7% | 1.9999                   | 1.9961   | 1.7566    | -12.0% | 2.0072                   | 2.1116   | 1.6924    | -19.9% | 2.0708                   | 1.9987   | 1.7518    | -12.4% | 1.9111                   |
| <i>X<sub>2</sub></i>                                                  | 2.9999   | 2.9965    | -0.1% | 3.0023                   | 2.9524   | 2.8130    | -4.7%  | 2.9729                   | 3.1454   | 2.7098    | -13.8% | 3.0923                   | 2.9971   | 2.9637    | -1.1%  | 2.9470                   |
| <i>X<sub>3</sub></i>                                                  | 0.5083   | 0.5015    | -1.3% | 0.4999                   | 0.3796   | 0.3668    | -3.4%  | 0.3892                   | 0.6029   | 0.4871    | -19.2% | 0.5600                   | 0.4982   | 0.4535    | -9.0%  | 0.4619                   |
| $\sigma_e = 0.3, X_2 \sim Uniform(-0.5,0.5), X_3 \sim Bernoulli(0.7)$ |          |           |       |                          |          |           |        |                          |          |           |        |                          |          |           |        |                          |
| <i>C</i>                                                              | 0.9896   | 0.9719    | -1.8% | 0.9684                   | 0.9470   | 0.8854    | -6.5%  | 0.9298                   | 1.0512   | 0.9031    | -14.1% | 0.9943                   | 0.9979   | 0.8952    | -10.3% | 0.6011                   |
| <i>X<sub>1</sub></i>                                                  | 1.9953   | 1.8401    | -7.8% | 1.9989                   | 2.0455   | 1.7975    | -12.1% | 2.0505                   | 1.8914   | 1.4956    | -20.9% | 1.7711                   | 2.0005   | 1.9871    | -0.7%  | 2.1876                   |
| <i>X<sub>2</sub></i>                                                  | 3.0095   | 3.0031    | -0.2% | 3.0054                   | 3.0851   | 2.9416    | -4.7%  | 3.0928                   | 2.8520   | 2.4763    | -13.2% | 2.7184                   | 2.9999   | 3.1113    | 3.7%   | 3.1635                   |
| <i>X<sub>3</sub></i>                                                  | 0.5081   | 0.5308    | 4.5%  | 0.5276                   | 0.5687   | 0.5755    | 1.2%   | 0.6085                   | 0.4552   | 0.4018    | -11.7% | 0.4322                   | 0.5012   | 0.3235    | -35.4% | 0.3113                   |
| $\sigma_e = 0.3, X_2 \sim Uniform(-2,2), X_3 \sim Bernoulli(0.5)$     |          |           |       |                          |          |           |        |                          |          |           |        |                          |          |           |        |                          |
| <i>C</i>                                                              | 1.0063   | 1.0128    | 0.7%  | 1.0073                   | 0.9109   | 0.8446    | -7.3%  | 0.8757                   | 1.0201   | 0.8917    | -12.6% | 0.9898                   | 0.9978   | 1.5305    | 53.4%  | 1.2190                   |
| <i>X<sub>1</sub></i>                                                  | 1.9878   | 1.8181    | -8.5% | 1.9824                   | 1.9937   | 1.6946    | -15.0% | 1.9004                   | 2.0717   | 1.6710    | -19.3% | 2.0468                   | 2.0002   | 1.7013    | -14.9% | 1.9017                   |
| <i>X<sub>2</sub></i>                                                  | 2.9969   | 2.9835    | -0.4% | 2.9853                   | 3.0294   | 2.8510    | -5.9%  | 2.9644                   | 3.0774   | 2.6710    | -13.2% | 3.0323                   | 3.0010   | 2.9323    | -2.3%  | 3.0159                   |
| <i>X<sub>3</sub></i>                                                  | 0.5041   | 0.5139    | 1.9%  | 0.5218                   | 0.4996   | 0.4699    | -5.9%  | 0.4856                   | 0.5512   | 0.4712    | -14.5% | 0.5517                   | 0.5003   | 0.3589    | -28.3% | 0.3384                   |
| $\sigma_e = 0.3, X_2 \sim Uniform(-0.5,0.5), X_3 \sim Bernoulli(0.3)$ |          |           |       |                          |          |           |        |                          |          |           |        |                          |          |           |        |                          |
| <i>C</i>                                                              | 1.0131   | 1.0138    | 0.1%  | 1.0142                   | 1.0894   | 1.0224    | -6.1%  | 1.0780                   | 0.9744   | 0.8403    | -13.8% | 0.9493                   | 0.9978   | 1.2053    | 20.8%  | 0.9686                   |
| <i>X<sub>1</sub></i>                                                  | 2.0011   | 1.8410    | -8.0% | 1.9974                   | 2.0463   | 1.7509    | -14.4% | 1.9753                   | 2.0486   | 1.6022    | -21.8% | 1.9528                   | 1.9999   | 1.8198    | -9.0%  | 2.0240                   |
| <i>X<sub>2</sub></i>                                                  | 3.0106   | 3.0137    | 0.1%  | 3.0154                   | 3.0750   | 2.8965    | -5.8%  | 3.0273                   | 3.1229   | 2.6810    | -14.2% | 3.0188                   | 3.0011   | 2.9236    | -2.6%  | 2.9581                   |
| <i>X<sub>3</sub></i>                                                  | 0.4873   | 0.4711    | -3.3% | 0.4746                   | 0.5202   | 0.4768    | -8.3%  | 0.4986                   | 0.5697   | 0.5249    | -7.9%  | 0.5710                   | 0.4989   | 0.6862    | 37.5%  | 0.6917                   |

6)  $X_1$  follows  $N(0,1^2)$  and has measurement error with  $\sigma_e = 0.5$ ;  $X_2$  follows uniform distribution with values in  $[-0.5,0.5]$ ,  $[-1,1]$ , or  $[-2,2]$ ;  $X_3$  follows Bernoulli distribution with  $Pr(X_3 = 1)$  equals 0.7, 0.5, or 0.3.

|                                                                       | OLS      |           |        |                          | Logit    |           |        |                          | Probit   |           |        |                          | Poisson  |           |        |                          |
|-----------------------------------------------------------------------|----------|-----------|--------|--------------------------|----------|-----------|--------|--------------------------|----------|-----------|--------|--------------------------|----------|-----------|--------|--------------------------|
|                                                                       | <i>b</i> | <i>b'</i> | %      | <i>b<sub>simex</sub></i> |
| $\sigma_e = 0.5, X_2 \sim Uniform(-0.5,0.5), X_3 \sim Bernoulli(0.7)$ |          |           |        |                          |          |           |        |                          |          |           |        |                          |          |           |        |                          |
| <i>C</i>                                                              | 0.9986   | 1.0139    | 1.5%   | 1.0073                   | 0.9924   | 0.8909    | -10.2% | 0.9888                   | 1.0428   | 0.7797    | -25.2% | 0.9189                   | 0.9998   | 1.5383    | 53.9%  | 1.2408                   |
| $X_1$                                                                 | 1.9926   | 1.5897    | -20.2% | 1.9414                   | 1.9813   | 1.3900    | -29.8% | 1.8322                   | 1.9894   | 1.2303    | -38.2% | 1.7006                   | 2.0051   | 1.5230    | -24.0% | 1.8935                   |
| $X_2$                                                                 | 2.9560   | 2.9240    | -1.1%  | 2.9434                   | 3.1300   | 2.6969    | -13.8% | 2.9583                   | 3.1303   | 2.3926    | -23.6% | 2.8327                   | 2.9986   | 2.9688    | -1.0%  | 3.0863                   |
| $X_3$                                                                 | 0.5011   | 0.4931    | -1.6%  | 0.4962                   | 0.4839   | 0.4034    | -16.6% | 0.4316                   | 0.4566   | 0.3716    | -18.6% | 0.4423                   | 0.4937   | 0.3666    | -25.7% | 0.2651                   |
| $\sigma_e = 0.5, X_2 \sim Uniform(-0.5,0.5), X_3 \sim Bernoulli(0.5)$ |          |           |        |                          |          |           |        |                          |          |           |        |                          |          |           |        |                          |
| <i>C</i>                                                              | 0.9999   | 0.9877    | -1.2%  | 0.9931                   | 0.8877   | 0.7989    | -10.0% | 0.8769                   | 0.9432   | 0.7030    | -25.5% | 0.8311                   | 1.0112   | 1.7148    | 69.6%  | 1.5850                   |
| $X_1$                                                                 | 2.0022   | 1.5913    | -20.5% | 1.9301                   | 1.9257   | 1.3498    | -29.9% | 1.7591                   | 1.9637   | 1.1930    | -39.2% | 1.6539                   | 1.9960   | 1.4729    | -26.2% | 1.7485                   |
| $X_2$                                                                 | 2.9722   | 2.9639    | -0.3%  | 2.9531                   | 2.9477   | 2.6064    | -11.6% | 2.8385                   | 2.7518   | 2.0018    | -27.3% | 2.3609                   | 2.9964   | 2.7634    | -7.8%  | 2.4771                   |
| $X_3$                                                                 | 0.4866   | 0.5041    | 3.6%   | 0.4973                   | 0.5906   | 0.4934    | -16.5% | 0.5337                   | 0.4300   | 0.3310    | -23.0% | 0.3976                   | 0.4955   | 0.4422    | -10.7% | 0.2578                   |
| $\sigma_e = 0.5, X_2 \sim Uniform(-0.5,0.5), X_3 \sim Bernoulli(0.3)$ |          |           |        |                          |          |           |        |                          |          |           |        |                          |          |           |        |                          |
| <i>C</i>                                                              | 0.9957   | 1.0010    | 0.5%   | 0.9976                   | 0.9936   | 0.8621    | -13.2% | 0.9481                   | 0.9493   | 0.7011    | -26.1% | 0.8193                   | 1.0015   | 0.9271    | -7.4%  | 0.4324                   |
| $X_1$                                                                 | 1.9987   | 1.5845    | -20.7% | 1.9221                   | 1.9780   | 1.4095    | -28.7% | 1.8431                   | 1.9898   | 1.1803    | -40.7% | 1.6127                   | 1.9971   | 1.7949    | -10.1% | 2.1738                   |
| $X_2$                                                                 | 3.0299   | 3.0008    | -1.0%  | 2.9955                   | 2.9264   | 2.5108    | -14.2% | 2.7589                   | 3.0155   | 2.2235    | -26.3% | 2.6136                   | 3.0046   | 3.4178    | 13.8%  | 3.4287                   |
| $X_3$                                                                 | 0.4858   | 0.4706    | -3.1%  | 0.4767                   | 0.5018   | 0.4616    | -8.0%  | 0.4836                   | 0.6045   | 0.4335    | -28.3% | 0.5026                   | 0.5086   | 0.8280    | 62.8%  | 0.9167                   |
| $\sigma_e = 0.5, X_2 \sim Uniform(-0.5,0.5), X_3 \sim Bernoulli(0.7)$ |          |           |        |                          |          |           |        |                          |          |           |        |                          |          |           |        |                          |
| <i>C</i>                                                              | 0.9982   | 0.9819    | -1.6%  | 0.9708                   | 0.8912   | 0.7893    | -11.4% | 0.8838                   | 1.0138   | 0.7891    | -22.2% | 0.9248                   | 0.9968   | 1.5178    | 52.3%  | 1.7234                   |
| $X_1$                                                                 | 2.0003   | 1.5838    | -20.8% | 1.9175                   | 1.9544   | 1.3372    | -31.6% | 1.7301                   | 1.9510   | 1.1613    | -40.5% | 1.5927                   | 2.0026   | 1.4536    | -27.4% | 1.6076                   |
| $X_2$                                                                 | 3.0014   | 2.9941    | -0.2%  | 2.9998                   | 2.9521   | 2.5467    | -13.7% | 2.7821                   | 2.9642   | 2.2232    | -25.0% | 2.5829                   | 3.0002   | 2.8480    | -5.1%  | 2.6149                   |
| $X_3$                                                                 | 0.5039   | 0.5042    | 0.1%   | 0.5143                   | 0.6527   | 0.5665    | -13.2% | 0.5955                   | 0.4588   | 0.2999    | -34.6% | 0.3419                   | 0.4998   | 0.7062    | 41.3%  | 0.5433                   |
| $\sigma_e = 0.5, X_2 \sim Uniform(-1,1), X_3 \sim Bernoulli(0.5)$     |          |           |        |                          |          |           |        |                          |          |           |        |                          |          |           |        |                          |
| <i>C</i>                                                              | 0.9976   | 0.9848    | -1.3%  | 0.9892                   | 1.0327   | 0.8821    | -14.6% | 0.9697                   | 1.0229   | 0.7701    | -24.7% | 0.9285                   | 0.9972   | 1.4438    | 44.8%  | 1.1364                   |
| $X_1$                                                                 | 1.9907   | 1.5948    | -19.9% | 1.9435                   | 2.0033   | 1.4128    | -29.5% | 1.8348                   | 2.0326   | 1.2198    | -40.0% | 1.7075                   | 2.0005   | 1.5184    | -24.1% | 1.7750                   |
| $X_2$                                                                 | 2.9930   | 2.9657    | -0.9%  | 2.9708                   | 3.0194   | 2.6674    | -11.7% | 2.9102                   | 3.0504   | 2.3000    | -24.6% | 2.7394                   | 3.0040   | 2.8300    | -5.8%  | 3.0203                   |
| $X_3$                                                                 | 0.5165   | 0.5580    | 8.0%   | 0.5418                   | 0.5411   | 0.4960    | -8.3%  | 0.5420                   | 0.4243   | 0.3151    | -25.7% | 0.3598                   | 0.4986   | 0.6127    | 22.9%  | 0.5887                   |
| $\sigma_e = 0.5, X_2 \sim Uniform(-0.5,0.5), X_3 \sim Bernoulli(0.3)$ |          |           |        |                          |          |           |        |                          |          |           |        |                          |          |           |        |                          |
| <i>C</i>                                                              | 0.9992   | 0.9820    | -1.7%  | 0.9782                   | 0.9919   | 0.8644    | -12.9% | 0.9375                   | 1.0322   | 0.7520    | -27.2% | 0.8844                   | 1.0010   | 1.8824    | 88.1%  | 1.9311                   |
| $X_1$                                                                 | 2.0018   | 1.5861    | -20.8% | 1.9243                   | 2.0646   | 1.4416    | -30.2% | 1.8788                   | 2.0549   | 1.2266    | -40.3% | 1.6935                   | 1.9996   | 1.3634    | -31.8% | 1.5026                   |
| $X_2$                                                                 | 3.0082   | 3.0187    | 0.4%   | 3.0260                   | 3.0483   | 2.6975    | -11.5% | 2.9544                   | 3.0332   | 2.2514    | -25.8% | 2.6743                   | 2.9989   | 2.9302    | -2.3%  | 2.7933                   |
| $X_3$                                                                 | 0.4958   | 0.4960    | 0.0%   | 0.5394                   | 0.6213   | 0.5552    | -10.6% | 0.6488                   | 0.4428   | 0.3344    | -24.5% | 0.3745                   | 0.4990   | 0.3534    | -29.2% | 0.3076                   |
| $\sigma_e = 0.5, X_2 \sim Uniform(-0.5,0.5), X_3 \sim Bernoulli(0.7)$ |          |           |        |                          |          |           |        |                          |          |           |        |                          |          |           |        |                          |
| <i>C</i>                                                              | 0.9803   | 0.9724    | -0.8%  | 0.9812                   | 0.9828   | 0.9039    | -8.0%  | 0.9598                   | 0.9292   | 0.6538    | -29.6% | 0.7730                   | 1.0012   | 2.1004    | 109.8% | 2.4481                   |
| $X_1$                                                                 | 2.0076   | 1.6064    | -20.0% | 1.9381                   | 1.9872   | 1.4640    | -26.3% | 1.9130                   | 2.0436   | 1.1708    | -42.7% | 1.6019                   | 1.9998   | 1.3544    | -32.3% | 1.5052                   |
| $X_2$                                                                 | 2.9977   | 3.0033    | 0.2%   | 3.0066                   | 2.9765   | 2.6913    | -9.6%  | 2.9200                   | 3.0458   | 2.1954    | -27.9% | 2.5881                   | 2.9995   | 2.7620    | -7.9%  | 2.5951                   |
| $X_3$                                                                 | 0.5254   | 0.5417    | 3.1%   | 0.5441                   | 0.4824   | 0.4319    | -10.5% | 0.4946                   | 0.6321   | 0.4722    | -25.3% | 0.5434                   | 0.4998   | 0.4941    | -1.1%  | 0.2981                   |
| $\sigma_e = 0.5, X_2 \sim Uniform(-2,2), X_3 \sim Bernoulli(0.5)$     |          |           |        |                          |          |           |        |                          |          |           |        |                          |          |           |        |                          |
| <i>C</i>                                                              | 0.9945   | 0.9821    | -1.2%  | 0.9852                   | 0.9187   | 0.8136    | -11.4% | 0.8663                   | 0.9647   | 0.7381    | -23.5% | 0.8744                   | 0.9959   | 1.2353    | 24.0%  | 0.4985                   |
| $X_1$                                                                 | 1.9997   | 1.6205    | -19.0% | 1.9669                   | 1.9385   | 1.3618    | -29.7% | 1.7316                   | 2.0454   | 1.2668    | -38.1% | 1.7816                   | 2.0006   | 1.7058    | -14.7% | 2.1640                   |
| $X_2$                                                                 | 2.9968   | 2.9735    | -0.8%  | 2.9833                   | 2.9691   | 2.6426    | -11.0% | 2.8306                   | 3.0947   | 2.3190    | -25.1% | 2.7773                   | 3.0014   | 2.9969    | -0.1%  | 3.1593                   |
| $X_3$                                                                 | 0.4821   | 0.4862    | 0.8%   | 0.4772                   | 0.5835   | 0.5395    | -7.5%  | 0.5740                   | 0.5587   | 0.4250    | -23.9% | 0.5169                   | 0.5007   | 0.6588    | 31.6%  | 0.6189                   |
| $\sigma_e = 0.5, X_2 \sim Uniform(-0.5,0.5), X_3 \sim Bernoulli(0.3)$ |          |           |        |                          |          |           |        |                          |          |           |        |                          |          |           |        |                          |
| <i>C</i>                                                              | 1.0058   | 1.0081    | 0.2%   | 1.0068                   | 0.9271   | 0.8304    | -10.4% | 0.9030                   | 0.9682   | 0.7348    | -24.1% | 0.8877                   | 0.9993   | 2.2014    | 120.3% | 1.8485                   |
| $X_1$                                                                 | 1.9998   | 1.6025    | -19.9% | 1.9389                   | 1.9437   | 1.3929    | -28.3% | 1.7986                   | 1.9325   | 1.2028    | -37.8% | 1.6760                   | 1.9998   | 1.7477    | -12.6% | 2.1329                   |
| $X_2$                                                                 | 3.0028   | 3.0055    | 0.1%   | 3.0084                   | 2.8906   | 2.6027    | -10.0% | 2.8252                   | 2.8895   | 2.2183    | -23.2% | 2.6359                   | 3.0006   | 2.3929    | -20.3% | 2.3571                   |
| $X_3$                                                                 | 0.4974   | 0.5032    | 1.2%   | 0.4790                   | 0.5386   | 0.4639    | -13.9% | 0.5229                   | 0.4464   | 0.3597    | -19.4% | 0.3900                   | 0.4990   | 0.1417    | -71.6% | 0.0658                   |

7)  $X_1$  follows  $N(0,1^2)$  and has measurement error with  $\sigma_e = 0.1$ ;  $X_2$  follows Bernoulli distribution with  $Pr(X_2 = 1)$  equals 0.7, 0.5, or 0.3;  $X_3$  follows normal distribution with standard deviation 0.5, 1, or 2.

|                                                                       | OLS    |        |       |             | Logit  |        |       |             | Probit |        |       |             | Poisson |        |       |             |
|-----------------------------------------------------------------------|--------|--------|-------|-------------|--------|--------|-------|-------------|--------|--------|-------|-------------|---------|--------|-------|-------------|
|                                                                       | $b$    | $b'$   | %     | $b_{simex}$ | $b$    | $b'$   | %     | $b_{simex}$ | $b$    | $b'$   | %     | $b_{simex}$ | $b$     | $b'$   | %     | $b_{simex}$ |
| $\sigma_e = 0.1, X_2 \sim \text{Bernoulli}(0.7), X_3 \sim N(0,0.5^2)$ |        |        |       |             |        |        |       |             |        |        |       |             |         |        |       |             |
| $C$                                                                   | 1.0132 | 1.0128 | -0.0% | 1.0173      | 1.1562 | 1.1549 | -0.1% | 1.1607      | 0.9081 | 0.8913 | -1.8% | 0.9078      | 0.9899  | 0.9910 | 0.1%  | 0.9684      |
| $X_1$                                                                 | 2.0000 | 1.9787 | -1.1% | 2.0005      | 2.1216 | 2.0752 | -2.2% | 2.1116      | 1.9276 | 1.8616 | -3.4% | 1.9168      | 1.9997  | 1.9674 | -1.6% | 1.9871      |
| $X_2$                                                                 | 2.9904 | 2.9882 | -0.1% | 2.9846      | 2.9345 | 2.9082 | -0.9% | 2.9304      | 2.9102 | 2.8233 | -3.0% | 2.8759      | 3.0113  | 3.0513 | 1.3%  | 3.0506      |
| $X_3$                                                                 | 0.5273 | 0.5253 | -0.4% | 0.5270      | 0.4573 | 0.4334 | -5.2% | 0.4346      | 0.5612 | 0.5604 | -0.1% | 0.5767      | 0.4972  | 0.4961 | -0.2% | 0.5048      |
| $\sigma_e = 0.1, X_2 \sim \text{Bernoulli}(0.7), X_3 \sim N(0,1^2)$   |        |        |       |             |        |        |       |             |        |        |       |             |         |        |       |             |
| $C$                                                                   | 1.0037 | 1.0033 | -0.0% | 1.0024      | 0.9219 | 0.9249 | 0.3%  | 0.9309      | 1.0290 | 1.0077 | -2.1% | 1.0302      | 1.0106  | 1.0265 | 1.6%  | 0.9853      |
| $X_1$                                                                 | 2.0006 | 1.9802 | -1.0% | 2.0013      | 1.9459 | 1.9231 | -1.2% | 1.9558      | 2.0829 | 2.0213 | -3.0% | 2.0899      | 2.0000  | 1.9829 | -0.9% | 2.0137      |
| $X_2$                                                                 | 2.9766 | 2.9756 | -0.0% | 2.9759      | 2.9323 | 2.9174 | -0.5% | 2.9362      | 3.1859 | 3.1273 | -1.8% | 3.1994      | 2.9894  | 2.9941 | 0.2%  | 3.0003      |
| $X_3$                                                                 | 0.4955 | 0.4947 | -0.2% | 0.4966      | 0.4985 | 0.5021 | 0.7%  | 0.5029      | 0.5616 | 0.5500 | -2.1% | 0.5658      | 0.4994  | 0.5007 | 0.3%  | 0.5007      |
| $\sigma_e = 0.1, X_2 \sim \text{Bernoulli}(0.7), X_3 \sim N(0,2^2)$   |        |        |       |             |        |        |       |             |        |        |       |             |         |        |       |             |
| $C$                                                                   | 0.9839 | 0.9861 | 0.2%  | 0.9895      | 1.0276 | 1.0206 | -0.7% | 1.0292      | 1.0058 | 1.0063 | 0.0%  | 1.0226      | 0.9999  | 1.1347 | 13.5% | 1.1609      |
| $X_1$                                                                 | 1.9912 | 1.9708 | -1.0% | 1.9904      | 1.9322 | 1.9003 | -1.6% | 1.9308      | 1.9862 | 1.9590 | -1.4% | 2.0152      | 1.9995  | 1.9294 | -3.5% | 1.9289      |
| $X_2$                                                                 | 3.0195 | 3.0180 | -0.1% | 3.0152      | 2.9057 | 2.8863 | -0.7% | 2.9007      | 2.9092 | 2.8815 | -1.0% | 2.9403      | 3.0011  | 2.9594 | -1.4% | 2.9490      |
| $X_3$                                                                 | 0.4968 | 0.4957 | -0.2% | 0.4957      | 0.5152 | 0.5080 | -1.4% | 0.5113      | 0.5200 | 0.5199 | -0.0% | 0.5291      | 0.5003  | 0.4919 | -1.7% | 0.4879      |
| $\sigma_e = 0.1, X_2 \sim \text{Bernoulli}(0.5), X_3 \sim N(0,0.5^2)$ |        |        |       |             |        |        |       |             |        |        |       |             |         |        |       |             |
| $C$                                                                   | 1.0010 | 0.9977 | -0.3% | 0.9967      | 0.9122 | 0.9030 | -1.0% | 0.9108      | 0.9845 | 0.9600 | -2.5% | 0.9816      | 1.0019  | 1.0671 | 6.5%  | 1.0486      |
| $X_1$                                                                 | 1.9988 | 1.9800 | -0.9% | 2.0001      | 1.9926 | 1.9536 | -2.0% | 1.9864      | 2.0560 | 1.9802 | -3.7% | 2.0472      | 2.0002  | 1.9533 | -2.3% | 1.9736      |
| $X_2$                                                                 | 3.0036 | 3.0071 | 0.1%  | 3.0087      | 3.2817 | 3.2562 | -0.8% | 3.2730      | 3.1741 | 3.0811 | -2.9% | 3.1565      | 2.9972  | 2.9917 | -0.2% | 2.9941      |
| $X_3$                                                                 | 0.4699 | 0.4675 | -0.5% | 0.4663      | 0.4822 | 0.4781 | -0.9% | 0.4799      | 0.5075 | 0.5038 | -0.7% | 0.5155      | 0.5002  | 0.5087 | 1.7%  | 0.5004      |
| $\sigma_e = 0.1, X_2 \sim \text{Bernoulli}(0.5), X_3 \sim N(0,1^2)$   |        |        |       |             |        |        |       |             |        |        |       |             |         |        |       |             |
| $C$                                                                   | 1.0109 | 1.0095 | -0.1% | 1.0110      | 1.0258 | 1.0229 | -0.3% | 1.0294      | 0.9713 | 0.9414 | -3.1% | 0.9559      | 1.0035  | 1.0055 | 0.2%  | 1.0037      |
| $X_1$                                                                 | 2.0113 | 1.9952 | -0.8% | 2.0132      | 2.1308 | 2.1128 | -0.8% | 2.1472      | 1.9846 | 1.8995 | -4.3% | 1.9543      | 1.9995  | 1.9936 | -0.3% | 2.0005      |
| $X_2$                                                                 | 2.9885 | 2.9886 | 0.0%  | 2.9869      | 3.0069 | 2.9950 | -0.4% | 3.0157      | 3.0657 | 2.9697 | -3.1% | 3.0301      | 2.9972  | 3.0079 | 0.4%  | 3.0061      |
| $X_3$                                                                 | 0.5063 | 0.4990 | -1.4% | 0.4986      | 0.5356 | 0.5317 | -0.7% | 0.5352      | 0.5288 | 0.5163 | -2.4% | 0.5257      | 0.4983  | 0.4939 | -0.9% | 0.4870      |
| $\sigma_e = 0.1, X_2 \sim \text{Bernoulli}(0.5), X_3 \sim N(0,2^2)$   |        |        |       |             |        |        |       |             |        |        |       |             |         |        |       |             |
| $C$                                                                   | 1.0120 | 1.0157 | 0.4%  | 1.0176      | 0.9796 | 0.9697 | -1.0% | 0.9766      | 0.9342 | 0.9082 | -2.8% | 0.9214      | 1.0031  | 0.9599 | -4.3% | 0.9058      |
| $X_1$                                                                 | 2.0097 | 1.9902 | -1.0% | 2.0107      | 1.9398 | 1.9074 | -1.7% | 1.9373      | 1.8013 | 1.7445 | -3.2% | 1.7880      | 2.0003  | 2.0447 | 2.2%  | 2.0824      |
| $X_2$                                                                 | 2.9791 | 2.9734 | -0.2% | 2.9705      | 2.8339 | 2.8138 | -0.7% | 2.8296      | 2.7562 | 2.7035 | -1.9% | 2.7466      | 2.9977  | 3.0067 | 0.3%  | 3.0132      |
| $X_3$                                                                 | 0.4981 | 0.5003 | 0.4%  | 0.5003      | 0.4830 | 0.4774 | -1.1% | 0.4796      | 0.4514 | 0.4440 | -1.6% | 0.4504      | 0.4999  | 0.4842 | -3.1% | 0.4833      |
| $\sigma_e = 0.1, X_2 \sim \text{Bernoulli}(0.7), X_3 \sim N(0,0.5^2)$ |        |        |       |             |        |        |       |             |        |        |       |             |         |        |       |             |
| $C$                                                                   | 1.0021 | 1.0049 | 0.3%  | 1.0029      | 0.9156 | 0.9112 | -0.5% | 0.9182      | 1.0390 | 1.0283 | -1.0% | 1.0500      | 1.0016  | 0.9836 | -1.8% | 0.9499      |
| $X_1$                                                                 | 1.9857 | 1.9615 | -1.2% | 1.9811      | 1.9157 | 1.8738 | -2.2% | 1.9038      | 1.9964 | 1.9527 | -2.2% | 2.0086      | 2.0010  | 1.9906 | -0.5% | 2.0172      |
| $X_2$                                                                 | 3.0014 | 2.9910 | -0.3% | 2.9942      | 2.9721 | 2.9420 | -1.0% | 2.9561      | 2.9795 | 2.9220 | -1.9% | 2.9790      | 2.9960  | 2.9981 | 0.1%  | 3.0033      |
| $X_3$                                                                 | 0.5037 | 0.5025 | -0.3% | 0.5008      | 0.5061 | 0.5017 | -0.9% | 0.5037      | 0.6136 | 0.6006 | -2.1% | 0.6130      | 0.4983  | 0.5059 | 1.5%  | 0.5084      |
| $\sigma_e = 0.1, X_2 \sim \text{Bernoulli}(0.7), X_3 \sim N(0,1^2)$   |        |        |       |             |        |        |       |             |        |        |       |             |         |        |       |             |
| $C$                                                                   | 1.0009 | 1.0065 | 0.6%  | 1.0057      | 0.9748 | 0.9599 | -1.5% | 0.9653      | 1.0085 | 0.9839 | -2.4% | 1.0020      | 1.0018  | 1.0299 | 2.8%  | 1.0114      |
| $X_1$                                                                 | 2.0191 | 2.0016 | -0.9% | 2.0230      | 1.8972 | 1.8587 | -2.0% | 1.8877      | 1.9616 | 1.8933 | -3.5% | 1.9467      | 1.9980  | 1.9832 | -0.7% | 1.9993      |
| $X_2$                                                                 | 2.9836 | 2.9784 | -0.2% | 2.9758      | 2.8382 | 2.8143 | -0.8% | 2.8271      | 2.9197 | 2.8442 | -2.6% | 2.9029      | 3.0036  | 2.9604 | -1.4% | 2.9560      |
| $X_3$                                                                 | 0.4909 | 0.4932 | 0.5%  | 0.4929      | 0.4705 | 0.4663 | -0.9% | 0.4697      | 0.4535 | 0.4353 | -4.0% | 0.4407      | 0.4988  | 0.5012 | 0.5%  | 0.5132      |
| $\sigma_e = 0.1, X_2 \sim \text{Bernoulli}(0.7), X_3 \sim N(0,2^2)$   |        |        |       |             |        |        |       |             |        |        |       |             |         |        |       |             |
| $C$                                                                   | 1.0067 | 1.0036 | -0.3% | 1.0040      | 0.9721 | 0.9717 | -0.0% | 0.9784      | 0.9761 | 0.9577 | -1.9% | 0.9791      | 0.9971  | 0.9986 | 0.2%  | 0.9746      |
| $X_1$                                                                 | 1.9972 | 1.9754 | -1.1% | 1.9957      | 2.0181 | 1.9824 | -1.8% | 2.0154      | 2.0454 | 1.9882 | -2.8% | 2.0568      | 2.0003  | 2.0234 | 1.2%  | 2.0421      |
| $X_2$                                                                 | 3.0133 | 3.0186 | 0.2%  | 3.0187      | 2.8542 | 2.8297 | -0.9% | 2.8477      | 3.0068 | 2.9658 | -1.4% | 3.0385      | 3.0011  | 2.9996 | -0.0% | 2.9959      |
| $X_3$                                                                 | 0.4992 | 0.5015 | 0.5%  | 0.5015      | 0.4789 | 0.4743 | -1.0% | 0.4769      | 0.4954 | 0.4880 | -1.5% | 0.4995      | 0.5000  | 0.4680 | -6.4% | 0.4743      |

8)  $X_1$  follows  $N(0,1^2)$  and has measurement error with  $\sigma_e = 0.3$ ;  $X_2$  follows Bernoulli distribution with  $Pr(X_2 = 1)$  equals 0.7, 0.5, or 0.3;  $X_3$  follows normal distribution with standard deviation 0.5, 1, or 2.

|                                                                       | OLS    |        |       |             | Logit  |        |        |             | Probit |        |        |             | Poisson |        |        |             |
|-----------------------------------------------------------------------|--------|--------|-------|-------------|--------|--------|--------|-------------|--------|--------|--------|-------------|---------|--------|--------|-------------|
|                                                                       | $b$    | $b'$   | %     | $b_{simex}$ | $b$    | $b'$   | %      | $b_{simex}$ | $b$    | $b'$   | %      | $b_{simex}$ | $b$     | $b'$   | %      | $b_{simex}$ |
| $\sigma_e = 0.3, X_2 \sim \text{Bernoulli}(0.7), X_3 \sim N(0,0.5^2)$ |        |        |       |             |        |        |        |             |        |        |        |             |         |        |        |             |
| $C$                                                                   | 0.9966 | 0.9933 | -0.3% | 0.9970      | 1.0313 | 0.9543 | -7.5%  | 0.9998      | 1.0489 | 0.9221 | -12.1% | 1.0422      | 0.9921  | 1.1712 | 18.1%  | 1.0017      |
| $X_1$                                                                 | 1.9998 | 1.8300 | -8.5% | 1.9943      | 1.9859 | 1.7209 | -13.3% | 1.9467      | 2.1745 | 1.6715 | -23.1% | 2.0380      | 2.0022  | 1.8142 | -9.4%  | 2.0096      |
| $X_2$                                                                 | 3.0177 | 3.0093 | -0.3% | 3.0095      | 2.9783 | 2.8598 | -4.0%  | 2.9930      | 3.2456 | 2.7097 | -16.5% | 3.0637      | 3.0036  | 3.0497 | 1.5%   | 3.0193      |
| $X_3$                                                                 | 0.5073 | 0.5048 | -0.5% | 0.5057      | 0.6059 | 0.5416 | -10.6% | 0.5625      | 0.5191 | 0.4472 | -13.8% | 0.4937      | 0.5002  | 0.4534 | -9.4%  | 0.5194      |
| $\sigma_e = 0.3, X_2 \sim \text{Bernoulli}(0.7), X_3 \sim N(0,1^2)$   |        |        |       |             |        |        |        |             |        |        |        |             |         |        |        |             |
| $C$                                                                   | 1.0036 | 0.9777 | -2.6% | 0.9745      | 1.0753 | 1.0143 | -5.7%  | 1.0638      | 0.9664 | 0.8744 | -9.5%  | 1.0148      | 0.9954  | 1.0772 | 8.2%   | 1.0154      |
| $X_1$                                                                 | 1.9987 | 1.8300 | -8.4% | 1.9880      | 1.9116 | 1.6703 | -12.6% | 1.8782      | 2.0271 | 1.6900 | -16.6% | 2.1086      | 2.0011  | 1.8516 | -7.5%  | 1.9655      |
| $X_2$                                                                 | 2.9812 | 3.0051 | 0.8%  | 3.0076      | 2.8151 | 2.6842 | -4.7%  | 2.7856      | 3.0337 | 2.7339 | -9.9%  | 3.1518      | 2.9999  | 3.0696 | 2.3%   | 3.0279      |
| $X_3$                                                                 | 0.4902 | 0.4991 | 1.8%  | 0.5048      | 0.4983 | 0.4673 | -6.2%  | 0.4894      | 0.4548 | 0.4225 | -7.1%  | 0.4928      | 0.5008  | 0.5218 | 4.2%   | 0.5495      |
| $\sigma_e = 0.3, X_2 \sim \text{Bernoulli}(0.7), X_3 \sim N(0,2^2)$   |        |        |       |             |        |        |        |             |        |        |        |             |         |        |        |             |
| $C$                                                                   | 1.0101 | 1.0174 | 0.7%  | 1.0139      | 0.9690 | 0.9351 | -3.5%  | 0.9775      | 1.0903 | 0.9786 | -10.2% | 1.0957      | 0.9937  | 1.3898 | 39.9%  | 1.2008      |
| $X_1$                                                                 | 2.0099 | 1.8557 | -7.7% | 2.0171      | 1.9222 | 1.6964 | -11.7% | 1.9315      | 2.0379 | 1.6726 | -17.9% | 1.9980      | 2.0008  | 1.7782 | -11.1% | 1.9629      |
| $X_2$                                                                 | 2.9892 | 2.9973 | 0.3%  | 3.0013      | 2.9589 | 2.8032 | -5.3%  | 2.9426      | 3.0125 | 2.6753 | -11.2% | 2.9966      | 3.0059  | 2.8627 | -4.8%  | 2.8715      |
| $X_3$                                                                 | 0.5002 | 0.5037 | 0.7%  | 0.5044      | 0.4907 | 0.4678 | -4.7%  | 0.4888      | 0.5344 | 0.4697 | -12.1% | 0.5293      | 0.4998  | 0.4659 | -6.8%  | 0.4635      |
| $\sigma_e = 0.3, X_2 \sim \text{Bernoulli}(0.5), X_3 \sim N(0,0.5^2)$ |        |        |       |             |        |        |        |             |        |        |        |             |         |        |        |             |
| $C$                                                                   | 1.0164 | 0.9971 | -1.9% | 0.9978      | 0.9453 | 0.8991 | -4.9%  | 0.9523      | 1.1099 | 0.9437 | -15.0% | 1.0611      | 1.0036  | 1.1220 | 11.8%  | 0.9385      |
| $X_1$                                                                 | 2.0059 | 1.8336 | -8.6% | 1.9865      | 2.0617 | 1.7752 | -13.9% | 2.0266      | 2.0665 | 1.6155 | -21.8% | 1.9480      | 1.9997  | 1.8331 | -8.3%  | 2.0424      |
| $X_2$                                                                 | 2.9882 | 2.9981 | 0.3%  | 2.9954      | 3.0523 | 2.8536 | -6.5%  | 3.0059      | 2.8800 | 2.4200 | -16.0% | 2.7058      | 2.9989  | 3.0465 | 1.6%   | 3.0130      |
| $X_3$                                                                 | 0.5033 | 0.4864 | -3.4% | 0.4762      | 0.4962 | 0.4779 | -3.7%  | 0.5113      | 0.4487 | 0.3438 | -23.4% | 0.3830      | 0.4981  | 0.3655 | -26.6% | 0.4311      |
| $\sigma_e = 0.3, X_2 \sim \text{Bernoulli}(0.5), X_3 \sim N(0,1^2)$   |        |        |       |             |        |        |        |             |        |        |        |             |         |        |        |             |
| $C$                                                                   | 1.0018 | 0.9989 | -0.3% | 0.9960      | 0.9907 | 0.9510 | -4.0%  | 0.9921      | 0.9467 | 0.8136 | -14.1% | 0.9118      | 0.9961  | 1.0238 | 2.8%   | 0.8992      |
| $X_1$                                                                 | 1.9998 | 1.8362 | -8.2% | 1.9927      | 1.9765 | 1.7377 | -12.1% | 1.9695      | 1.9706 | 1.5776 | -19.9% | 1.9007      | 2.0002  | 1.9302 | -3.5%  | 2.0678      |
| $X_2$                                                                 | 3.0069 | 3.0236 | 0.6%  | 3.0290      | 3.0801 | 2.9439 | -4.4%  | 3.0909      | 2.9474 | 2.5753 | -12.6% | 2.8959      | 3.0032  | 3.0513 | 1.6%   | 3.0203      |
| $X_3$                                                                 | 0.5085 | 0.5072 | -0.3% | 0.5091      | 0.4918 | 0.4623 | -6.0%  | 0.4851      | 0.4599 | 0.3986 | -13.3% | 0.4408      | 0.5005  | 0.4371 | -12.7% | 0.4844      |
| $\sigma_e = 0.3, X_2 \sim \text{Bernoulli}(0.5), X_3 \sim N(0,2^2)$   |        |        |       |             |        |        |        |             |        |        |        |             |         |        |        |             |
| $C$                                                                   | 1.0148 | 1.0159 | 0.1%  | 1.0235      | 0.9332 | 0.8931 | -4.3%  | 0.9337      | 0.9894 | 0.8525 | -13.8% | 0.9580      | 1.0028  | 1.1455 | 14.2%  | 1.0353      |
| $X_1$                                                                 | 2.0044 | 1.8459 | -7.9% | 2.0010      | 1.9293 | 1.6879 | -12.5% | 1.9059      | 1.9993 | 1.5278 | -23.6% | 1.8307      | 1.9990  | 1.8709 | -6.4%  | 2.0225      |
| $X_2$                                                                 | 2.9769 | 2.9863 | 0.3%  | 2.9816      | 3.0267 | 2.8752 | -5.0%  | 2.9840      | 3.0152 | 2.5352 | -15.9% | 2.8130      | 3.0001  | 3.0683 | 2.3%   | 2.9989      |
| $X_3$                                                                 | 0.4990 | 0.4987 | -0.1% | 0.5010      | 0.4660 | 0.4358 | -6.5%  | 0.4538      | 0.4941 | 0.4284 | -13.3% | 0.4715      | 0.5000  | 0.4812 | -3.7%  | 0.4828      |
| $\sigma_e = 0.3, X_2 \sim \text{Bernoulli}(0.7), X_3 \sim N(0,0.5^2)$ |        |        |       |             |        |        |        |             |        |        |        |             |         |        |        |             |
| $C$                                                                   | 0.9928 | 1.0038 | 1.1%  | 0.9988      | 0.9677 | 0.9255 | -4.4%  | 0.9703      | 1.0010 | 0.8894 | -11.1% | 0.9892      | 0.9967  | 1.2543 | 25.8%  | 1.1952      |
| $X_1$                                                                 | 1.9953 | 1.8373 | -7.9% | 1.9949      | 1.9152 | 1.6721 | -12.7% | 1.9010      | 1.9299 | 1.5655 | -18.9% | 1.8835      | 1.9988  | 1.7575 | -12.1% | 1.8674      |
| $X_2$                                                                 | 3.0020 | 3.0027 | 0.0%  | 3.0015      | 2.9807 | 2.8447 | -4.6%  | 2.9834      | 2.9608 | 2.5642 | -13.4% | 2.8712      | 3.0076  | 2.9856 | -0.7%  | 2.9402      |
| $X_3$                                                                 | 0.4778 | 0.4802 | 0.5%  | 0.4774      | 0.4630 | 0.4199 | -9.3%  | 0.4353      | 0.4932 | 0.4369 | -11.4% | 0.4968      | 0.5021  | 0.5633 | 12.2%  | 0.5413      |
| $\sigma_e = 0.3, X_2 \sim \text{Bernoulli}(0.7), X_3 \sim N(0,1^2)$   |        |        |       |             |        |        |        |             |        |        |        |             |         |        |        |             |
| $C$                                                                   | 1.0103 | 1.0124 | 0.2%  | 1.0183      | 1.1029 | 1.0105 | -8.4%  | 1.0736      | 1.0196 | 0.8807 | -13.6% | 0.9773      | 0.9988  | 1.3232 | 32.5%  | 1.2144      |
| $X_1$                                                                 | 2.0037 | 1.8358 | -8.4% | 1.9928      | 2.0837 | 1.7950 | -13.9% | 2.0457      | 1.9905 | 1.5788 | -20.7% | 1.9003      | 1.9990  | 1.7361 | -13.2% | 1.8842      |
| $X_2$                                                                 | 2.9802 | 2.9775 | -0.1% | 2.9619      | 3.0117 | 2.8564 | -5.2%  | 2.9694      | 2.9549 | 2.5782 | -12.7% | 2.8820      | 3.0037  | 2.9730 | -1.0%  | 2.9390      |
| $X_3$                                                                 | 0.5042 | 0.5052 | 0.2%  | 0.5028      | 0.5366 | 0.5109 | -4.8%  | 0.5349      | 0.5552 | 0.4775 | -14.0% | 0.5337      | 0.4988  | 0.4336 | -13.1% | 0.4336      |
| $\sigma_e = 0.3, X_2 \sim \text{Bernoulli}(0.7), X_3 \sim N(0,2^2)$   |        |        |       |             |        |        |        |             |        |        |        |             |         |        |        |             |
| $C$                                                                   | 1.0169 | 1.0144 | -0.3% | 1.0172      | 1.0004 | 0.9338 | -6.7%  | 0.9840      | 1.0135 | 0.8860 | -12.6% | 0.9897      | 0.9984  | 0.8592 | -13.9% | 1.0582      |
| $X_1$                                                                 | 2.0040 | 1.8359 | -8.4% | 1.9980      | 2.0358 | 1.7738 | -12.9% | 2.0241      | 1.9897 | 1.6074 | -19.2% | 1.9480      | 2.0012  | 1.8955 | -5.3%  | 1.9381      |
| $X_2$                                                                 | 3.0001 | 2.9903 | -0.3% | 2.9943      | 3.0574 | 2.8796 | -5.8%  | 3.0433      | 2.9446 | 2.5825 | -12.3% | 2.9201      | 3.0002  | 3.0274 | 0.9%   | 2.9297      |
| $X_3$                                                                 | 0.4944 | 0.4933 | -0.2% | 0.4911      | 0.5414 | 0.4999 | -7.7%  | 0.5268      | 0.5151 | 0.4525 | -12.2% | 0.5071      | 0.4999  | 0.6033 | 20.7%  | 0.5581      |

9)  $X_1$  follows  $N(0,1^2)$  and has measurement error with  $\sigma_e = 0.5$ ;  $X_2$  follows Bernoulli distribution with  $Pr(X_2 = 1)$  equals 0.7, 0.5, or 0.3;  $X_3$  follows normal distribution with standard deviation 0.5, 1, or 2.

|                                                                       | OLS    |        |        |             | Logit  |        |        |             | Probit |        |        |             | Poisson |        |        |             |
|-----------------------------------------------------------------------|--------|--------|--------|-------------|--------|--------|--------|-------------|--------|--------|--------|-------------|---------|--------|--------|-------------|
|                                                                       | $b$    | $b'$   | %      | $b_{simex}$ | $b$    | $b'$   | %      | $b_{simex}$ | $b$    | $b'$   | %      | $b_{simex}$ | $b$     | $b'$   | %      | $b_{simex}$ |
| $\sigma_e = 0.5, X_2 \sim \text{Bernoulli}(0.7), X_3 \sim N(0,0.5^2)$ |        |        |        |             |        |        |        |             |        |        |        |             |         |        |        |             |
| $C$                                                                   | 0.9940 | 1.0152 | 2.1%   | 1.0427      | 1.1168 | 0.9888 | -11.5% | 1.0772      | 1.0299 | 0.7365 | -28.5% | 0.8642      | 1.0069  | 1.3524 | 34.3%  | 0.9410      |
| $X_1$                                                                 | 1.9990 | 1.5836 | -20.8% | 1.9260      | 1.9979 | 1.4380 | -28.0% | 1.8586      | 2.0025 | 1.2238 | -38.9% | 1.7079      | 1.9988  | 1.5642 | -21.7% | 1.9501      |
| $X_2$                                                                 | 3.0207 | 3.0032 | -0.6%  | 2.9777      | 2.8757 | 2.5666 | -10.7% | 2.7823      | 2.9492 | 2.2547 | -23.5% | 2.7086      | 2.9966  | 3.1423 | 4.9%   | 3.1501      |
| $X_3$                                                                 | 0.4810 | 0.4544 | -5.5%  | 0.4768      | 0.5134 | 0.4656 | -9.3%  | 0.5006      | 0.5727 | 0.4795 | -16.3% | 0.5707      | 0.5007  | 0.4909 | -2.0%  | 0.4768      |
| $\sigma_e = 0.5, X_2 \sim \text{Bernoulli}(0.7), X_3 \sim N(0,1^2)$   |        |        |        |             |        |        |        |             |        |        |        |             |         |        |        |             |
| $C$                                                                   | 1.0252 | 1.0306 | 0.5%   | 1.0437      | 1.0074 | 0.9068 | -10.0% | 1.0072      | 0.9722 | 0.6989 | -28.1% | 0.7860      | 0.9967  | 1.3114 | 31.6%  | 0.8667      |
| $X_1$                                                                 | 1.9958 | 1.5917 | -20.2% | 1.9262      | 2.0352 | 1.5073 | -25.9% | 1.9567      | 1.9269 | 1.1165 | -42.1% | 1.5211      | 2.0009  | 1.6154 | -19.3% | 1.9585      |
| $X_2$                                                                 | 2.9734 | 2.9726 | -0.0%  | 2.9547      | 3.0461 | 2.8256 | -7.2%  | 3.0599      | 2.9785 | 2.1747 | -27.0% | 2.5448      | 3.0028  | 3.0829 | 2.7%   | 3.2034      |
| $X_3$                                                                 | 0.4845 | 0.4767 | -1.6%  | 0.4764      | 0.4997 | 0.4648 | -7.0%  | 0.4940      | 0.4895 | 0.3413 | -30.3% | 0.3953      | 0.4996  | 0.4712 | -5.7%  | 0.5051      |
| $\sigma_e = 0.5, X_2 \sim \text{Bernoulli}(0.7), X_3 \sim N(0,2^2)$   |        |        |        |             |        |        |        |             |        |        |        |             |         |        |        |             |
| $C$                                                                   | 1.0246 | 0.9971 | -2.7%  | 0.9951      | 0.9737 | 0.8705 | -10.6% | 0.9644      | 0.9814 | 0.7266 | -26.0% | 0.8614      | 0.9936  | 1.3000 | 30.8%  | 1.3221      |
| $X_1$                                                                 | 1.9976 | 1.5886 | -20.5% | 1.9319      | 1.9547 | 1.4043 | -28.2% | 1.8103      | 2.0255 | 1.1748 | -42.0% | 1.6239      | 2.0002  | 1.5984 | -20.1% | 1.8373      |
| $X_2$                                                                 | 2.9923 | 3.0307 | 1.3%   | 3.0357      | 2.9866 | 2.6541 | -11.1% | 2.8458      | 3.0847 | 2.2718 | -26.4% | 2.6537      | 3.0058  | 2.8536 | -5.1%  | 2.8158      |
| $X_3$                                                                 | 0.5016 | 0.4908 | -2.2%  | 0.4861      | 0.5042 | 0.4543 | -9.9%  | 0.4949      | 0.4914 | 0.3622 | -26.3% | 0.4268      | 0.5005  | 0.6291 | 25.7%  | 0.5354      |
| $\sigma_e = 0.5, X_2 \sim \text{Bernoulli}(0.5), X_3 \sim N(0,0.5^2)$ |        |        |        |             |        |        |        |             |        |        |        |             |         |        |        |             |
| $C$                                                                   | 0.9745 | 0.9868 | 1.3%   | 0.9837      | 1.0979 | 0.9836 | -10.4% | 1.0850      | 1.0760 | 0.8120 | -24.5% | 0.9650      | 0.9970  | 1.4447 | 44.9%  | 1.1067      |
| $X_1$                                                                 | 2.0083 | 1.5715 | -21.8% | 1.9255      | 2.0321 | 1.4697 | -27.7% | 1.9262      | 2.1008 | 1.2603 | -40.0% | 1.7563      | 2.0002  | 1.6039 | -19.8% | 1.9693      |
| $X_2$                                                                 | 3.0180 | 3.0107 | -0.2%  | 3.0045      | 3.0902 | 2.8084 | -9.1%  | 3.0636      | 2.9556 | 2.2041 | -25.4% | 2.6357      | 3.0031  | 2.9927 | -0.3%  | 2.9452      |
| $X_3$                                                                 | 0.5080 | 0.5383 | 6.0%   | 0.5530      | 0.5788 | 0.5449 | -5.9%  | 0.6138      | 0.6177 | 0.4465 | -27.7% | 0.5614      | 0.4980  | 0.3795 | -23.8% | 0.4982      |
| $\sigma_e = 0.5, X_2 \sim \text{Bernoulli}(0.5), X_3 \sim N(0,1^2)$   |        |        |        |             |        |        |        |             |        |        |        |             |         |        |        |             |
| $C$                                                                   | 1.0056 | 1.0503 | 4.4%   | 1.0518      | 0.9522 | 0.7730 | -18.8% | 0.8504      | 1.0393 | 0.7155 | -31.2% | 0.8361      | 0.9937  | 1.6622 | 67.3%  | 1.3432      |
| $X_1$                                                                 | 1.9959 | 1.5801 | -20.8% | 1.9122      | 2.0469 | 1.4290 | -30.2% | 1.8409      | 2.0394 | 1.1491 | -43.7% | 1.5895      | 2.0022  | 1.5740 | -21.4% | 1.9144      |
| $X_2$                                                                 | 2.9940 | 2.9441 | -1.7%  | 2.9330      | 3.0951 | 2.7696 | -10.5% | 3.0093      | 3.0792 | 2.1890 | -28.9% | 2.5623      | 3.0035  | 2.6716 | -11.1% | 2.6363      |
| $X_3$                                                                 | 0.4944 | 0.4909 | -0.7%  | 0.4924      | 0.4406 | 0.3852 | -12.6% | 0.4156      | 0.4953 | 0.3412 | -31.1% | 0.3996      | 0.4987  | 0.4255 | -14.7% | 0.4380      |
| $\sigma_e = 0.5, X_2 \sim \text{Bernoulli}(0.5), X_3 \sim N(0,2^2)$   |        |        |        |             |        |        |        |             |        |        |        |             |         |        |        |             |
| $C$                                                                   | 1.0082 | 0.9889 | -1.9%  | 0.9951      | 1.0592 | 0.9384 | -11.4% | 1.0242      | 0.9196 | 0.6814 | -25.9% | 0.7894      | 0.9955  | 1.2447 | 25.0%  | 0.9474      |
| $X_1$                                                                 | 2.0049 | 1.5947 | -20.5% | 1.9316      | 2.0412 | 1.4205 | -30.4% | 1.8489      | 1.9472 | 1.1453 | -41.2% | 1.5549      | 2.0002  | 1.7026 | -14.9% | 2.0255      |
| $X_2$                                                                 | 2.9907 | 2.9822 | -0.3%  | 2.9729      | 3.0597 | 2.6843 | -12.3% | 2.9300      | 3.1165 | 2.3267 | -25.3% | 2.6831      | 3.0041  | 2.8170 | -6.2%  | 2.7986      |
| $X_3$                                                                 | 0.5032 | 0.5021 | -0.2%  | 0.4971      | 0.5328 | 0.4743 | -11.0% | 0.5170      | 0.5142 | 0.3748 | -27.1% | 0.4338      | 0.5003  | 0.5573 | 11.4%  | 0.5361      |
| $\sigma_e = 0.5, X_2 \sim \text{Bernoulli}(0.7), X_3 \sim N(0,0.5^2)$ |        |        |        |             |        |        |        |             |        |        |        |             |         |        |        |             |
| $C$                                                                   | 0.9901 | 1.0097 | 2.0%   | 1.0077      | 1.0530 | 0.8913 | -15.4% | 0.9905      | 1.0448 | 0.7638 | -26.9% | 0.9056      | 1.0091  | 1.5509 | 53.7%  | 1.3664      |
| $X_1$                                                                 | 1.9978 | 1.5889 | -20.5% | 1.9296      | 2.1204 | 1.4543 | -31.4% | 1.9001      | 2.0713 | 1.2476 | -39.8% | 1.7276      | 1.9978  | 1.5193 | -24.0% | 1.8072      |
| $X_2$                                                                 | 2.9903 | 2.9508 | -1.3%  | 2.9604      | 3.1082 | 2.7883 | -10.3% | 3.0578      | 3.0395 | 2.3444 | -22.9% | 2.7716      | 2.9956  | 2.9839 | -0.4%  | 2.8436      |
| $X_3$                                                                 | 0.4890 | 0.4744 | -3.0%  | 0.4927      | 0.4668 | 0.4111 | -11.9% | 0.4524      | 0.4613 | 0.3625 | -21.4% | 0.4191      | 0.5009  | 0.4373 | -12.7% | 0.4366      |
| $\sigma_e = 0.5, X_2 \sim \text{Bernoulli}(0.7), X_3 \sim N(0,1^2)$   |        |        |        |             |        |        |        |             |        |        |        |             |         |        |        |             |
| $C$                                                                   | 1.0101 | 1.0274 | 1.7%   | 1.0276      | 1.0059 | 0.9047 | -10.1% | 0.9792      | 0.9969 | 0.7288 | -26.9% | 0.8582      | 0.9915  | 1.3583 | 37.0%  | 0.9464      |
| $X_1$                                                                 | 1.9964 | 1.5965 | -20.0% | 1.9402      | 2.0244 | 1.4236 | -29.7% | 1.8647      | 1.9837 | 1.1740 | -40.8% | 1.6138      | 2.0007  | 1.5732 | -21.4% | 1.9600      |
| $X_2$                                                                 | 2.9941 | 2.9519 | -1.4%  | 2.9615      | 2.9385 | 2.5888 | -11.9% | 2.8400      | 3.0962 | 2.3357 | -24.6% | 2.7092      | 3.0081  | 3.0953 | 2.9%   | 3.1073      |
| $X_3$                                                                 | 0.5007 | 0.4927 | -1.6%  | 0.4926      | 0.4391 | 0.3887 | -11.5% | 0.4253      | 0.5053 | 0.3793 | -24.9% | 0.4523      | 0.4999  | 0.4013 | -19.7% | 0.4336      |
| $\sigma_e = 0.5, X_2 \sim \text{Bernoulli}(0.7), X_3 \sim N(0,2^2)$   |        |        |        |             |        |        |        |             |        |        |        |             |         |        |        |             |
| $C$                                                                   | 0.9862 | 1.0052 | 1.9%   | 1.0096      | 0.9623 | 0.8786 | -8.7%  | 0.9497      | 1.0793 | 0.7626 | -29.3% | 0.9115      | 0.9929  | 1.2280 | 23.7%  | 0.7078      |
| $X_1$                                                                 | 1.9927 | 1.6140 | -19.0% | 1.9594      | 1.9232 | 1.3969 | -27.4% | 1.8140      | 2.1795 | 1.2445 | -42.9% | 1.7260      | 2.0015  | 1.5868 | -20.7% | 1.9444      |
| $X_2$                                                                 | 3.0255 | 3.0287 | 0.1%   | 3.0186      | 3.0881 | 2.8007 | -9.3%  | 3.0258      | 3.1324 | 2.3097 | -26.3% | 2.7581      | 3.0048  | 3.2092 | 6.8%   | 3.3697      |
| $X_3$                                                                 | 0.5044 | 0.5074 | 0.6%   | 0.5120      | 0.5091 | 0.4633 | -9.0%  | 0.5047      | 0.5503 | 0.3891 | -29.3% | 0.4681      | 0.4998  | 0.5612 | 12.3%  | 0.5808      |

10)  $X_2$  follows *Bernoulli*(0.3) and has misclassification with  $M_{00} = 0.8$ , and  $M_{11} = 0.8$ ;  $X_1$  follows uniform distribution with values in  $[-0.5, 0.5]$ ,  $[-1, 1]$ , or  $[-2, 2]$ ;  $X_3$  follows normal distribution with standard deviation 0.5, 1, or 2.

|                                                                                                                                                      | OLS    |        |        |             | Logit  |        |        |             | Probit |        |        |             | Poisson |        |        |             |
|------------------------------------------------------------------------------------------------------------------------------------------------------|--------|--------|--------|-------------|--------|--------|--------|-------------|--------|--------|--------|-------------|---------|--------|--------|-------------|
|                                                                                                                                                      | $b$    | $b'$   | %      | $b_{simex}$ | $b$    | $b'$   | %      | $b_{simex}$ | $b$    | $b'$   | %      | $b_{simex}$ | $b$     | $b'$   | %      | $b_{simex}$ |
| Scenario (1): $X_2 \sim \text{Bernoulli}(0.3)$ , $M_{00} = 0.8$ , and $M_{11} = 0.8$ , $X_1 \sim \text{Uniform}(-0.5, 0.5)$ , $X_3 \sim N(0, 0.5^2)$ |        |        |        |             |        |        |        |             |        |        |        |             |         |        |        |             |
| $C$                                                                                                                                                  | 1.0029 | 1.2902 | 28.6%  | 1.0195      | 1.0101 | 1.1406 | 12.9%  | 0.9996      | 1.0089 | 1.0606 | 5.1%   | 0.9833      | 0.9974  | 2.0563 | 106.2% | 1.5065      |
| $X_1$                                                                                                                                                | 1.9688 | 1.9443 | -1.2%  | 1.8847      | 2.0765 | 1.9384 | -6.7%  | 2.0017      | 2.0625 | 1.8167 | -11.9% | 1.8846      | 2.0259  | 2.1498 | 6.1%   | 2.2137      |
| $X_2$                                                                                                                                                | 2.9897 | 1.5734 | -47.4% | 2.5259      | 3.1035 | 1.0612 | -65.8% | 1.8204      | 2.6801 | 0.6102 | -77.3% | 1.0409      | 2.9994  | 1.4855 | -50.5% | 2.3884      |
| $X_3$                                                                                                                                                | 0.5075 | 0.5168 | 1.8%   | 0.4927      | 0.4329 | 0.3730 | -13.8% | 0.3970      | 0.5831 | 0.4979 | -14.6% | 0.4932      | 0.4983  | 0.5086 | 2.1%   | 0.5074      |
| Scenario (1): $X_2 \sim \text{Bernoulli}(0.3)$ , $M_{00} = 0.8$ , and $M_{11} = 0.8$ , $X_1 \sim \text{Uniform}(-0.5, 0.5)$ , $X_3 \sim N(0, 1^2)$   |        |        |        |             |        |        |        |             |        |        |        |             |         |        |        |             |
| $C$                                                                                                                                                  | 0.9810 | 1.2864 | 31.1%  | 1.0060      | 0.9376 | 1.0426 | 11.2%  | 0.8970      | 0.9946 | 1.0324 | 3.8%   | 0.9498      | 1.0140  | 1.9466 | 92.0%  | 1.3748      |
| $X_1$                                                                                                                                                | 2.0050 | 2.0242 | 1.0%   | 2.0251      | 2.0388 | 1.9183 | -5.9%  | 2.0097      | 1.8751 | 1.6734 | -10.8% | 1.7231      | 1.9940  | 2.0669 | 3.7%   | 2.0430      |
| $X_2$                                                                                                                                                | 3.0137 | 1.5949 | -47.1% | 2.5596      | 2.8070 | 1.1673 | -58.4% | 2.0016      | 2.9811 | 0.7149 | -76.2% | 1.2353      | 2.9892  | 1.6041 | -46.3% | 2.5392      |
| $X_3$                                                                                                                                                | 0.5054 | 0.4915 | -2.8%  | 0.4899      | 0.5573 | 0.5131 | -7.9%  | 0.5444      | 0.5303 | 0.4495 | -15.2% | 0.4674      | 0.4999  | 0.5257 | 5.2%   | 0.5300      |
| Scenario (1): $X_2 \sim \text{Bernoulli}(0.3)$ , $M_{00} = 0.8$ , and $M_{11} = 0.8$ , $X_1 \sim \text{Uniform}(-0.5, 0.5)$ , $X_3 \sim N(0, 2^2)$   |        |        |        |             |        |        |        |             |        |        |        |             |         |        |        |             |
| $C$                                                                                                                                                  | 1.0161 | 1.3177 | 29.7%  | 1.0407      | 1.0610 | 1.1508 | 8.5%   | 1.0117      | 0.9944 | 0.9826 | -1.2%  | 0.9010      | 0.9994  | 2.0145 | 101.6% | 1.4624      |
| $X_1$                                                                                                                                                | 1.9943 | 1.9283 | -3.3%  | 1.9798      | 1.9875 | 1.8387 | -7.5%  | 1.9209      | 1.9754 | 1.6339 | -17.3% | 1.7354      | 2.0022  | 2.0541 | 2.6%   | 2.0313      |
| $X_2$                                                                                                                                                | 2.9997 | 1.5539 | -48.2% | 2.4914      | 3.0144 | 1.1442 | -62.0% | 1.9063      | 3.1497 | 0.8131 | -74.2% | 1.3901      | 3.0032  | 1.5375 | -48.8% | 2.4479      |
| $X_3$                                                                                                                                                | 0.4960 | 0.4913 | -1.0%  | 0.4921      | 0.4709 | 0.4256 | -9.6%  | 0.4542      | 0.5147 | 0.4046 | -21.4% | 0.4323      | 0.4950  | 0.4412 | -10.9% | 0.4865      |
| Scenario (1): $X_2 \sim \text{Bernoulli}(0.3)$ , $M_{00} = 0.8$ , and $M_{11} = 0.8$ , $X_1 \sim \text{Uniform}(-1, 1)$ , $X_3 \sim N(0, 0.5^2)$     |        |        |        |             |        |        |        |             |        |        |        |             |         |        |        |             |
| $C$                                                                                                                                                  | 1.0069 | 1.2925 | 28.4%  | 1.0114      | 0.9746 | 1.0876 | 11.6%  | 0.9521      | 1.0978 | 1.0805 | -1.6%  | 0.9914      | 1.0032  | 2.0611 | 105.5% | 1.5017      |
| $X_1$                                                                                                                                                | 1.9884 | 1.9514 | -1.9%  | 1.9373      | 2.0499 | 1.8462 | -9.9%  | 1.9416      | 2.2018 | 1.7971 | -18.4% | 1.8974      | 2.0061  | 1.9585 | -2.4%  | 1.9285      |
| $X_2$                                                                                                                                                | 2.9809 | 1.6452 | -44.8% | 2.6085      | 3.0253 | 1.0972 | -63.7% | 1.8207      | 3.3483 | 0.8184 | -75.6% | 1.4033      | 2.9903  | 1.4962 | -50.0% | 2.4052      |
| $X_3$                                                                                                                                                | 0.5065 | 0.4811 | -5.0%  | 0.4837      | 0.5715 | 0.4890 | -14.4% | 0.5203      | 0.5967 | 0.4452 | -25.4% | 0.4666      | 0.5016  | 0.4975 | -0.8%  | 0.5080      |
| Scenario (1): $X_2 \sim \text{Bernoulli}(0.3)$ , $M_{00} = 0.8$ , and $M_{11} = 0.8$ , $X_1 \sim \text{Uniform}(-1, 1)$ , $X_3 \sim N(0, 1^2)$       |        |        |        |             |        |        |        |             |        |        |        |             |         |        |        |             |
| $C$                                                                                                                                                  | 0.9971 | 1.2782 | 28.2%  | 1.0110      | 1.0000 | 1.1107 | 11.1%  | 0.9755      | 1.0313 | 1.0574 | 2.5%   | 0.9811      | 0.9991  | 2.1575 | 115.9% | 1.6503      |
| $X_1$                                                                                                                                                | 2.0154 | 1.9563 | -2.9%  | 1.9528      | 2.0401 | 1.8636 | -8.6%  | 1.9398      | 2.0667 | 1.6857 | -18.4% | 1.7475      | 1.9978  | 1.9149 | -4.2%  | 1.9019      |
| $X_2$                                                                                                                                                | 2.9848 | 1.5732 | -47.3% | 2.5176      | 3.0239 | 1.0403 | -65.6% | 1.7436      | 3.1105 | 0.6834 | -78.0% | 1.1646      | 3.0033  | 1.4586 | -51.4% | 2.2970      |
| $X_3$                                                                                                                                                | 0.4915 | 0.4936 | 0.4%   | 0.5049      | 0.4847 | 0.4377 | -9.7%  | 0.4566      | 0.5073 | 0.3948 | -22.2% | 0.4179      | 0.4984  | 0.4853 | -2.6%  | 0.4938      |
| Scenario (1): $X_2 \sim \text{Bernoulli}(0.3)$ , $M_{00} = 0.8$ , and $M_{11} = 0.8$ , $X_1 \sim \text{Uniform}(-1, 1)$ , $X_3 \sim N(0, 2^2)$       |        |        |        |             |        |        |        |             |        |        |        |             |         |        |        |             |
| $C$                                                                                                                                                  | 0.9794 | 1.2696 | 29.6%  | 0.9917      | 1.0372 | 1.1347 | 9.4%   | 0.9958      | 1.0272 | 1.0093 | -1.7%  | 0.9313      | 1.0066  | 2.1066 | 109.3% | 1.5418      |
| $X_1$                                                                                                                                                | 1.9999 | 1.9682 | -1.6%  | 1.9554      | 2.0681 | 1.8424 | -10.9% | 1.9384      | 1.9934 | 1.4602 | -26.7% | 1.5284      | 1.9971  | 1.9584 | -1.9%  | 1.9477      |
| $X_2$                                                                                                                                                | 3.0163 | 1.6263 | -46.1% | 2.6233      | 2.9897 | 1.2465 | -58.3% | 2.1080      | 3.0905 | 0.7074 | -77.1% | 1.1910      | 2.9986  | 1.5209 | -49.3% | 2.4135      |
| $X_3$                                                                                                                                                | 0.5000 | 0.5076 | 1.5%   | 0.4902      | 0.5015 | 0.4324 | -13.8% | 0.4521      | 0.4870 | 0.3470 | -28.7% | 0.3668      | 0.4918  | 0.3968 | -19.3% | 0.4150      |
| Scenario (1): $X_2 \sim \text{Bernoulli}(0.3)$ , $M_{00} = 0.8$ , and $M_{11} = 0.8$ , $X_1 \sim \text{Uniform}(-2, 2)$ , $X_3 \sim N(0, 0.5^2)$     |        |        |        |             |        |        |        |             |        |        |        |             |         |        |        |             |
| $C$                                                                                                                                                  | 0.9942 | 1.3028 | 31.0%  | 1.0294      | 1.0634 | 1.1320 | 6.4%   | 0.9873      | 1.0306 | 0.9469 | -8.1%  | 0.8674      | 1.0000  | 2.0967 | 109.7% | 1.5810      |
| $X_1$                                                                                                                                                | 1.9962 | 1.9836 | -0.6%  | 1.9885      | 2.0014 | 1.7580 | -12.2% | 1.8659      | 2.0243 | 1.4539 | -28.2% | 1.5909      | 2.0017  | 1.9808 | -1.0%  | 1.9719      |
| $X_2$                                                                                                                                                | 3.0181 | 1.5706 | -48.0% | 2.5133      | 2.8814 | 1.2879 | -55.3% | 2.1341      | 2.9401 | 1.0121 | -65.6% | 1.7165      | 2.9985  | 1.4899 | -50.3% | 2.3981      |
| $X_3$                                                                                                                                                | 0.5093 | 0.5804 | 14.0%  | 0.6211      | 0.4771 | 0.4353 | -8.8%  | 0.4487      | 0.5506 | 0.3324 | -39.6% | 0.3587      | 0.4992  | 0.5551 | 11.2%  | 0.5519      |
| Scenario (1): $X_2 \sim \text{Bernoulli}(0.3)$ , $M_{00} = 0.8$ , and $M_{11} = 0.8$ , $X_1 \sim \text{Uniform}(-2, 2)$ , $X_3 \sim N(0, 1^2)$       |        |        |        |             |        |        |        |             |        |        |        |             |         |        |        |             |
| $C$                                                                                                                                                  | 0.9906 | 1.2681 | 28.0%  | 0.9956      | 0.9812 | 1.0860 | 10.7%  | 0.9265      | 1.0616 | 0.9571 | -9.8%  | 0.8875      | 1.0000  | 1.9776 | 97.8%  | 1.3313      |
| $X_1$                                                                                                                                                | 2.0032 | 1.9892 | -0.7%  | 1.9915      | 2.0108 | 1.7420 | -13.4% | 1.8592      | 2.0652 | 1.3960 | -32.4% | 1.5384      | 2.0017  | 2.0372 | 1.8%   | 2.0473      |
| $X_2$                                                                                                                                                | 3.0208 | 1.6351 | -45.9% | 2.6386      | 3.0511 | 1.3393 | -56.1% | 2.2539      | 3.0739 | 0.9737 | -68.3% | 1.6140      | 3.0005  | 1.5711 | -47.6% | 2.5398      |
| $X_3$                                                                                                                                                | 0.4998 | 0.5053 | 1.1%   | 0.4970      | 0.4614 | 0.4038 | -12.5% | 0.4452      | 0.5524 | 0.3515 | -36.4% | 0.3902      | 0.4991  | 0.5158 | 3.4%   | 0.5327      |
| Scenario (1): $X_2 \sim \text{Bernoulli}(0.3)$ , $M_{00} = 0.8$ , and $M_{11} = 0.8$ , $X_1 \sim \text{Uniform}(-2, 2)$ , $X_3 \sim N(0, 2^2)$       |        |        |        |             |        |        |        |             |        |        |        |             |         |        |        |             |
| $C$                                                                                                                                                  | 0.9970 | 1.2873 | 29.1%  | 0.9981      | 1.0360 | 1.1418 | 10.2%  | 1.0026      | 0.9952 | 2.0844 | 109.4% | 1.5383      | 1.0125  | 1.8263 | 80.4%  | 1.6593      |
| $X_1$                                                                                                                                                | 1.9921 | 2.0052 | 0.7%   | 2.0187      | 2.0013 | 1.7310 | -13.5% | 1.8221      | 2.0208 | 2.0909 | 3.5%   | 2.0517      | 2.0099  | 2.0469 | 1.8%   | 2.0503      |
| $X_2$                                                                                                                                                | 2.9917 | 1.5762 | -47.3% | 2.5116      | 2.8248 | 1.1534 | -59.2% | 1.9148      | 3.0054 | 1.5037 | -50.0% | 2.4111      | 2.9894  | 0.2343 | -92.2% | 0.6254      |
| $X_3$                                                                                                                                                | 0.4976 | 0.4912 | -1.3%  | 0.4892      | 0.4583 | 0.3931 | -14.2% | 0.4196      | 0.5002 | 0.5267 | 5.3%   | 0.5110      | 0.4747  | 0.5222 | 10.0%  | 0.5227      |

11)  $X_2$  follows *Bernoulli*(0.3) and has misclassification with  $M_{00} = 0.6$ , and  $M_{11} = 0.5$ ;  $X_1$  follows uniform distribution with values in  $[-0.5, 0.5]$ ,  $[-1, 1]$ , or  $[-2, 2]$ ;  $X_3$  follows normal distribution with standard deviation 0.5, 1, or 2.

|                                                                                                                                                      | OLS    |        |        |             | Logit  |        |        |             | Probit |        |        |             | Poisson |        |        |             |
|------------------------------------------------------------------------------------------------------------------------------------------------------|--------|--------|--------|-------------|--------|--------|--------|-------------|--------|--------|--------|-------------|---------|--------|--------|-------------|
|                                                                                                                                                      | $b$    | $b'$   | %      | $b_{simex}$ | $b$    | $b'$   | %      | $b_{simex}$ | $b$    | $b'$   | %      | $b_{simex}$ | $b$     | $b'$   | %      | $b_{simex}$ |
| Scenario (2): $X_2 \sim \text{Bernoulli}(0.3)$ , $M_{00} = 0.6$ , and $M_{11} = 0.5$ , $X_1 \sim \text{Uniform}(-0.5, 0.5)$ , $X_3 \sim N(0, 0.5^2)$ |        |        |        |             |        |        |        |             |        |        |        |             |         |        |        |             |
| $C$                                                                                                                                                  | 1.0125 | 1.8263 | 80.4%  | 1.6593      | 0.9646 | 1.3856 | 43.7%  | 1.3285      | 0.9983 | 1.1932 | 19.5%  | 1.1283      | 1.0054  | 2.7793 | 176.4% | 2.5243      |
| $X_1$                                                                                                                                                | 2.0099 | 2.0469 | 1.8%   | 2.0503      | 2.0123 | 1.8349 | -8.8%  | 1.8363      | 2.0310 | 1.6848 | -17.0% | 1.6814      | 2.0037  | 1.9772 | -1.3%  | 1.9773      |
| $X_2$                                                                                                                                                | 2.9894 | 0.2343 | -92.2% | 0.6254      | 3.3398 | 0.0812 | -97.6% | 0.2178      | 2.6521 | 0.1031 | -96.2% | 0.2643      | 2.9960  | 0.3254 | -89.1% | 0.8658      |
| $X_3$                                                                                                                                                | 0.4747 | 0.5222 | 10.0%  | 0.5227      | 0.3651 | 0.3172 | -13.1% | 0.3164      | 0.5134 | 0.4111 | -19.9% | 0.4184      | 0.4983  | 0.4230 | -15.1% | 0.4210      |
| Scenario (2): $X_2 \sim \text{Bernoulli}(0.3)$ , $M_{00} = 0.6$ , and $M_{11} = 0.5$ , $X_1 \sim \text{Uniform}(-0.5, 0.5)$ , $X_3 \sim N(0, 1^2)$   |        |        |        |             |        |        |        |             |        |        |        |             |         |        |        |             |
| $C$                                                                                                                                                  | 1.0044 | 1.7862 | 77.8%  | 1.6006      | 0.9924 | 1.3477 | 35.8%  | 1.1926      | 0.9695 | 1.1776 | 21.5%  | 1.1232      | 1.0030  | 2.7918 | 178.3% | 2.6383      |
| $X_1$                                                                                                                                                | 2.0024 | 1.9959 | -0.3%  | 2.0165      | 2.1788 | 1.9033 | -12.6% | 1.9386      | 1.9600 | 1.6529 | -15.7% | 1.6553      | 2.0030  | 1.8825 | -6.0%  | 1.9048      |
| $X_2$                                                                                                                                                | 2.9883 | 0.2457 | -91.8% | 0.6806      | 3.4681 | 0.2202 | -93.7% | 0.5819      | 3.0920 | 0.0804 | -97.4% | 0.2077      | 2.9962  | 0.2124 | -92.9% | 0.5393      |
| $X_3$                                                                                                                                                | 0.4991 | 0.4943 | -0.9%  | 0.4985      | 0.5201 | 0.4686 | -9.9%  | 0.4689      | 0.4692 | 0.3756 | -19.9% | 0.3760      | 0.4981  | 0.4609 | -7.5%  | 0.4635      |
| Scenario (2): $X_2 \sim \text{Bernoulli}(0.3)$ , $M_{00} = 0.6$ , and $M_{11} = 0.5$ , $X_1 \sim \text{Uniform}(-0.5, 0.5)$ , $X_3 \sim N(0, 2^2)$   |        |        |        |             |        |        |        |             |        |        |        |             |         |        |        |             |
| $C$                                                                                                                                                  | 1.0029 | 1.7981 | 79.3%  | 1.6060      | 0.9958 | 1.4235 | 42.9%  | 1.3439      | 0.9631 | 1.1382 | 18.2%  | 1.0456      | 1.0015  | 2.7665 | 176.2% | 2.5977      |
| $X_1$                                                                                                                                                | 2.0095 | 2.0638 | 2.7%   | 2.0749      | 1.8149 | 1.5196 | -16.3% | 1.5186      | 1.7935 | 1.4429 | -19.5% | 1.4535      | 1.9964  | 1.9025 | -4.7%  | 1.9019      |
| $X_2$                                                                                                                                                | 3.0155 | 0.2748 | -90.9% | 0.7265      | 3.1526 | 0.1075 | -96.6% | 0.2887      | 3.0195 | 0.1431 | -95.3% | 0.3755      | 3.0034  | 0.2145 | -92.9% | 0.5918      |
| $X_3$                                                                                                                                                | 0.5096 | 0.5092 | -0.1%  | 0.5120      | 0.4772 | 0.4117 | -13.7% | 0.4130      | 0.4693 | 0.3637 | -22.5% | 0.3636      | 0.4987  | 0.5033 | 0.9%   | 0.5048      |
| Scenario (2): $X_2 \sim \text{Bernoulli}(0.3)$ , $M_{00} = 0.6$ , and $M_{11} = 0.5$ , $X_1 \sim \text{Uniform}(-1, 1)$ , $X_3 \sim N(0, 0.5^2)$     |        |        |        |             |        |        |        |             |        |        |        |             |         |        |        |             |
| $C$                                                                                                                                                  | 0.9978 | 1.8340 | 83.8%  | 1.7047      | 0.9916 | 1.3813 | 39.3%  | 1.2718      | 1.0697 | 1.2432 | 16.2%  | 1.1438      | 0.9885  | 2.7831 | 181.6% | 2.5642      |
| $X_1$                                                                                                                                                | 1.9966 | 2.0243 | 1.4%   | 2.0173      | 2.0531 | 1.7922 | -12.7% | 1.7944      | 2.1276 | 1.7174 | -19.3% | 1.7225      | 2.0082  | 1.9565 | -2.6%  | 1.9553      |
| $X_2$                                                                                                                                                | 3.0247 | 0.1703 | -94.4% | 0.4703      | 3.2656 | 0.1641 | -95.0% | 0.4376      | 3.0026 | 0.1402 | -95.3% | 0.3895      | 3.0103  | 0.2782 | -90.8% | 0.7359      |
| $X_3$                                                                                                                                                | 0.4795 | 0.4439 | -7.4%  | 0.4417      | 0.3949 | 0.3909 | -1.0%  | 0.3859      | 0.3843 | 0.2899 | -24.6% | 0.2871      | 0.5042  | 0.4976 | -1.3%  | 0.4906      |
| Scenario (2): $X_2 \sim \text{Bernoulli}(0.3)$ , $M_{00} = 0.6$ , and $M_{11} = 0.5$ , $X_1 \sim \text{Uniform}(-1, 1)$ , $X_3 \sim N(0, 1^2)$       |        |        |        |             |        |        |        |             |        |        |        |             |         |        |        |             |
| $C$                                                                                                                                                  | 0.9938 | 1.7939 | 80.5%  | 1.6124      | 0.9785 | 1.3821 | 41.2%  | 1.2544      | 0.9869 | 1.2161 | 23.2%  | 1.1898      | 1.0038  | 2.7980 | 178.7% | 2.6058      |
| $X_1$                                                                                                                                                | 2.0006 | 2.0184 | 0.9%   | 2.0237      | 1.9929 | 1.6768 | -15.9% | 1.6744      | 1.9695 | 1.5740 | -20.1% | 1.5720      | 2.0039  | 1.9787 | -1.3%  | 1.9842      |
| $X_2$                                                                                                                                                | 3.0150 | 0.2572 | -91.5% | 0.6821      | 3.0512 | 0.2026 | -93.4% | 0.5120      | 2.9746 | 0.0200 | -99.3% | 0.0768      | 2.9989  | 0.2449 | -91.8% | 0.6692      |
| $X_3$                                                                                                                                                | 0.4891 | 0.4791 | -2.0%  | 0.4803      | 0.5796 | 0.4882 | -15.8% | 0.4880      | 0.4663 | 0.3328 | -28.6% | 0.3325      | 0.4983  | 0.4881 | -2.0%  | 0.4809      |
| Scenario (2): $X_2 \sim \text{Bernoulli}(0.3)$ , $M_{00} = 0.6$ , and $M_{11} = 0.5$ , $X_1 \sim \text{Uniform}(-1, 1)$ , $X_3 \sim N(0, 2^2)$       |        |        |        |             |        |        |        |             |        |        |        |             |         |        |        |             |
| $C$                                                                                                                                                  | 1.0221 | 1.8403 | 80.0%  | 1.6669      | 0.9539 | 1.3933 | 46.1%  | 1.3219      | 1.0001 | 1.1407 | 14.1%  | 1.0441      | 1.0082  | 2.7666 | 174.4% | 2.5770      |
| $X_1$                                                                                                                                                | 2.0042 | 2.0121 | 0.4%   | 1.9987      | 1.9427 | 1.6184 | -16.7% | 1.6162      | 1.9271 | 1.4299 | -25.8% | 1.4233      | 2.0023  | 2.0737 | 3.6%   | 2.1009      |
| $X_2$                                                                                                                                                | 2.9765 | 0.2327 | -92.2% | 0.6312      | 2.8525 | 0.0923 | -96.8% | 0.2575      | 2.8328 | 0.1345 | -95.3% | 0.3681      | 2.9953  | 0.2237 | -92.5% | 0.5993      |
| $X_3$                                                                                                                                                | 0.4978 | 0.4991 | 0.3%   | 0.5000      | 0.4838 | 0.3843 | -20.6% | 0.3843      | 0.5105 | 0.3594 | -29.6% | 0.3598      | 0.4992  | 0.5270 | 5.6%   | 0.5333      |
| Scenario (2): $X_2 \sim \text{Bernoulli}(0.3)$ , $M_{00} = 0.6$ , and $M_{11} = 0.5$ , $X_1 \sim \text{Uniform}(-2, 2)$ , $X_3 \sim N(0, 0.5^2)$     |        |        |        |             |        |        |        |             |        |        |        |             |         |        |        |             |
| $C$                                                                                                                                                  | 1.0013 | 1.7734 | 77.1%  | 1.5563      | 0.9014 | 1.3692 | 51.9%  | 1.3194      | 1.0985 | 1.1781 | 7.3%   | 1.0970      | 0.9941  | 2.6033 | 161.9% | 2.3056      |
| $X_1$                                                                                                                                                | 1.9929 | 1.9901 | -0.1%  | 1.9849      | 2.0179 | 1.6547 | -18.0% | 1.6538      | 2.1326 | 1.3109 | -38.5% | 1.3159      | 2.0019  | 2.0665 | 3.2%   | 2.0732      |
| $X_2$                                                                                                                                                | 2.9872 | 0.3128 | -89.5% | 0.8244      | 2.9869 | 0.0708 | -97.6% | 0.1818      | 3.0534 | 0.1129 | -96.3% | 0.3102      | 3.0032  | 0.3547 | -88.2% | 0.9642      |
| $X_3$                                                                                                                                                | 0.5004 | 0.4873 | -2.6%  | 0.4950      | 0.5227 | 0.4542 | -13.1% | 0.4503      | 0.6389 | 0.3440 | -46.2% | 0.3403      | 0.5005  | 0.6250 | 24.9%  | 0.6945      |
| Scenario (2): $X_2 \sim \text{Bernoulli}(0.3)$ , $M_{00} = 0.6$ , and $M_{11} = 0.5$ , $X_1 \sim \text{Uniform}(-2, 2)$ , $X_3 \sim N(0, 1^2)$       |        |        |        |             |        |        |        |             |        |        |        |             |         |        |        |             |
| $C$                                                                                                                                                  | 0.9999 | 1.8238 | 82.4%  | 1.6320      | 1.1048 | 1.4272 | 29.2%  | 1.2062      | 0.9453 | 1.0586 | 12.0%  | 0.9251      | 0.9949  | 2.8569 | 187.1% | 2.7721      |
| $X_1$                                                                                                                                                | 1.9969 | 2.0096 | 0.6%   | 2.0105      | 1.9938 | 1.6619 | -16.6% | 1.6838      | 1.9629 | 1.2584 | -35.9% | 1.2668      | 1.9977  | 2.0097 | 0.6%   | 2.0166      |
| $X_2$                                                                                                                                                | 2.9974 | 0.2598 | -91.3% | 0.6990      | 2.7599 | 0.3501 | -87.3% | 0.9172      | 2.8531 | 0.2037 | -92.9% | 0.5345      | 3.0095  | 0.1016 | -96.6% | 0.2782      |
| $X_3$                                                                                                                                                | 0.5049 | 0.5093 | 0.9%   | 0.5126      | 0.5028 | 0.3939 | -21.7% | 0.3961      | 0.5109 | 0.3158 | -38.2% | 0.322       | 0.4993  | 0.5140 | 2.9%   | 0.5153      |
| Scenario (2): $X_2 \sim \text{Bernoulli}(0.3)$ , $M_{00} = 0.6$ , and $M_{11} = 0.5$ , $X_1 \sim \text{Uniform}(-2, 2)$ , $X_3 \sim N(0, 2^2)$       |        |        |        |             |        |        |        |             |        |        |        |             |         |        |        |             |
| $C$                                                                                                                                                  | 0.9987 | 1.8218 | 82.4%  | 1.6446      | 1.0588 | 1.4869 | 40.4%  | 1.3916      | 1.0539 | 1.1748 | 11.5%  | 1.1105      | 0.9988  | 2.8323 | 183.6% | 2.5891      |
| $X_1$                                                                                                                                                | 1.9868 | 1.9961 | 0.5%   | 1.9963      | 1.9604 | 1.6201 | -17.4% | 1.6215      | 2.0675 | 1.2863 | -37.8% | 1.2881      | 2.0022  | 1.9017 | -5.0%  | 1.9032      |
| $X_2$                                                                                                                                                | 2.9840 | 0.2445 | -91.8% | 0.6516      | 2.9011 | 0.1423 | -95.1% | 0.3663      | 3.0427 | 0.0907 | -97.0% | 0.2412      | 2.9980  | 0.3226 | -89.2% | 0.8505      |
| $X_3$                                                                                                                                                | 0.5039 | 0.5005 | -0.7%  | 0.5018      | 0.4983 | 0.4131 | -17.1% | 0.4133      | 0.5155 | 0.3123 | -39.4% | 0.3129      | 0.4996  | 0.5069 | 1.5%   | 0.5002      |

12)  $X_2$  follows *Bernoulli*(0.5) and has misclassification with  $M_{00} = 0.6$ , and  $M_{11} = 0.5$ ;  $X_1$  follows uniform distribution with values in  $[-0.5, 0.5]$ ,  $[-1, 1]$ , or  $[-2, 2]$ ;  $X_3$  follows normal distribution with standard deviation 0.5, 1, or 2.

|                                                                                                                                                      | OLS    |        |        |             | Logit  |        |        |             | Probit |        |        |             | Poisson |        |        |             |
|------------------------------------------------------------------------------------------------------------------------------------------------------|--------|--------|--------|-------------|--------|--------|--------|-------------|--------|--------|--------|-------------|---------|--------|--------|-------------|
|                                                                                                                                                      | $b$    | $b'$   | %      | $b_{simex}$ | $b$    | $b'$   | %      | $b_{simex}$ | $b$    | $b'$   | %      | $b_{simex}$ | $b$     | $b'$   | %      | $b_{simex}$ |
| Scenario (3): $X_2 \sim \text{Bernoulli}(0.5)$ , $M_{00} = 0.6$ , and $M_{11} = 0.5$ , $X_1 \sim \text{Uniform}(-0.5, 0.5)$ , $X_3 \sim N(0, 0.5^2)$ |        |        |        |             |        |        |        |             |        |        |        |             |         |        |        |             |
| $C$                                                                                                                                                  | 0.9972 | 2.3886 | 139.5% | 2.1839      | 1.1002 | 1.7270 | 57.0%  | 1.4998      | 1.0160 | 1.3668 | 34.5%  | 1.2310      | 0.9875  | 3.2475 | 228.9% | 3.0943      |
| $X_1$                                                                                                                                                | 1.9687 | 1.9616 | -0.4%  | 1.9692      | 2.0628 | 1.8030 | -12.6% | 1.8099      | 1.9939 | 1.5908 | -20.2% | 1.5964      | 2.0130  | 2.0151 | 0.1%   | 2.0073      |
| $X_2$                                                                                                                                                | 3.0053 | 0.2706 | -91.0% | 0.7291      | 2.8968 | 0.3410 | -88.2% | 0.8921      | 2.8002 | 0.1826 | -93.6% | 0.4942      | 3.0086  | 0.1983 | -93.4% | 0.5187      |
| $X_3$                                                                                                                                                | 0.5074 | 0.4771 | -6.0%  | 0.4636      | 0.5174 | 0.4592 | -11.3% | 0.4750      | 0.5481 | 0.4015 | -26.7% | 0.4029      | 0.4982  | 0.4723 | -5.2%  | 0.4770      |
| Scenario (3): $X_2 \sim \text{Bernoulli}(0.5)$ , $M_{00} = 0.6$ , and $M_{11} = 0.5$ , $X_1 \sim \text{Uniform}(-0.5, 0.5)$ , $X_3 \sim N(0, 1^2)$   |        |        |        |             |        |        |        |             |        |        |        |             |         |        |        |             |
| $C$                                                                                                                                                  | 0.9977 | 2.3802 | 138.6% | 2.1996      | 0.9453 | 1.6479 | 74.3%  | 1.4783      | 1.0077 | 1.3693 | 35.9%  | 1.2773      | 0.9870  | 3.2747 | 231.8% | 3.1521      |
| $X_1$                                                                                                                                                | 2.0044 | 1.9256 | -3.9%  | 1.9292      | 2.2463 | 1.9079 | -15.1% | 1.9085      | 2.2120 | 1.6429 | -25.7% | 1.6467      | 2.0140  | 1.9932 | -1.0%  | 2.0072      |
| $X_2$                                                                                                                                                | 2.9749 | 0.2416 | -91.9% | 0.6434      | 2.8196 | 0.2372 | -91.6% | 0.6232      | 2.9192 | 0.1268 | -95.7% | 0.3349      | 3.0123  | 0.1505 | -95.0% | 0.4059      |
| $X_3$                                                                                                                                                | 0.5055 | 0.5308 | 5.0%   | 0.5335      | 0.5193 | 0.4304 | -17.1% | 0.4342      | 0.4572 | 0.3421 | -25.2% | 0.3432      | 0.4989  | 0.5178 | 3.8%   | 0.5237      |
| Scenario (3): $X_2 \sim \text{Bernoulli}(0.5)$ , $M_{00} = 0.6$ , and $M_{11} = 0.5$ , $X_1 \sim \text{Uniform}(-0.5, 0.5)$ , $X_3 \sim N(0, 2^2)$   |        |        |        |             |        |        |        |             |        |        |        |             |         |        |        |             |
| $C$                                                                                                                                                  | 1.0135 | 2.3854 | 135.4% | 2.1375      | 1.0112 | 1.6717 | 65.3%  | 1.4011      | 1.0390 | 1.4077 | 35.5%  | 1.3296      | 0.9927  | 3.3289 | 235.3% | 3.2254      |
| $X_1$                                                                                                                                                | 1.9941 | 2.0845 | 4.5%   | 2.0805      | 2.0193 | 1.5249 | -24.5% | 1.4933      | 2.0417 | 1.3436 | -34.2% | 1.3425      | 1.9918  | 1.9733 | -0.9%  | 1.9825      |
| $X_2$                                                                                                                                                | 3.0048 | 0.3288 | -89.1% | 0.8733      | 2.8911 | 0.3819 | -86.8% | 1.0183      | 3.1598 | 0.0976 | -96.9% | 0.2756      | 3.0066  | 0.1321 | -95.6% | 0.3518      |
| $X_3$                                                                                                                                                | 0.4960 | 0.5103 | 2.9%   | 0.5118      | 0.4543 | 0.3739 | -17.7% | 0.3756      | 0.5196 | 0.3541 | -31.9% | 0.3543      | 0.5016  | 0.4840 | -3.5%  | 0.4846      |
| Scenario (3): $X_2 \sim \text{Bernoulli}(0.5)$ , $M_{00} = 0.6$ , and $M_{11} = 0.5$ , $X_1 \sim \text{Uniform}(-1, 1)$ , $X_3 \sim N(0, 0.5^2)$     |        |        |        |             |        |        |        |             |        |        |        |             |         |        |        |             |
| $C$                                                                                                                                                  | 0.9910 | 2.3384 | 136.0% | 2.0920      | 1.0690 | 1.7733 | 65.9%  | 1.5816      | 0.9785 | 1.3737 | 40.4%  | 1.3039      | 0.9850  | 3.2450 | 229.4% | 3.1158      |
| $X_1$                                                                                                                                                | 1.9883 | 2.0224 | 1.7%   | 2.0204      | 1.9698 | 1.6879 | -14.3% | 1.7111      | 2.0610 | 1.4257 | -30.8% | 1.4297      | 1.9992  | 2.0137 | 0.7%   | 2.0105      |
| $X_2$                                                                                                                                                | 3.0202 | 0.3327 | -89.0% | 0.8884      | 2.8373 | 0.2842 | -90.0% | 0.7342      | 3.2651 | 0.0966 | -97.0% | 0.2505      | 3.0151  | 0.1633 | -94.6% | 0.4385      |
| $X_3$                                                                                                                                                | 0.5065 | 0.5292 | 4.5%   | 0.5251      | 0.4822 | 0.4610 | -4.4%  | 0.4592      | 0.5919 | 0.3823 | -35.4% | 0.3870      | 0.5026  | 0.4520 | -10.1% | 0.4543      |
| Scenario (3): $X_2 \sim \text{Bernoulli}(0.5)$ , $M_{00} = 0.6$ , and $M_{11} = 0.5$ , $X_1 \sim \text{Uniform}(-1, 1)$ , $X_3 \sim N(0, 1^2)$       |        |        |        |             |        |        |        |             |        |        |        |             |         |        |        |             |
| $C$                                                                                                                                                  | 0.9948 | 2.3663 | 137.9% | 2.1139      | 1.0522 | 1.8556 | 76.4%  | 1.7644      | 1.0291 | 1.4127 | 37.3%  | 1.3480      | 0.9942  | 3.2839 | 230.3% | 3.1828      |
| $X_1$                                                                                                                                                | 2.0158 | 2.1134 | 4.8%   | 2.1238      | 2.1883 | 1.7466 | -20.2% | 1.7472      | 1.9786 | 1.3321 | -32.7% | 1.3350      | 2.0085  | 2.0139 | 0.3%   | 2.0111      |
| $X_2$                                                                                                                                                | 2.9958 | 0.3217 | -89.3% | 0.8653      | 3.0131 | 0.1152 | -96.2% | 0.3173      | 3.1806 | 0.1016 | -96.8% | 0.2561      | 3.0061  | 0.1307 | -95.7% | 0.3437      |
| $X_3$                                                                                                                                                | 0.4916 | 0.5131 | 4.4%   | 0.5183      | 0.4579 | 0.3329 | -27.3% | 0.3333      | 0.4466 | 0.2887 | -35.3% | 0.2896      | 0.4976  | 0.4933 | -0.9%  | 0.4968      |
| Scenario (3): $X_2 \sim \text{Bernoulli}(0.5)$ , $M_{00} = 0.6$ , and $M_{11} = 0.5$ , $X_1 \sim \text{Uniform}(-1, 1)$ , $X_3 \sim N(0, 2^2)$       |        |        |        |             |        |        |        |             |        |        |        |             |         |        |        |             |
| $C$                                                                                                                                                  | 0.9776 | 2.3244 | 137.8% | 2.1101      | 1.0127 | 1.6846 | 66.3%  | 1.5013      | 1.1042 | 1.4211 | 28.7%  | 1.3070      | 0.9990  | 3.3099 | 231.3% | 3.1853      |
| $X_1$                                                                                                                                                | 1.9995 | 2.0738 | 3.7%   | 2.0710      | 1.9404 | 1.5685 | -19.2% | 1.5783      | 2.0572 | 1.3668 | -33.6% | 1.3570      | 2.0023  | 1.9590 | -2.2%  | 1.9517      |
| $X_2$                                                                                                                                                | 3.0135 | 0.2885 | -90.4% | 0.7727      | 2.7258 | 0.2789 | -89.8% | 0.7176      | 2.8857 | 0.1632 | -94.3% | 0.4304      | 2.9959  | 0.1774 | -94.1% | 0.4620      |
| $X_3$                                                                                                                                                | 0.5002 | 0.4759 | -4.9%  | 0.4746      | 0.4895 | 0.3883 | -20.7% | 0.3910      | 0.4987 | 0.3124 | -37.4% | 0.3103      | 0.5011  | 0.4907 | -2.1%  | 0.4842      |
| Scenario (3): $X_2 \sim \text{Bernoulli}(0.5)$ , $M_{00} = 0.6$ , and $M_{11} = 0.5$ , $X_1 \sim \text{Uniform}(-2, 2)$ , $X_3 \sim N(0, 0.5^2)$     |        |        |        |             |        |        |        |             |        |        |        |             |         |        |        |             |
| $C$                                                                                                                                                  | 1.0126 | 2.3608 | 133.1% | 2.0975      | 0.9680 | 1.7633 | 82.2%  | 1.6276      | 1.0081 | 1.2811 | 27.1%  | 1.1494      | 1.0009  | 3.2203 | 221.7% | 2.9421      |
| $X_1$                                                                                                                                                | 1.9963 | 2.0235 | 1.4%   | 2.0250      | 1.9185 | 1.4841 | -22.6% | 1.4885      | 2.0660 | 1.0818 | -47.6% | 1.0910      | 1.9993  | 1.9796 | -1.0%  | 2.0046      |
| $X_2$                                                                                                                                                | 2.9745 | 0.3548 | -88.1% | 0.9485      | 2.9176 | 0.2066 | -92.9% | 0.5364      | 3.1537 | 0.1850 | -94.1% | 0.4970      | 3.0006  | 0.2877 | -90.4% | 0.7787      |
| $X_3$                                                                                                                                                | 0.5090 | 0.4498 | -11.6% | 0.4547      | 0.4523 | 0.2789 | -38.3% | 0.2910      | 0.5362 | 0.2949 | -45.0% | 0.3039      | 0.4979  | 0.4875 | -2.1%  | 0.5148      |
| Scenario (3): $X_2 \sim \text{Bernoulli}(0.5)$ , $M_{00} = 0.6$ , and $M_{11} = 0.5$ , $X_1 \sim \text{Uniform}(-2, 2)$ , $X_3 \sim N(0, 1^2)$       |        |        |        |             |        |        |        |             |        |        |        |             |         |        |        |             |
| $C$                                                                                                                                                  | 1.0030 | 2.3940 | 138.7% | 2.1804      | 0.9380 | 1.7333 | 84.8%  | 1.6045      | 0.9610 | 1.2843 | 33.6%  | 1.1814      | 1.0035  | 3.2545 | 224.3% | 3.1037      |
| $X_1$                                                                                                                                                | 2.0032 | 2.0386 | 1.8%   | 2.0390      | 1.8910 | 1.4605 | -22.8% | 1.4602      | 1.9965 | 1.0911 | -45.4% | 1.0938      | 1.9993  | 2.0423 | 2.2%   | 2.0413      |
| $X_2$                                                                                                                                                | 2.9875 | 0.3017 | -89.9% | 0.7969      | 2.8140 | 0.1724 | -93.9% | 0.4750      | 2.9937 | 0.1404 | -95.3% | 0.3853      | 2.9988  | 0.1818 | -93.9% | 0.4968      |
| $X_3$                                                                                                                                                | 0.4999 | 0.4884 | -2.3%  | 0.4927      | 0.4823 | 0.3297 | -31.6% | 0.3319      | 0.4273 | 0.2217 | -48.1% | 0.2241      | 0.5013  | 0.4768 | -4.9%  | 0.4811      |
| Scenario (3): $X_2 \sim \text{Bernoulli}(0.5)$ , $M_{00} = 0.6$ , and $M_{11} = 0.5$ , $X_1 \sim \text{Uniform}(-2, 2)$ , $X_3 \sim N(0, 2^2)$       |        |        |        |             |        |        |        |             |        |        |        |             |         |        |        |             |
| $C$                                                                                                                                                  | 0.9930 | 2.3657 | 138.2% | 2.1953      | 1.0671 | 1.8077 | 69.4%  | 1.6273      | 1.0492 | 1.3426 | 28.0%  | 1.2326      | 1.0051  | 3.2496 | 223.3% | 3.0455      |
| $X_1$                                                                                                                                                | 1.9922 | 1.9770 | -0.8%  | 1.9762      | 1.9767 | 1.5116 | -23.5% | 1.5236      | 2.0340 | 1.1422 | -43.8% | 1.1421      | 1.9963  | 1.9590 | -1.9%  | 1.9680      |
| $X_2$                                                                                                                                                | 3.0031 | 0.2166 | -92.8% | 0.5791      | 2.8788 | 0.2642 | -90.8% | 0.6958      | 3.0356 | 0.1518 | -95.0% | 0.3997      | 2.9993  | 0.2311 | -92.3% | 0.6270      |
| $X_3$                                                                                                                                                | 0.4976 | 0.5098 | 2.5%   | 0.5094      | 0.4999 | 0.3849 | -23.0% | 0.3820      | 0.5118 | 0.2572 | -49.7% | 0.2566      | 0.5005  | 0.5318 | 6.2%   | 0.5338      |

13)  $X_2$  follows *Bernoulli*(0.3) and has misclassification with  $M_{00} = 0.8$ , and  $M_{11} = 0.8$ ;  $X_1$  follows uniform distribution with values in  $[-0.5, 0.5]$ ,  $[-1, 1]$ , or  $[-2, 2]$ ;  $X_3$  follows *Bernoulli* distribution with  $Pr(X_3 = 1)$  equals 0.3, 0.5, or 0.7.

|                                                                                                                                                                | OLS    |        |        |             | Logit  |        |        |             | Probit |        |        |             | Poisson |        |        |             |
|----------------------------------------------------------------------------------------------------------------------------------------------------------------|--------|--------|--------|-------------|--------|--------|--------|-------------|--------|--------|--------|-------------|---------|--------|--------|-------------|
|                                                                                                                                                                | $b$    | $b'$   | %      | $b_{simex}$ | $b$    | $b'$   | %      | $b_{simex}$ | $b$    | $b'$   | %      | $b_{simex}$ | $b$     | $b'$   | %      | $b_{simex}$ |
| Scenario (1): $X_2 \sim \text{Bernoulli}(0.3)$ , $M_{00} = 0.8$ , and $M_{11} = 0.8$ , $X_1 \sim \text{Uniform}(-0.5, 0.5)$ , $X_3 \sim \text{Bernoulli}(0.3)$ |        |        |        |             |        |        |        |             |        |        |        |             |         |        |        |             |
| $C$                                                                                                                                                            | 1.0112 | 1.3022 | 28.8%  | 1.0186      | 1.0505 | 1.2005 | 14.3%  | 1.0820      | 1.0038 | 1.0573 | 5.3%   | 0.9781      | 1.0018  | 1.9680 | 96.4%  | 1.3474      |
| $X_1$                                                                                                                                                          | 1.9784 | 1.9887 | 0.5%   | 1.9633      | 2.0898 | 1.9370 | -7.3%  | 1.9999      | 1.9273 | 1.7556 | -8.9%  | 1.7985      | 2.0064  | 2.0325 | 1.3%   | 2.0939      |
| $X_2$                                                                                                                                                          | 2.9675 | 1.5715 | -47.0% | 2.5276      | 3.1692 | 0.9483 | -70.1% | 1.6091      | 3.3488 | 0.5845 | -82.7% | 0.9730      | 2.9994  | 1.5973 | -46.7% | 2.5762      |
| $X_3$                                                                                                                                                          | 0.5086 | 0.4921 | -3.3%  | 0.5473      | 0.3871 | 0.3575 | -7.6%  | 0.3721      | 0.4930 | 0.4525 | -8.2%  | 0.4977      | 0.5096  | 0.5209 | 2.2%   | 0.5217      |
| Scenario (1): $X_2 \sim \text{Bernoulli}(0.3)$ , $M_{00} = 0.8$ , and $M_{11} = 0.8$ , $X_1 \sim \text{Uniform}(-0.5, 0.5)$ , $X_3 \sim \text{Bernoulli}(0.7)$ |        |        |        |             |        |        |        |             |        |        |        |             |         |        |        |             |
| $C$                                                                                                                                                            | 1.0015 | 1.2974 | 29.5%  | 0.9870      | 1.0713 | 1.2247 | 14.3%  | 1.1181      | 1.1028 | 1.1638 | 5.5%   | 1.1003      | 1.0242  | 2.1525 | 110.2% | 1.6454      |
| $X_1$                                                                                                                                                          | 1.9805 | 1.9837 | 0.2%   | 2.0060      | 2.0616 | 1.9849 | -3.7%  | 2.0404      | 2.0604 | 1.9143 | -7.1%  | 1.9847      | 2.0020  | 2.0790 | 3.8%   | 2.0875      |
| $X_2$                                                                                                                                                          | 2.9823 | 1.6490 | -44.7% | 2.6417      | 2.8867 | 0.8564 | -70.3% | 1.4272      | 2.3496 | 0.5936 | -74.7% | 1.0126      | 2.9838  | 1.4508 | -51.4% | 2.3364      |
| $X_3$                                                                                                                                                          | 0.5090 | 0.4979 | -2.2%  | 0.5287      | 0.2900 | 0.2793 | -3.7%  | 0.2874      | 0.4039 | 0.3565 | -11.7% | 0.3575      | 0.4892  | 0.4623 | -5.5%  | 0.4269      |
| Scenario (1): $X_2 \sim \text{Bernoulli}(0.3)$ , $M_{00} = 0.8$ , and $M_{11} = 0.8$ , $X_1 \sim \text{Uniform}(-0.5, 0.5)$ , $X_3 \sim \text{Bernoulli}(0.5)$ |        |        |        |             |        |        |        |             |        |        |        |             |         |        |        |             |
| $C$                                                                                                                                                            | 0.9833 | 1.2417 | 26.3%  | 0.9567      | 1.0397 | 1.1752 | 13.0%  | 1.0525      | 0.9622 | 1.0275 | 6.8%   | 0.9684      | 0.9972  | 1.9434 | 94.9%  | 1.3052      |
| $X_1$                                                                                                                                                          | 1.9746 | 1.9728 | -0.1%  | 1.9171      | 2.2523 | 2.1126 | -6.2%  | 2.1788      | 2.1823 | 1.9986 | -8.4%  | 2.0730      | 1.9992  | 1.8973 | -5.1%  | 1.9274      |
| $X_2$                                                                                                                                                          | 3.0093 | 1.6393 | -45.5% | 2.6494      | 2.8038 | 1.0026 | -64.2% | 1.6972      | 3.4301 | 0.5913 | -82.8% | 0.9722      | 3.0034  | 1.6243 | -45.9% | 2.6500      |
| $X_3$                                                                                                                                                          | 0.5036 | 0.5396 | 7.1%   | 0.5479      | 0.5943 | 0.5568 | -6.3%  | 0.5787      | 0.5952 | 0.5421 | -8.9%  | 0.5632      | 0.4964  | 0.5727 | 15.4%  | 0.4972      |
| Scenario (1): $X_2 \sim \text{Bernoulli}(0.3)$ , $M_{00} = 0.8$ , and $M_{11} = 0.8$ , $X_1 \sim \text{Uniform}(-1, 1)$ , $X_3 \sim \text{Bernoulli}(0.3)$     |        |        |        |             |        |        |        |             |        |        |        |             |         |        |        |             |
| $C$                                                                                                                                                            | 1.0075 | 1.3108 | 30.1%  | 1.0555      | 1.0388 | 1.1646 | 12.1%  | 1.0312      | 0.9802 | 1.0204 | 4.1%   | 0.9393      | 0.9951  | 1.9868 | 99.7%  | 1.3563      |
| $X_1$                                                                                                                                                          | 1.9953 | 2.0574 | 3.1%   | 2.0439      | 1.9544 | 1.7835 | -8.7%  | 1.8533      | 1.9248 | 1.6310 | -15.3% | 1.6986      | 2.0021  | 1.9753 | -1.3%  | 2.0503      |
| $X_2$                                                                                                                                                          | 3.0031 | 1.5472 | -48.5% | 2.4703      | 2.7499 | 1.0199 | -62.9% | 1.7128      | 3.2893 | 0.7111 | -78.4% | 1.2137      | 3.0030  | 1.6239 | -45.9% | 2.6083      |
| $X_3$                                                                                                                                                          | 0.5105 | 0.5110 | 0.1%   | 0.4850      | 0.4770 | 0.4257 | -10.8% | 0.4331      | 0.4869 | 0.4372 | -10.2% | 0.4643      | 0.5001  | 0.4960 | -0.8%  | 0.4575      |
| Scenario (1): $X_2 \sim \text{Bernoulli}(0.3)$ , $M_{00} = 0.8$ , and $M_{11} = 0.8$ , $X_1 \sim \text{Uniform}(-1, 1)$ , $X_3 \sim \text{Bernoulli}(0.7)$     |        |        |        |             |        |        |        |             |        |        |        |             |         |        |        |             |
| $C$                                                                                                                                                            | 1.0223 | 1.3155 | 28.7%  | 1.0406      | 0.9510 | 1.1095 | 16.7%  | 0.9814      | 0.9669 | 1.0260 | 6.1%   | 0.9461      | 0.9966  | 1.9976 | 100.4% | 1.4143      |
| $X_1$                                                                                                                                                          | 1.9832 | 1.9611 | -1.1%  | 1.9745      | 2.0640 | 1.9229 | -6.8%  | 1.9845      | 1.9969 | 1.7774 | -11.0% | 1.8596      | 2.0002  | 1.9643 | -1.8%  | 1.9802      |
| $X_2$                                                                                                                                                          | 2.9736 | 1.6091 | -45.9% | 2.5647      | 2.8068 | 1.0855 | -61.3% | 1.8478      | 2.6273 | 0.6939 | -73.6% | 1.1563      | 2.9983  | 1.5349 | -48.8% | 2.4802      |
| $X_3$                                                                                                                                                          | 0.4907 | 0.4644 | -5.4%  | 0.4753      | 0.5555 | 0.4947 | -10.9% | 0.5043      | 0.5325 | 0.4480 | -15.9% | 0.4681      | 0.5029  | 0.5222 | 3.8%   | 0.5381      |
| Scenario (1): $X_2 \sim \text{Bernoulli}(0.3)$ , $M_{00} = 0.8$ , and $M_{11} = 0.8$ , $X_1 \sim \text{Uniform}(-1, 1)$ , $X_3 \sim \text{Bernoulli}(0.5)$     |        |        |        |             |        |        |        |             |        |        |        |             |         |        |        |             |
| $C$                                                                                                                                                            | 1.0036 | 1.2845 | 28.0%  | 0.9939      | 0.9579 | 1.0847 | 13.2%  | 0.9326      | 0.9161 | 0.9594 | 4.7%   | 0.8806      | 0.9998  | 2.1392 | 114.0% | 1.6266      |
| $X_1$                                                                                                                                                          | 2.0009 | 1.9772 | -1.2%  | 1.9934      | 1.9359 | 1.7793 | -8.1%  | 1.8251      | 1.9282 | 1.6676 | -13.5% | 1.7704      | 2.0052  | 2.0019 | -0.2%  | 1.9678      |
| $X_2$                                                                                                                                                          | 2.9706 | 1.5815 | -46.8% | 2.5368      | 2.8322 | 0.9885 | -65.1% | 1.6615      | 3.0418 | 0.7617 | -75.0% | 1.3039      | 3.0053  | 1.3999 | -53.4% | 2.2274      |
| $X_3$                                                                                                                                                          | 0.5119 | 0.5212 | 1.8%   | 0.5653      | 0.4775 | 0.4413 | -7.6%  | 0.4743      | 0.5726 | 0.4916 | -14.1% | 0.5290      | 0.4950  | 0.4628 | -6.5%  | 0.5054      |
| Scenario (1): $X_2 \sim \text{Bernoulli}(0.3)$ , $M_{00} = 0.8$ , and $M_{11} = 0.8$ , $X_1 \sim \text{Uniform}(-2, 2)$ , $X_3 \sim \text{Bernoulli}(0.3)$     |        |        |        |             |        |        |        |             |        |        |        |             |         |        |        |             |
| $C$                                                                                                                                                            | 1.0031 | 1.3106 | 30.7%  | 1.0240      | 0.9258 | 1.0401 | 12.3%  | 0.9099      | 1.0225 | 0.9119 | -10.8% | 0.8259      | 0.9949  | 2.0556 | 106.6% | 1.4994      |
| $X_1$                                                                                                                                                          | 2.0003 | 1.9835 | -0.8%  | 1.9888      | 1.9659 | 1.6680 | -15.2% | 1.7587      | 1.9779 | 1.4617 | -26.1% | 1.6349      | 1.9988  | 1.9650 | -1.7%  | 1.9895      |
| $X_2$                                                                                                                                                          | 2.9747 | 1.5207 | -48.9% | 2.4432      | 3.1981 | 1.1995 | -62.5% | 1.9922      | 2.9634 | 1.1179 | -62.3% | 1.8992      | 3.0050  | 1.5073 | -49.8% | 2.3841      |
| $X_3$                                                                                                                                                          | 0.5043 | 0.4958 | -1.7%  | 0.5394      | 0.5549 | 0.5300 | -4.5%  | 0.5201      | 0.5320 | 0.3952 | -25.7% | 0.4781      | 0.5000  | 0.5452 | 9.0%   | 0.5746      |
| Scenario (1): $X_2 \sim \text{Bernoulli}(0.3)$ , $M_{00} = 0.8$ , and $M_{11} = 0.8$ , $X_1 \sim \text{Uniform}(-2, 2)$ , $X_3 \sim \text{Bernoulli}(0.7)$     |        |        |        |             |        |        |        |             |        |        |        |             |         |        |        |             |
| $C$                                                                                                                                                            | 0.9848 | 1.2806 | 30.0%  | 0.9846      | 0.9713 | 1.1118 | 14.5%  | 0.9635      | 0.9010 | 0.8547 | -5.1%  | 0.7880      | 0.9921  | 2.0264 | 104.3% | 1.4730      |
| $X_1$                                                                                                                                                          | 1.9937 | 1.9973 | 0.2%   | 1.9877      | 1.9310 | 1.6930 | -12.3% | 1.7859      | 2.0198 | 1.4099 | -30.2% | 1.5377      | 2.0027  | 2.0189 | 0.8%   | 2.0227      |
| $X_2$                                                                                                                                                          | 3.0184 | 1.6531 | -45.2% | 2.6394      | 3.0993 | 1.3196 | -57.4% | 2.2435      | 3.1158 | 0.9415 | -69.8% | 1.5559      | 3.0019  | 1.4512 | -51.7% | 2.2953      |
| $X_3$                                                                                                                                                          | 0.5137 | 0.4796 | -6.6%  | 0.4866      | 0.5445 | 0.4398 | -19.2% | 0.4498      | 0.5549 | 0.3792 | -31.7% | 0.3841      | 0.5029  | 0.5529 | 9.9%   | 0.6219      |
| Scenario (1): $X_2 \sim \text{Bernoulli}(0.3)$ , $M_{00} = 0.8$ , and $M_{11} = 0.8$ , $X_1 \sim \text{Uniform}(-2, 2)$ , $X_3 \sim \text{Bernoulli}(0.5)$     |        |        |        |             |        |        |        |             |        |        |        |             |         |        |        |             |
| $C$                                                                                                                                                            | .9892  | 1.3146 | 32.9%  | 1.0429      | 1.0664 | 1.2083 | 13.3%  | 1.0590      | 0.9974 | 0.9422 | -5.5%  | 0.8707      | 0.9925  | 2.0521 | 106.8% | 1.4110      |
| $X_1$                                                                                                                                                          | 2.0039 | 1.9887 | -0.8%  | 1.9799      | 2.0220 | 1.7542 | -13.2% | 1.8521      | 1.9688 | 1.4012 | -28.8% | 1.5587      | 2.0019  | 2.0125 | 0.5%   | 2.0023      |
| $X_2$                                                                                                                                                          | 2.9993 | 1.5542 | -48.2% | 2.4779      | 2.8769 | 1.1806 | -59.0% | 1.9541      | 2.9648 | 1.0342 | -65.1% | 1.7541      | 3.0025  | 1.5572 | -48.1% | 2.5011      |
| $X_3$                                                                                                                                                          | 0.5115 | 0.5150 | 0.7%   | 0.5284      | 0.4923 | 0.3831 | -22.2% | 0.4338      | 0.4531 | 0.2609 | -42.4% | 0.2764      | 0.5021  | 0.3695 | -26.4% | 0.4556      |

14)  $X_2$  follows *Bernoulli*(0.3) and has misclassification with  $M_{00} = 0.6$ , and  $M_{11} = 0.5$ ;  $X_1$  follows uniform distribution with values in  $[-0.5, 0.5]$ ,  $[-1, 1]$ , or  $[-2, 2]$ ;  $X_3$  follows *Bernoulli* distribution with  $Pr(X_3 = 1)$  equals 0.3, 0.5, or 0.7.

|                                                                                                                                                                | OLS    |        |        |             | Logit  |        |        |             | Probit |        |        |             | Poisson |        |        |             |
|----------------------------------------------------------------------------------------------------------------------------------------------------------------|--------|--------|--------|-------------|--------|--------|--------|-------------|--------|--------|--------|-------------|---------|--------|--------|-------------|
|                                                                                                                                                                | $b$    | $b'$   | %      | $b_{simex}$ | $b$    | $b'$   | %      | $b_{simex}$ | $b$    | $b'$   | %      | $b_{simex}$ | $b$     | $b'$   | %      | $b_{simex}$ |
| Scenario (2): $X_2 \sim \text{Bernoulli}(0.3)$ , $M_{00} = 0.6$ , and $M_{11} = 0.5$ , $X_1 \sim \text{Uniform}(-0.5, 0.5)$ , $X_3 \sim \text{Bernoulli}(0.3)$ |        |        |        |             |        |        |        |             |        |        |        |             |         |        |        |             |
| $C$                                                                                                                                                            | 0.9924 | 1.7892 | 80.3%  | 1.6291      | 1.0505 | 1.4303 | 36.1%  | 1.3423      | 1.0117 | 1.1927 | 17.9%  | 1.0855      | 0.9884  | 2.8004 | 183.3% | 2.6619      |
| $X_1$                                                                                                                                                          | 2.0155 | 2.0041 | -0.6%  | 1.9913      | 1.9578 | 1.8845 | -3.7%  | 1.8836      | 2.0705 | 1.8403 | -11.1% | 1.8550      | 2.0108  | 2.0416 | 1.5%   | 2.0435      |
| $X_2$                                                                                                                                                          | 2.9989 | 0.2269 | -92.4% | 0.6009      | 2.8253 | 0.1117 | -96.0% | 0.3155      | 3.3947 | 0.1619 | -95.3% | 0.4373      | 3.0124  | 0.1867 | -93.8% | 0.4868      |
| $X_3$                                                                                                                                                          | 0.4985 | 0.5626 | 12.8%  | 0.5670      | 0.4417 | 0.4151 | -6.0%  | 0.4186      | 0.5923 | 0.4879 | -17.6% | 0.4871      | 0.4956  | 0.4787 | -3.4%  | 0.482       |
| Scenario (2): $X_2 \sim \text{Bernoulli}(0.3)$ , $M_{00} = 0.6$ , and $M_{11} = 0.5$ , $X_1 \sim \text{Uniform}(-0.5, 0.5)$ , $X_3 \sim \text{Bernoulli}(0.7)$ |        |        |        |             |        |        |        |             |        |        |        |             |         |        |        |             |
| $C$                                                                                                                                                            | 0.9911 | 1.7859 | 80.2%  | 1.5983      | 1.0233 | 1.3619 | 33.1%  | 1.2242      | 0.9356 | 1.1403 | 21.9%  | 1.0863      | 0.9731  | 2.7619 | 183.8% | 2.5937      |
| $X_1$                                                                                                                                                          | 2.0122 | 2.0497 | 1.9%   | 2.0387      | 1.8775 | 1.7623 | -6.1%  | 1.7681      | 2.1337 | 1.8471 | -13.4% | 1.8461      | 2.0137  | 2.0442 | 1.5%   | 2.0594      |
| $X_2$                                                                                                                                                          | 2.9889 | 0.2726 | -90.9% | 0.7244      | 3.0746 | 0.2160 | -93.0% | 0.5553      | 3.3342 | 0.0864 | -97.6% | 0.2149      | 3.0157  | 0.2369 | -92.1% | 0.6053      |
| $X_3$                                                                                                                                                          | 0.5252 | 0.4830 | -8.0%  | 0.4782      | 0.4455 | 0.4309 | -3.3%  | 0.4343      | 0.5777 | 0.5219 | -9.7%  | 0.5246      | 0.5072  | 0.5298 | 4.5%   | 0.5313      |
| Scenario (2): $X_2 \sim \text{Bernoulli}(0.3)$ , $M_{00} = 0.6$ , and $M_{11} = 0.5$ , $X_1 \sim \text{Uniform}(-0.5, 0.5)$ , $X_3 \sim \text{Bernoulli}(0.5)$ |        |        |        |             |        |        |        |             |        |        |        |             |         |        |        |             |
| $C$                                                                                                                                                            | 0.9899 | 1.7690 | 78.7%  | 1.5304      | 0.9315 | 1.3138 | 41.0%  | 1.2014      | 1.0224 | 1.2067 | 18.0%  | 1.1554      | 0.9965  | 2.7844 | 179.4% | 2.6327      |
| $X_1$                                                                                                                                                          | 2.0172 | 2.1480 | 6.5%   | 2.1389      | 1.8365 | 1.7155 | -6.6%  | 1.7184      | 1.8298 | 1.6753 | -8.4%  | 1.6732      | 1.9919  | 1.8323 | -8.0%  | 1.8346      |
| $X_2$                                                                                                                                                          | 2.9850 | 0.3199 | -89.3% | 0.8643      | 3.2076 | 0.1757 | -94.5% | 0.4490      | 3.2239 | 0.0978 | -97.2% | 0.2316      | 3.0044  | 0.2021 | -93.3% | 0.5292      |
| $X_3$                                                                                                                                                          | 0.5307 | 0.5085 | -4.2%  | 0.5115      | 0.5244 | 0.4865 | -7.2%  | 0.4880      | 0.5059 | 0.4604 | -9.0%  | 0.4599      | 0.4929  | 0.4638 | -5.9%  | 0.4657      |
| Scenario (2): $X_2 \sim \text{Bernoulli}(0.3)$ , $M_{00} = 0.6$ , and $M_{11} = 0.5$ , $X_1 \sim \text{Uniform}(-1, 1)$ , $X_3 \sim \text{Bernoulli}(0.3)$     |        |        |        |             |        |        |        |             |        |        |        |             |         |        |        |             |
| $C$                                                                                                                                                            | 1.0120 | 1.8187 | 79.7%  | 1.6482      | 1.0030 | 1.3417 | 33.8%  | 1.1744      | 0.9478 | 1.1815 | 24.7%  | 1.1347      | 0.9961  | 2.7792 | 179.0% | 2.5250      |
| $X_1$                                                                                                                                                          | 1.9822 | 1.9597 | -1.1%  | 1.9648      | 2.1075 | 1.8989 | -9.9%  | 1.9138      | 1.8846 | 1.5313 | -18.7% | 1.5315      | 1.9997  | 1.9260 | -3.7%  | 1.9155      |
| $X_2$                                                                                                                                                          | 3.0035 | 0.2398 | -92.0% | 0.6432      | 2.8908 | 0.2518 | -91.3% | 0.6495      | 3.0494 | 0.0599 | -98.0% | 0.1692      | 3.0030  | 0.3222 | -89.3% | 0.8654      |
| $X_3$                                                                                                                                                          | 0.4721 | 0.4699 | -0.5%  | 0.4691      | 0.5592 | 0.4943 | -11.6% | 0.5050      | 0.5312 | 0.4100 | -22.8% | 0.4073      | 0.5029  | 0.5360 | 6.6%   | 0.5381      |
| Scenario (2): $X_2 \sim \text{Bernoulli}(0.3)$ , $M_{00} = 0.6$ , and $M_{11} = 0.5$ , $X_1 \sim \text{Uniform}(-1, 1)$ , $X_3 \sim \text{Bernoulli}(0.7)$     |        |        |        |             |        |        |        |             |        |        |        |             |         |        |        |             |
| $C$                                                                                                                                                            | 0.9842 | 1.8781 | 90.8%  | 1.7461      | 0.9687 | 1.3306 | 37.4%  | 1.1680      | 1.0362 | 1.2423 | 19.9%  | 1.1685      | 1.0043  | 2.7680 | 175.6% | 2.7140      |
| $X_1$                                                                                                                                                          | 2.0066 | 2.0283 | 1.1%   | 2.0314      | 2.0539 | 1.8430 | -10.3% | 1.8463      | 1.9074 | 1.6157 | -15.3% | 1.6208      | 2.0009  | 2.0685 | 3.4%   | 2.0681      |
| $X_2$                                                                                                                                                          | 3.0219 | 0.1864 | -93.8% | 0.4951      | 3.2226 | 0.2220 | -93.1% | 0.6164      | 2.9634 | 0.0831 | -97.3% | 0.2469      | 2.9898  | 0.0699 | -97.7% | 0.2087      |
| $X_3$                                                                                                                                                          | 0.5191 | 0.4191 | -19.3% | 0.4231      | 0.4762 | 0.4436 | -6.8%  | 0.4406      | 0.3919 | 0.3306 | -15.7% | 0.3353      | 0.5010  | 0.5956 | 18.9%  | 0.5876      |
| Scenario (2): $X_2 \sim \text{Bernoulli}(0.3)$ , $M_{00} = 0.6$ , and $M_{11} = 0.5$ , $X_1 \sim \text{Uniform}(-1, 1)$ , $X_3 \sim \text{Bernoulli}(0.5)$     |        |        |        |             |        |        |        |             |        |        |        |             |         |        |        |             |
| $C$                                                                                                                                                            | 1.0114 | 1.8121 | 79.2%  | 1.6162      | 0.9985 | 1.4094 | 41.2%  | 1.2665      | 1.0002 | 1.2314 | 23.1%  | 1.1926      | 0.9920  | 2.8743 | 189.8% | 2.7126      |
| $X_1$                                                                                                                                                          | 2.0180 | 2.0475 | 1.5%   | 2.0478      | 2.0805 | 1.8630 | -10.5% | 1.8536      | 2.0459 | 1.7375 | -15.1% | 1.7368      | 1.9991  | 1.9698 | -1.5%  | 1.9773      |
| $X_2$                                                                                                                                                          | 2.9759 | 0.2767 | -90.7% | 0.7294      | 3.2144 | 0.1971 | -93.9% | 0.5268      | 3.0085 | 0.0655 | -97.8% | 0.1586      | 3.0018  | 0.2015 | -93.3% | 0.5341      |
| $X_3$                                                                                                                                                          | 0.4839 | 0.4221 | -12.8% | 0.4211      | 0.5792 | 0.4532 | -21.7% | 0.4606      | 0.5236 | 0.4246 | -18.9% | 0.4205      | 0.5103  | 0.4509 | -11.6% | 0.4         |
| Scenario (2): $X_2 \sim \text{Bernoulli}(0.3)$ , $M_{00} = 0.6$ , and $M_{11} = 0.5$ , $X_1 \sim \text{Uniform}(-2, 2)$ , $X_3 \sim \text{Bernoulli}(0.3)$     |        |        |        |             |        |        |        |             |        |        |        |             |         |        |        |             |
| $C$                                                                                                                                                            | 1.0079 | 1.8109 | 79.7%  | 1.6491      | 0.9994 | 1.3943 | 39.5%  | 1.2237      | 1.0883 | 1.1836 | 8.8%   | 1.0673      | 1.0031  | 2.7184 | 171.0% | 2.5792      |
| $X_1$                                                                                                                                                          | 2.0090 | 2.0440 | 1.7%   | 2.0452      | 2.0507 | 1.6989 | -17.2% | 1.7127      | 2.0010 | 1.2489 | -37.6% | 1.2546      | 1.9979  | 2.0517 | 2.7%   | 2.0583      |
| $X_2$                                                                                                                                                          | 3.0043 | 0.2414 | -92.0% | 0.6250      | 2.9963 | 0.2626 | -91.2% | 0.6890      | 2.9842 | 0.1642 | -94.5% | 0.4416      | 2.9985  | 0.2034 | -93.2% | 0.5139      |
| $X_3$                                                                                                                                                          | 0.4998 | 0.4613 | -7.7%  | 0.4523      | 0.5766 | 0.4399 | -23.7% | 0.4558      | 0.4243 | 0.2034 | -52.1% | 0.2103      | 0.5019  | 0.4565 | -9.0%  | 0.4527      |
| Scenario (2): $X_2 \sim \text{Bernoulli}(0.3)$ , $M_{00} = 0.6$ , and $M_{11} = 0.5$ , $X_1 \sim \text{Uniform}(-2, 2)$ , $X_3 \sim \text{Bernoulli}(0.7)$     |        |        |        |             |        |        |        |             |        |        |        |             |         |        |        |             |
| $C$                                                                                                                                                            | 0.9902 | 1.8149 | 83.3%  | 1.6697      | 1.1352 | 1.4857 | 30.9%  | 1.2847      | 1.0132 | 1.1437 | 12.9%  | 1.0246      | 1.0002  | 2.6701 | 167.0% | 2.4796      |
| $X_1$                                                                                                                                                          | 1.9908 | 1.9829 | -0.4%  | 1.9801      | 1.9058 | 1.6152 | -15.2% | 1.6339      | 1.9356 | 1.2603 | -34.9% | 1.2665      | 1.9985  | 2.1054 | 5.3%   | 2.0968      |
| $X_2$                                                                                                                                                          | 3.0184 | 0.2229 | -92.6% | 0.5845      | 2.7627 | 0.3123 | -88.7% | 0.8132      | 2.9415 | 0.1595 | -94.6% | 0.4497      | 3.0035  | 0.2619 | -91.3% | 0.6831      |
| $X_3$                                                                                                                                                          | 0.5012 | 0.4718 | -5.9%  | 0.4633      | 0.3806 | 0.2936 | -22.9% | 0.2983      | 0.3916 | 0.2297 | -41.3% | 0.2329      | 0.4974  | 0.5116 | 2.9%   | 0.5017      |
| Scenario (2): $X_2 \sim \text{Bernoulli}(0.3)$ , $M_{00} = 0.6$ , and $M_{11} = 0.5$ , $X_1 \sim \text{Uniform}(-2, 2)$ , $X_3 \sim \text{Bernoulli}(0.5)$     |        |        |        |             |        |        |        |             |        |        |        |             |         |        |        |             |
| $C$                                                                                                                                                            | 0.9953 | 1.8488 | 85.8%  | 1.6449      | 0.9964 | 1.4600 | 46.5%  | 1.4245      | 1.1396 | 1.2357 | 8.4%   | 1.1761      | 0.9950  | 2.7345 | 174.8% | 2.5390      |
| $X_1$                                                                                                                                                          | 1.9991 | 2.0215 | 1.1%   | 2.0197      | 1.9320 | 1.5700 | -18.7% | 1.5695      | 2.0647 | 1.3232 | -35.9% | 1.3252      | 2.0008  | 2.0038 | 0.2%   | 2.0119      |
| $X_2$                                                                                                                                                          | 3.0053 | 0.2807 | -90.7% | 0.7438      | 2.8823 | 0.0379 | -98.7% | 0.1180      | 3.0125 | 0.0943 | -96.9% | 0.2375      | 3.0024  | 0.2622 | -91.3% | 0.6895      |
| $X_3$                                                                                                                                                          | 0.5054 | 0.3801 | -24.8% | 0.3937      | 0.5341 | 0.4004 | -25.0% | 0.3989      | 0.4181 | 0.2697 | -35.5% | 0.2714      | 0.5033  | 0.5984 | 18.9%  | 0.5897      |

15)  $X_2$  follows *Bernoulli*(0.5) and has misclassification with  $M_{00} = 0.6$ , and  $M_{11} = 0.5$ ;  $X_1$  follows uniform distribution with values in  $[-0.5, 0.5]$ ,  $[-1, 1]$ , or  $[-2, 2]$ ;  $X_3$  follows *Bernoulli* distribution with  $Pr(X_3 = 1)$  equals 0.3, 0.5, or 0.7.

|                                                                                                                                                                | OLS    |        |        |             | Logit  |        |        |             | Probit |        |        |             | Poisson |        |        |             |
|----------------------------------------------------------------------------------------------------------------------------------------------------------------|--------|--------|--------|-------------|--------|--------|--------|-------------|--------|--------|--------|-------------|---------|--------|--------|-------------|
|                                                                                                                                                                | $b$    | $b'$   | %      | $b_{simex}$ | $b$    | $b'$   | %      | $b_{simex}$ | $b$    | $b'$   | %      | $b_{simex}$ | $b$     | $b'$   | %      | $b_{simex}$ |
| Scenario (3): $X_2 \sim \text{Bernoulli}(0.5)$ , $M_{00} = 0.6$ , and $M_{11} = 0.5$ , $X_1 \sim \text{Uniform}(-0.5, 0.5)$ , $X_3 \sim \text{Bernoulli}(0.3)$ |        |        |        |             |        |        |        |             |        |        |        |             |         |        |        |             |
| $C$                                                                                                                                                            | 0.9929 | 2.3837 | 140.1% | 2.2049      | 1.0197 | 1.7819 | 74.8%  | 1.7763      | 1.0521 | 1.4029 | 33.3%  | 1.3152      | 0.9885  | 3.2626 | 230.0% | 3.0909      |
| $X_1$                                                                                                                                                          | 1.9781 | 1.9683 | -0.5%  | 1.9731      | 1.9836 | 1.7387 | -12.3% | 1.7388      | 2.0698 | 1.6579 | -19.9% | 1.6575      | 2.0047  | 2.0178 | 0.6%   | 2.0162      |
| $X_2$                                                                                                                                                          | 3.0171 | 0.2219 | -92.6% | 0.6138      | 2.9218 | 0.0219 | -99.3% | 0.0326      | 2.4498 | 0.1360 | -94.4% | 0.3515      | 3.0180  | 0.2121 | -93.0% | 0.5643      |
| $X_3$                                                                                                                                                          | 0.5088 | 0.6039 | 18.7%  | 0.6156      | 0.4731 | 0.4608 | -2.6%  | 0.4598      | 0.4887 | 0.4269 | -12.6% | 0.4188      | 0.4935  | 0.4976 | 0.8%   | 0.5008      |
| Scenario (3): $X_2 \sim \text{Bernoulli}(0.5)$ , $M_{00} = 0.6$ , and $M_{11} = 0.5$ , $X_1 \sim \text{Uniform}(-0.5, 0.5)$ , $X_3 \sim \text{Bernoulli}(0.7)$ |        |        |        |             |        |        |        |             |        |        |        |             |         |        |        |             |
| $C$                                                                                                                                                            | 0.9881 | 2.3963 | 142.5% | 2.1807      | 1.1129 | 1.8089 | 62.5%  | 1.6659      | 1.0090 | 1.4105 | 39.8%  | 1.3455      | 1.0017  | 3.2883 | 228.3% | 3.1769      |
| $X_1$                                                                                                                                                          | 1.9810 | 1.9091 | -3.6%  | 1.9157      | 1.9375 | 1.7048 | -12.0% | 1.6979      | 2.0850 | 1.7157 | -17.7% | 1.7197      | 2.0082  | 1.9740 | -1.7%  | 1.9721      |
| $X_2$                                                                                                                                                          | 3.0153 | 0.2883 | -90.4% | 0.7727      | 2.9735 | 0.2150 | -92.8% | 0.5545      | 2.3285 | 0.0901 | -96.1% | 0.2418      | 2.9933  | 0.1462 | -95.1% | 0.3841      |
| $X_3$                                                                                                                                                          | 0.5094 | 0.4835 | -5.1%  | 0.4749      | 0.2577 | 0.2063 | -20.0% | 0.2021      | 0.5553 | 0.4360 | -21.5% | 0.4338      | 0.5037  | 0.4884 | -3.0%  | 0.4833      |
| Scenario (3): $X_2 \sim \text{Bernoulli}(0.5)$ , $M_{00} = 0.6$ , and $M_{11} = 0.5$ , $X_1 \sim \text{Uniform}(-0.5, 0.5)$ , $X_3 \sim \text{Bernoulli}(0.5)$ |        |        |        |             |        |        |        |             |        |        |        |             |         |        |        |             |
| $C$                                                                                                                                                            | 0.9965 | 2.4224 | 143.1% | 2.2428      | 1.0222 | 1.7361 | 69.8%  | 1.5496      | 0.9406 | 1.3238 | 40.7%  | 1.2120      | 1.0186  | 3.2189 | 216.0% | 3.0646      |
| $X_1$                                                                                                                                                          | 1.9747 | 1.9592 | -0.8%  | 1.9585      | 2.0751 | 1.8660 | -10.1% | 1.8736      | 2.1333 | 1.7205 | -19.4% | 1.7303      | 2.0048  | 2.1874 | 9.1%   | 2.1749      |
| $X_2$                                                                                                                                                          | 2.9795 | 0.2264 | -92.4% | 0.6123      | 3.2037 | 0.2524 | -92.1% | 0.6980      | 2.6007 | 0.1362 | -95.0% | 0.3884      | 2.9776  | 0.1959 | -93.4% | 0.5177      |
| $X_3$                                                                                                                                                          | 0.5033 | 0.4530 | -10.0% | 0.4619      | 0.4887 | 0.4269 | -12.7% | 0.4291      | 0.6944 | 0.5522 | -20.5% | 0.5601      | 0.4998  | 0.5567 | 11.4%  | 0.5611      |
| Scenario (3): $X_2 \sim \text{Bernoulli}(0.5)$ , $M_{00} = 0.6$ , and $M_{11} = 0.5$ , $X_1 \sim \text{Uniform}(-1, 1)$ , $X_3 \sim \text{Bernoulli}(0.3)$     |        |        |        |             |        |        |        |             |        |        |        |             |         |        |        |             |
| $C$                                                                                                                                                            | 1.0131 | 2.3821 | 135.1% | 2.1674      | 0.9220 | 1.6489 | 78.8%  | 1.4740      | 1.0088 | 1.4211 | 40.9%  | 1.3520      | 1.0002  | 3.2667 | 226.6% | 3.1080      |
| $X_1$                                                                                                                                                          | 1.9952 | 1.9436 | -2.6%  | 1.9434      | 1.9041 | 1.6266 | -14.6% | 1.6226      | 2.0066 | 1.4450 | -28.0% | 1.4457      | 1.9994  | 2.0098 | 0.5%   | 2.0142      |
| $X_2$                                                                                                                                                          | 2.9905 | 0.2987 | -90.0% | 0.7874      | 2.9182 | 0.2517 | -91.4% | 0.6628      | 2.9408 | 0.0958 | -96.7% | 0.2513      | 2.9978  | 0.2018 | -93.3% | 0.5415      |
| $X_3$                                                                                                                                                          | 0.5103 | 0.4278 | -16.2% | 0.4149      | 0.6485 | 0.4808 | -25.9% | 0.4730      | 0.5426 | 0.3636 | -33.0% | 0.3687      | 0.4998  | 0.5418 | 8.4%   | 0.5339      |
| Scenario (3): $X_2 \sim \text{Bernoulli}(0.5)$ , $M_{00} = 0.6$ , and $M_{11} = 0.5$ , $X_1 \sim \text{Uniform}(-1, 1)$ , $X_3 \sim \text{Bernoulli}(0.7)$     |        |        |        |             |        |        |        |             |        |        |        |             |         |        |        |             |
| $C$                                                                                                                                                            | 1.0042 | 2.3004 | 129.1% | 2.0478      | 0.9246 | 1.7536 | 89.7%  | 1.6057      | 0.9083 | 1.3538 | 49.0%  | 1.3269      | 1.0010  | 3.3040 | 230.1% | 3.1500      |
| $X_1$                                                                                                                                                          | 1.9832 | 2.0256 | 2.1%   | 2.0297      | 2.0442 | 1.6805 | -17.8% | 1.6942      | 2.0306 | 1.5183 | -25.2% | 1.5188      | 2.0017  | 1.9321 | -3.5%  | 1.9296      |
| $X_2$                                                                                                                                                          | 3.0210 | 0.3313 | -89.0% | 0.8965      | 3.1383 | 0.1990 | -93.7% | 0.5460      | 2.9901 | 0.0257 | -99.1% | 0.0842      | 2.9991  | 0.1889 | -93.7% | 0.4904      |
| $X_3$                                                                                                                                                          | 0.4902 | 0.6005 | 22.5%  | 0.5974      | 0.4961 | 0.3234 | -34.8% | 0.3270      | 0.6082 | 0.4628 | -23.9% | 0.4625      | 0.4973  | 0.4754 | -4.4%  | 0.4847      |
| Scenario (3): $X_2 \sim \text{Bernoulli}(0.5)$ , $M_{00} = 0.6$ , and $M_{11} = 0.5$ , $X_1 \sim \text{Uniform}(-1, 1)$ , $X_3 \sim \text{Bernoulli}(0.5)$     |        |        |        |             |        |        |        |             |        |        |        |             |         |        |        |             |
| $C$                                                                                                                                                            | 0.9914 | 2.3655 | 138.6% | 2.1686      | 1.0389 | 1.7345 | 67.0%  | 1.4952      | 0.9578 | 1.3717 | 43.2%  | 1.2747      | 1.0190  | 3.2493 | 218.9% | 3.1102      |
| $X_1$                                                                                                                                                          | 2.0013 | 2.0145 | 0.7%   | 2.0163      | 1.8636 | 1.6040 | -13.9% | 1.6177      | 1.9228 | 1.4376 | -25.2% | 1.4436      | 1.9959  | 1.9995 | 0.2%   | 2.0086      |
| $X_2$                                                                                                                                                          | 3.0068 | 0.2686 | -91.1% | 0.7117      | 2.9582 | 0.3160 | -89.3% | 0.8767      | 3.0025 | 0.1453 | -95.2% | 0.3866      | 2.9829  | 0.1750 | -94.1% | 0.4703      |
| $X_3$                                                                                                                                                          | 0.5122 | 0.5312 | 3.7%   | 0.5382      | 0.3712 | 0.3067 | -17.4% | 0.3104      | 0.5358 | 0.3531 | -34.1% | 0.3483      | 0.5003  | 0.5622 | 12.4%  | 0.5672      |
| Scenario (3): $X_2 \sim \text{Bernoulli}(0.5)$ , $M_{00} = 0.6$ , and $M_{11} = 0.5$ , $X_1 \sim \text{Uniform}(-2, 2)$ , $X_3 \sim \text{Bernoulli}(0.3)$     |        |        |        |             |        |        |        |             |        |        |        |             |         |        |        |             |
| $C$                                                                                                                                                            | 0.9773 | 2.3614 | 141.6% | 2.1558      | 1.1049 | 1.8775 | 69.9%  | 1.7161      | 0.9949 | 1.2864 | 29.3%  | 1.1231      | 0.9966  | 3.3293 | 234.1% | 3.1493      |
| $X_1$                                                                                                                                                          | 1.9998 | 2.0560 | 2.8%   | 2.0574      | 2.0068 | 1.5281 | -23.9% | 1.5334      | 2.0392 | 1.0677 | -47.6% | 1.0763      | 1.9996  | 1.9717 | -1.4%  | 1.9684      |
| $X_2$                                                                                                                                                          | 3.0365 | 0.2659 | -91.2% | 0.7101      | 2.9798 | 0.2285 | -92.3% | 0.5947      | 3.1473 | 0.2339 | -92.6% | 0.6380      | 3.0043  | 0.2271 | -92.4% | 0.6140      |
| $X_3$                                                                                                                                                          | 0.5047 | 0.5080 | 0.7%   | 0.4991      | 0.3996 | 0.2260 | -43.4% | 0.2280      | 0.4405 | 0.1897 | -56.9% | 0.1853      | 0.5006  | 0.4240 | -15.3% | 0.4290      |
| Scenario (3): $X_2 \sim \text{Bernoulli}(0.5)$ , $M_{00} = 0.6$ , and $M_{11} = 0.5$ , $X_1 \sim \text{Uniform}(-2, 2)$ , $X_3 \sim \text{Bernoulli}(0.7)$     |        |        |        |             |        |        |        |             |        |        |        |             |         |        |        |             |
| $C$                                                                                                                                                            | 0.9977 | 2.3306 | 133.6% | 2.0934      | 0.8935 | 1.7070 | 91.1%  | 1.4661      | 1.0503 | 1.3854 | 31.9%  | 1.2988      | 1.0005  | 3.3127 | 231.1% | 3.1659      |
| $X_1$                                                                                                                                                          | 1.9938 | 2.0016 | 0.4%   | 2.0014      | 1.9748 | 1.4642 | -25.9% | 1.4771      | 2.0382 | 1.1359 | -44.3% | 1.1376      | 2.0024  | 1.9719 | -1.5%  | 1.9626      |
| $X_2$                                                                                                                                                          | 2.9854 | 0.3019 | -89.9% | 0.8031      | 3.0934 | 0.3586 | -88.4% | 0.9609      | 3.0018 | 0.1334 | -95.6% | 0.3479      | 2.9986  | 0.1929 | -93.6% | 0.5064      |
| $X_3$                                                                                                                                                          | 0.5134 | 0.5220 | 1.7%   | 0.5396      | 0.4986 | 0.3339 | -33.0% | 0.3340      | 0.4254 | 0.1677 | -60.6% | 0.1652      | 0.4966  | 0.5053 | 1.7%   | 0.5207      |
| Scenario (3): $X_2 \sim \text{Bernoulli}(0.5)$ , $M_{00} = 0.6$ , and $M_{11} = 0.5$ , $X_1 \sim \text{Uniform}(-2, 2)$ , $X_3 \sim \text{Bernoulli}(0.5)$     |        |        |        |             |        |        |        |             |        |        |        |             |         |        |        |             |
| $C$                                                                                                                                                            | 0.9861 | 2.4170 | 145.1% | 2.2718      | 1.0238 | 1.7561 | 71.5%  | 1.5188      | 1.0122 | 1.3873 | 37.1%  | 1.3124      | 1.0003  | 3.2508 | 225.0% | 3.0931      |
| $X_1$                                                                                                                                                          | 2.0040 | 1.9866 | -0.9%  | 1.9851      | 1.9909 | 1.5233 | -23.5% | 1.5315      | 2.0114 | 1.1647 | -42.1% | 1.1637      | 1.9999  | 2.0230 | 1.2%   | 2.0216      |
| $X_2$                                                                                                                                                          | 3.0057 | 0.2000 | -93.3% | 0.5230      | 3.0407 | 0.3090 | -89.8% | 0.8524      | 2.9534 | 0.1020 | -96.5% | 0.2809      | 3.0029  | 0.1999 | -93.3% | 0.5426      |
| $X_3$                                                                                                                                                          | 0.5115 | 0.4825 | -5.7%  | 0.4772      | 0.3649 | 0.2830 | -22.4% | 0.2889      | 0.5512 | 0.2600 | -52.8% | 0.2523      | 0.4974  | 0.4518 | -9.2%  | 0.4468      |

16)  $X_2$  follows *Bernoulli*(0.3) and has misclassification with  $M_{00} = 0.8$ , and  $M_{11} = 0.8$ ;  $X_1$  follows *Bernoulli* distribution with  $Pr(X_1 = 1)$  equals 0.3, 0.5, or 0.7;  $X_3$  follows normal distribution with standard deviation 0.5, 1, or 2.

|                                                                                                                                                  | OLS      |           |        |                          | Logit    |           |        |                          | Probit   |           |        |                          | Poisson  |           |        |                          |
|--------------------------------------------------------------------------------------------------------------------------------------------------|----------|-----------|--------|--------------------------|----------|-----------|--------|--------------------------|----------|-----------|--------|--------------------------|----------|-----------|--------|--------------------------|
|                                                                                                                                                  | <i>b</i> | <i>b'</i> | %      | <i>b<sub>simex</sub></i> |
| Scenario (1): $X_2 \sim \text{Bernoulli}(0.3)$ , $M_{00} = 0.8$ , and $M_{11} = 0.8$ , $X_1 \sim \text{Bernoulli}(0.3)$ , $X_3 \sim N(0, 0.5^2)$ |          |           |        |                          |          |           |        |                          |          |           |        |                          |          |           |        |                          |
| <i>C</i>                                                                                                                                         | 1.0047   | 1.2853    | 27.9%  | 1.0191                   | 1.0108   | 1.1476    | 13.5%  | 1.0177                   | 1.0171   | 1.0890    | 7.1%   | 1.0221                   | 0.9908   | 2.0204    | 103.9% | 1.4144                   |
| $X_1$                                                                                                                                            | 1.9948   | 2.0199    | 1.3%   | 2.0069                   | 1.9734   | 1.9012    | -3.7%  | 1.9240                   | 1.8798   | 1.8024    | -4.1%  | 1.8535                   | 1.9993   | 2.0105    | 0.6%   | 1.9757                   |
| $X_2$                                                                                                                                            | 2.9896   | 1.5725    | -47.4% | 2.5241                   | 3.0977   | 1.0125    | -67.3% | 1.7320                   | 4.9821   | 0.4777    | -90.4% | 0.8039                   | 3.0072   | 1.5770    | -47.6% | 2.5537                   |
| $X_3$                                                                                                                                            | 0.5075   | 0.5168    | 1.8%   | 0.4929                   | 0.4353   | 0.3815    | -12.4% | 0.4031                   | 0.5372   | 0.4856    | -9.6%  | 0.4774                   | 0.5067   | 0.4827    | -4.7%  | 0.4828                   |
| Scenario (1): $X_2 \sim \text{Bernoulli}(0.3)$ , $M_{00} = 0.8$ , and $M_{11} = 0.8$ , $X_1 \sim \text{Bernoulli}(0.3)$ , $X_3 \sim N(0, 1^2)$   |          |           |        |                          |          |           |        |                          |          |           |        |                          |          |           |        |                          |
| <i>C</i>                                                                                                                                         | 0.9788   | 1.2765    | 30.4%  | 1.0005                   | 1.0154   | 1.1462    | 12.9%  | 1.0075                   | 1.0241   | 1.0744    | 4.9%   | 1.0042                   | 1.0002   | 2.0154    | 101.5% | 1.4186                   |
| $X_1$                                                                                                                                            | 2.0072   | 2.0325    | 1.3%   | 2.0183                   | 2.1205   | 2.0417    | -3.7%  | 2.0813                   | 1.8025   | 1.7025    | -5.5%  | 1.7433                   | 2.0006   | 2.0147    | 0.7%   | 2.0112                   |
| $X_2$                                                                                                                                            | 3.0136   | 1.5947    | -47.1% | 2.5592                   | 2.5784   | 0.9757    | -62.2% | 1.6912                   | 5.4040   | 0.6062    | -88.8% | 1.0353                   | 3.0014   | 1.5583    | -48.1% | 2.5103                   |
| $X_3$                                                                                                                                            | 0.5054   | 0.4916    | -2.7%  | 0.4899                   | 0.5158   | 0.4820    | -6.5%  | 0.5030                   | 0.4771   | 0.4180    | -12.4% | 0.4302                   | 0.5002   | 0.4514    | -9.8%  | 0.4360                   |
| Scenario (1): $X_2 \sim \text{Bernoulli}(0.3)$ , $M_{00} = 0.8$ , and $M_{11} = 0.8$ , $X_1 \sim \text{Bernoulli}(0.3)$ , $X_3 \sim N(0, 2^2)$   |          |           |        |                          |          |           |        |                          |          |           |        |                          |          |           |        |                          |
| <i>C</i>                                                                                                                                         | 1.0145   | 1.3340    | 31.5%  | 1.0568                   | 1.0247   | 1.1295    | 10.2%  | 0.9794                   | 0.9306   | 0.9741    | 4.7%   | 0.8993                   | 0.9948   | 2.0489    | 106.0% | 1.5239                   |
| $X_1$                                                                                                                                            | 2.0052   | 1.9454    | -3.0%  | 1.9456                   | 2.0997   | 2.0141    | -4.1%  | 2.0640                   | 1.8969   | 1.6607    | -12.4% | 1.7236                   | 2.0007   | 2.0310    | 1.5%   | 1.9935                   |
| $X_2$                                                                                                                                            | 2.9999   | 1.5546    | -48.2% | 2.4922                   | 3.1809   | 1.0846    | -65.9% | 1.8401                   | 2.8297   | 0.6630    | -76.6% | 1.1344                   | 3.0057   | 1.5236    | -49.3% | 2.4218                   |
| $X_3$                                                                                                                                            | 0.4960   | 0.4913    | -0.9%  | 0.4922                   | 0.4884   | 0.4471    | -8.4%  | 0.4726                   | 0.4770   | 0.3954    | -17.1% | 0.4183                   | 0.4993   | 0.4723    | -5.4%  | 0.4676                   |
| Scenario (1): $X_2 \sim \text{Bernoulli}(0.3)$ , $M_{00} = 0.8$ , and $M_{11} = 0.8$ , $X_1 \sim \text{Bernoulli}(0.5)$ , $X_3 \sim N(0, 0.5^2)$ |          |           |        |                          |          |           |        |                          |          |           |        |                          |          |           |        |                          |
| <i>C</i>                                                                                                                                         | 1.0007   | 1.2735    | 27.3%  | 0.9951                   | 0.9984   | 1.1307    | 13.2%  | 1.0267                   | 1.0652   | 1.1310    | 6.2%   | 1.0651                   | 0.9973   | 2.1105    | 111.6% | 1.5292                   |
| $X_1$                                                                                                                                            | 2.0125   | 2.0387    | 1.3%   | 2.0333                   | 1.9769   | 1.9284    | -2.5%  | 1.9455                   | 1.8254   | 1.7396    | -4.7%  | 1.7690                   | 1.9969   | 1.9779    | -1.0%  | 2.0025                   |
| $X_2$                                                                                                                                            | 2.9808   | 1.6444    | -44.8% | 2.6073                   | 2.7525   | 0.8487    | -69.2% | 1.3747                   | 4.7471   | 0.4921    | -89.6% | 0.8380                   | 3.0035   | 1.4944    | -50.2% | 2.4075                   |
| $X_3$                                                                                                                                            | 0.5065   | 0.4805    | -5.1%  | 0.4827                   | 0.6282   | 0.6084    | -3.1%  | 0.6027                   | 0.3429   | 0.3125    | -8.9%  | 0.3152                   | 0.5022   | 0.5496    | 9.4%   | 0.4917                   |
| Scenario (1): $X_2 \sim \text{Bernoulli}(0.3)$ , $M_{00} = 0.8$ , and $M_{11} = 0.8$ , $X_1 \sim \text{Bernoulli}(0.5)$ , $X_3 \sim N(0, 1^2)$   |          |           |        |                          |          |           |        |                          |          |           |        |                          |          |           |        |                          |
| <i>C</i>                                                                                                                                         | 1.0006   | 1.2329    | 23.2%  | 0.9452                   | 1.0391   | 1.1981    | 15.3%  | 1.0853                   | 1.0421   | 1.1057    | 6.1%   | 1.0410                   | 1.0077   | 2.0239    | 100.8% | 1.3961                   |
| $X_1$                                                                                                                                            | 1.9931   | 2.0888    | 4.8%   | 2.1282                   | 1.9456   | 1.8574    | -4.5%  | 1.8919                   | 1.8476   | 1.7091    | -7.5%  | 1.7512                   | 1.9872   | 1.9616    | -1.3%  | 1.9867                   |
| $X_2$                                                                                                                                            | 2.9845   | 1.5753    | -47.2% | 2.5217                   | 3.4716   | 0.9295    | -73.2% | 1.5260                   | 5.5686   | 0.5754    | -89.7% | 0.9837                   | 3.0014   | 1.5838    | -47.2% | 2.5529                   |
| $X_3$                                                                                                                                            | 0.4915   | 0.4937    | 0.5%   | 0.5051                   | 0.5151   | 0.5309    | 3.1%   | 0.5393                   | 0.5136   | 0.4619    | -10.1% | 0.4849                   | 0.5019   | 0.4828    | -3.8%  | 0.5090                   |
| Scenario (1): $X_2 \sim \text{Bernoulli}(0.3)$ , $M_{00} = 0.8$ , and $M_{11} = 0.8$ , $X_1 \sim \text{Bernoulli}(0.5)$ , $X_3 \sim N(0, 2^2)$   |          |           |        |                          |          |           |        |                          |          |           |        |                          |          |           |        |                          |
| <i>C</i>                                                                                                                                         | 0.9810   | 1.2624    | 28.7%  | 0.9875                   | 1.0245   | 1.1935    | 16.5%  | 1.0813                   | 1.1253   | 1.1475    | 2.0%   | 1.0750                   | 0.9984   | 2.1291    | 113.2% | 1.5069                   |
| $X_1$                                                                                                                                            | 1.9968   | 2.0145    | 0.9%   | 2.0086                   | 1.9431   | 1.8306    | -5.8%  | 1.8599                   | 2.0505   | 1.7909    | -12.7% | 1.8753                   | 1.9996   | 1.9407    | -2.9%  | 1.9970                   |
| $X_2$                                                                                                                                            | 3.0163   | 1.6260    | -46.1% | 2.6225                   | 2.8906   | 0.8710    | -69.9% | 1.4608                   | 2.8840   | 0.6693    | -76.8% | 1.1324                   | 2.9981   | 1.5569    | -48.1% | 2.4930                   |
| $X_3$                                                                                                                                            | 0.5000   | 0.5075    | 1.5%   | 0.4901                   | 0.4885   | 0.4394    | -10.1% | 0.4460                   | 0.5579   | 0.4644    | -16.8% | 0.4908                   | 0.5002   | 0.4689    | -6.3%  | 0.4742                   |
| Scenario (1): $X_2 \sim \text{Bernoulli}(0.3)$ , $M_{00} = 0.8$ , and $M_{11} = 0.8$ , $X_1 \sim \text{Bernoulli}(0.7)$ , $X_3 \sim N(0, 0.5^2)$ |          |           |        |                          |          |           |        |                          |          |           |        |                          |          |           |        |                          |
| <i>C</i>                                                                                                                                         | 0.9879   | 1.2512    | 26.7%  | 0.9647                   | 0.9456   | 1.0732    | 13.5%  | 0.9624                   | 0.9513   | 1.0099    | 6.2%   | 0.9284                   | 0.9903   | 2.0522    | 107.2% | 1.4613                   |
| $X_1$                                                                                                                                            | 2.0091   | 2.0734    | 3.2%   | 2.0918                   | 2.1322   | 2.0831    | -2.3%  | 2.1002                   | 1.8484   | 1.7692    | -4.3%  | 1.8175                   | 2.0073   | 1.9782    | -1.5%  | 1.9917                   |
| $X_2$                                                                                                                                            | 3.0180   | 1.5715    | -47.9% | 2.5149                   | 2.9281   | 0.8818    | -69.9% | 1.4831                   | 4.9611   | 0.5642    | -88.6% | 0.9902                   | 3.0044   | 1.5435    | -48.6% | 2.4722                   |
| $X_3$                                                                                                                                            | 0.5093   | 0.5813    | 14.1%  | 0.6228                   | 0.5410   | 0.5463    | 1.0%   | 0.5478                   | 0.4473   | 0.4110    | -8.1%  | 0.3999                   | 0.4992   | 0.4366    | -12.6% | 0.4629                   |
| Scenario (1): $X_2 \sim \text{Bernoulli}(0.3)$ , $M_{00} = 0.8$ , and $M_{11} = 0.8$ , $X_1 \sim \text{Bernoulli}(0.7)$ , $X_3 \sim N(0, 1^2)$   |          |           |        |                          |          |           |        |                          |          |           |        |                          |          |           |        |                          |
| <i>C</i>                                                                                                                                         | 0.9950   | 1.2448    | 25.1%  | 0.9775                   | 1.0108   | 1.1264    | 11.4%  | 0.9770                   | 1.0149   | 1.0390    | 2.4%   | 0.9590                   | 1.0119   | 2.0584    | 103.4% | 1.4913                   |
| $X_1$                                                                                                                                            | 1.9936   | 2.0335    | 2.0%   | 2.0262                   | 1.9049   | 1.8248    | -4.2%  | 1.8529                   | 2.0570   | 1.9793    | -3.8%  | 2.0924                   | 2.0012   | 2.0428    | 2.1%   | 2.0545                   |
| $X_2$                                                                                                                                            | 3.0208   | 1.6352    | -45.9% | 2.6384                   | 2.9894   | 1.1345    | -62.0% | 1.9887                   | 5.3765   | 0.6641    | -87.6% | 1.1238                   | 2.9898   | 1.4757    | -50.6% | 2.3639                   |
| $X_3$                                                                                                                                            | 0.4998   | 0.5055    | 1.1%   | 0.4972                   | 0.5551   | 0.5306    | -4.4%  | 0.5510                   | 0.4653   | 0.4188    | -10.0% | 0.4554                   | 0.4968   | 0.4720    | -5.0%  | 0.4842                   |
| Scenario (1): $X_2 \sim \text{Bernoulli}(0.3)$ , $M_{00} = 0.8$ , and $M_{11} = 0.8$ , $X_1 \sim \text{Bernoulli}(0.7)$ , $X_3 \sim N(0, 2^2)$   |          |           |        |                          |          |           |        |                          |          |           |        |                          |          |           |        |                          |
| <i>C</i>                                                                                                                                         | 0.9914   | 1.3224    | 33.4%  | 1.0546                   | 0.8995   | 0.9979    | 10.9%  | 0.8131                   | 0.8517   | 0.9133    | 7.2%   | 0.8282                   | 0.9995   | 1.9874    | 98.8%  | 1.4033                   |
| $X_1$                                                                                                                                            | 2.0081   | 1.9499    | -2.9%  | 1.9193                   | 1.9243   | 1.8150    | -5.7%  | 1.8710                   | 2.1856   | 1.8850    | -13.8% | 1.9380                   | 2.0030   | 1.9955    | -0.4%  | 1.9031                   |
| $X_2$                                                                                                                                            | 2.9918   | 1.5768    | -47.3% | 2.5124                   | 3.0846   | 1.2675    | -58.9% | 2.2581                   | 6.4808   | 0.6540    | -89.9% | 1.1273                   | 2.9983   | 1.6549    | -44.8% | 2.6683                   |
| $X_3$                                                                                                                                            | 0.4976   | 0.4914    | -1.3%  | 0.4894                   | 0.4994   | 0.4843    | -3.0%  | 0.5062                   | 0.4695   | 0.3857    | -17.8% | 0.3994                   | 0.4999   | 0.4732    | -5.3%  | 0.4691                   |

17)  $X_2$  follows *Bernoulli*(0.3) and has misclassification with  $M_{00} = 0.6$ , and  $M_{11} = 0.5$ ;  $X_1$  follows *Bernoulli* distribution with  $Pr(X_1 = 1)$  equals 0.3, 0.5, or 0.7;  $X_3$  follows normal distribution with standard deviation 0.5, 1, or 2.

|                                                                                                                                                  | OLS    |        |        |             | Logit  |        |        |             | Probit |         |         |             | Poisson |        |        |             |
|--------------------------------------------------------------------------------------------------------------------------------------------------|--------|--------|--------|-------------|--------|--------|--------|-------------|--------|---------|---------|-------------|---------|--------|--------|-------------|
|                                                                                                                                                  | $b$    | $b'$   | %      | $b_{simex}$ | $b$    | $b'$   | %      | $b_{simex}$ | $b$    | $b'$    | %       | $b_{simex}$ | $b$     | $b'$   | %      | $b_{simex}$ |
| Scenario (2): $X_2 \sim \text{Bernoulli}(0.3)$ , $M_{00} = 0.6$ , and $M_{11} = 0.5$ , $X_1 \sim \text{Bernoulli}(0.3)$ , $X_3 \sim N(0, 0.5^2)$ |        |        |        |             |        |        |        |             |        |         |         |             |         |        |        |             |
| $C$                                                                                                                                              | 1.0133 | 1.8172 | 79.3%  | 1.6605      | 1.0838 | 1.4626 | 34.9%  | 1.4094      | 1.0296 | 1.2050  | 17.0%   | 1.1303      | 1.0054  | 2.7726 | 175.8% | 2.6030      |
| $X_1$                                                                                                                                            | 1.9909 | 1.9769 | -0.7%  | 1.9738      | 1.7407 | 1.6695 | -4.1%  | 1.6696      | 1.9815 | 1.8531  | -6.5%   | 1.8691      | 2.0042  | 1.9986 | -0.3%  | 2.0060      |
| $X_2$                                                                                                                                            | 2.9660 | 0.2280 | -92.3% | 0.6072      | 2.5646 | 0.0607 | -97.6% | 0.1833      | 2.9565 | 0.1145  | -96.3%  | 0.2976      | 2.9900  | 0.2264 | -92.4% | 0.5931      |
| $X_3$                                                                                                                                            | 0.4947 | 0.4827 | -2.4%  | 0.4916      | 0.4643 | 0.4194 | -9.7%  | 0.4213      | 0.5008 | 0.4651  | -7.1%   | 0.4662      | 0.4937  | 0.5841 | 18.3%  | 0.5968      |
| Scenario (2): $X_2 \sim \text{Bernoulli}(0.3)$ , $M_{00} = 0.6$ , and $M_{11} = 0.5$ , $X_1 \sim \text{Bernoulli}(0.3)$ , $X_3 \sim N(0, 1^2)$   |        |        |        |             |        |        |        |             |        |         |         |             |         |        |        |             |
| $C$                                                                                                                                              | 0.9768 | 1.7512 | 79.3%  | 1.5507      | 0.9751 | 1.3007 | 33.4%  | 1.1156      | 0.9632 | 1.1558  | 20.0%   | 1.1013      | 1.0051  | 2.7879 | 177.4% | 2.5590      |
| $X_1$                                                                                                                                            | 2.0113 | 1.9616 | -2.5%  | 1.9532      | 2.1090 | 1.9866 | -5.8%  | 1.9941      | 2.5554 | 2.3417  | -8.4%   | 2.3526      | 1.9897  | 1.9740 | -0.8%  | 1.9857      |
| $X_2$                                                                                                                                            | 3.0019 | 0.2814 | -90.6% | 0.7544      | 2.8754 | 0.2751 | -90.4% | 0.7241      | 3.4332 | 0.0944  | -97.4%  | 0.2200      | 3.0017  | 0.2807 | -90.6% | 0.7690      |
| $X_3$                                                                                                                                            | 0.5030 | 0.5095 | 1.3%   | 0.5052      | 0.4891 | 0.4256 | -13.0% | 0.4239      | 0.5134 | 0.4498  | -12.4%  | 0.4508      | 0.5011  | 0.4581 | -8.6%  | 0.4592      |
| Scenario (2): $X_2 \sim \text{Bernoulli}(0.3)$ , $M_{00} = 0.6$ , and $M_{11} = 0.5$ , $X_1 \sim \text{Bernoulli}(0.3)$ , $X_3 \sim N(0, 2^2)$   |        |        |        |             |        |        |        |             |        |         |         |             |         |        |        |             |
| $C$                                                                                                                                              | 0.9888 | 1.8069 | 82.7%  | 1.6533      | 0.9902 | 1.3582 | 37.2%  | 1.1781      | 0.9619 | 1.1599  | 20.6%   | 1.0979      | 0.9995  | 2.7090 | 171.0% | 2.5000      |
| $X_1$                                                                                                                                            | 1.9800 | 2.0214 | 2.1%   | 2.0176      | 1.7289 | 1.6022 | -7.3%  | 1.6118      | 2.0077 | 1.6817  | -16.2%  | 1.6746      | 1.9986  | 2.0508 | 2.6%   | 2.0415      |
| $X_2$                                                                                                                                            | 3.0071 | 0.2187 | -92.7% | 0.5795      | 3.2873 | 0.2476 | -92.5% | 0.6852      | 2.9679 | 0.0779  | -97.4%  | 0.2266      | 3.0013  | 0.2585 | -91.4% | 0.7060      |
| $X_3$                                                                                                                                            | 0.5028 | 0.4927 | -2.0%  | 0.4924      | 0.4991 | 0.4417 | -11.5% | 0.4432      | 0.4770 | 0.3852  | -19.2%  | 0.3869      | 0.5003  | 0.5259 | 5.1%   | 0.5308      |
| Scenario (2): $X_2 \sim \text{Bernoulli}(0.3)$ , $M_{00} = 0.6$ , and $M_{11} = 0.5$ , $X_1 \sim \text{Bernoulli}(0.5)$ , $X_3 \sim N(0, 0.5^2)$ |        |        |        |             |        |        |        |             |        |         |         |             |         |        |        |             |
| $C$                                                                                                                                              | 0.9938 | 1.7998 | 81.1%  | 1.6159      | 0.9920 | 1.3705 | 38.2%  | 1.2660      | 1.0212 | 1.2686  | 24.2%   | 1.3086      | 1.0015  | 2.8574 | 185.3% | 2.6713      |
| $X_1$                                                                                                                                            | 2.0031 | 1.9974 | -0.3%  | 1.9976      | 2.0096 | 1.9038 | -5.3%  | 1.9079      | 1.7469 | 1.6074  | -8.0%   | 1.6029      | 1.9975  | 1.9595 | -1.9%  | 1.9551      |
| $X_2$                                                                                                                                            | 2.9980 | 0.2580 | -91.4% | 0.6776      | 2.9861 | 0.1380 | -95.4% | 0.3892      | 2.9331 | -0.0528 | -101.7% | -0.1481     | 3.0005  | 0.2361 | -92.1% | 0.6402      |
| $X_3$                                                                                                                                            | 0.4945 | 0.4488 | -9.2%  | 0.4487      | 0.4197 | 0.3700 | -11.8% | 0.3668      | 0.5576 | 0.4864  | -12.8%  | 0.4865      | 0.5012  | 0.4810 | -4.0%  | 0.4943      |
| Scenario (2): $X_2 \sim \text{Bernoulli}(0.3)$ , $M_{00} = 0.6$ , and $M_{11} = 0.5$ , $X_1 \sim \text{Bernoulli}(0.5)$ , $X_3 \sim N(0, 1^2)$   |        |        |        |             |        |        |        |             |        |         |         |             |         |        |        |             |
| $C$                                                                                                                                              | 1.0184 | 1.8018 | 76.9%  | 1.6377      | 0.9353 | 1.3571 | 45.1%  | 1.2809      | 1.0190 | 1.2438  | 22.1%   | 1.1931      | 1.0117  | 2.8039 | 177.2% | 2.6568      |
| $X_1$                                                                                                                                            | 1.9822 | 2.0379 | 2.8%   | 2.0296      | 2.2835 | 2.1669 | -5.1%  | 2.1642      | 2.1058 | 1.8820  | -10.6%  | 1.8815      | 1.9937  | 1.9580 | -1.8%  | 1.9508      |
| $X_2$                                                                                                                                            | 3.0207 | 0.2315 | -92.3% | 0.6198      | 3.6956 | 0.0979 | -97.4% | 0.2795      | 2.4731 | 0.0510  | -97.9%  | 0.1681      | 2.9945  | 0.1939 | -93.5% | 0.5133      |
| $X_3$                                                                                                                                            | 0.5022 | 0.5206 | 3.7%   | 0.5279      | 0.4910 | 0.4462 | -9.1%  | 0.4450      | 0.5082 | 0.4289  | -15.6%  | 0.4285      | 0.4975  | 0.5160 | 3.7%   | 0.5136      |
| Scenario (2): $X_2 \sim \text{Bernoulli}(0.3)$ , $M_{00} = 0.6$ , and $M_{11} = 0.5$ , $X_1 \sim \text{Bernoulli}(0.5)$ , $X_3 \sim N(0, 2^2)$   |        |        |        |             |        |        |        |             |        |         |         |             |         |        |        |             |
| $C$                                                                                                                                              | 1.0142 | 1.8320 | 80.6%  | 1.6681      | 0.9490 | 1.3356 | 40.7%  | 1.1520      | 0.9789 | 1.1876  | 21.3%   | 1.1206      | 0.9852  | 2.7573 | 179.9% | 2.5186      |
| $X_1$                                                                                                                                            | 1.9730 | 1.9374 | -1.8%  | 1.9328      | 2.1087 | 1.8891 | -10.4% | 1.9041      | 1.9659 | 1.6771  | -14.7%  | 1.6831      | 2.0053  | 2.0299 | 1.2%   | 2.0329      |
| $X_2$                                                                                                                                            | 3.0182 | 0.2381 | -92.1% | 0.6285      | 3.1968 | 0.2540 | -92.1% | 0.6674      | 3.1715 | 0.0907  | -97.1%  | 0.2497      | 3.0112  | 0.2702 | -91.0% | 0.7610      |
| $X_3$                                                                                                                                            | 0.5025 | 0.5112 | 1.7%   | 0.5120      | 0.5634 | 0.4968 | -11.8% | 0.5009      | 0.4968 | 0.3983  | -19.8%  | 0.3987      | 0.4993  | 0.5318 | 6.5%   | 0.5326      |
| Scenario (2): $X_2 \sim \text{Bernoulli}(0.3)$ , $M_{00} = 0.6$ , and $M_{11} = 0.5$ , $X_1 \sim \text{Bernoulli}(0.7)$ , $X_3 \sim N(0, 0.5^2)$ |        |        |        |             |        |        |        |             |        |         |         |             |         |        |        |             |
| $C$                                                                                                                                              | 0.9917 | 1.7397 | 75.4%  | 1.5790      | 0.9236 | 1.3091 | 41.7%  | 1.2758      | 1.0254 | 1.2772  | 24.6%   | 1.3017      | 1.0018  | 2.8050 | 180.0% | 2.6537      |
| $X_1$                                                                                                                                            | 2.0101 | 2.0295 | 1.0%   | 2.0189      | 1.9717 | 1.9219 | -2.5%  | 1.9208      | 1.8539 | 1.7155  | -7.5%   | 1.7189      | 1.9988  | 2.0220 | 1.2%   | 2.0213      |
| $X_2$                                                                                                                                            | 3.0157 | 0.2450 | -91.9% | 0.6395      | 2.4920 | 0.0270 | -98.9% | 0.1003      | 3.0012 | -0.0461 | -101.3% | -0.1082     | 3.0003  | 0.1909 | -93.6% | 0.5147      |
| $X_3$                                                                                                                                            | 0.5254 | 0.4870 | -7.3%  | 0.4876      | 0.5735 | 0.4887 | -14.8% | 0.4890      | 0.5761 | 0.5020  | -12.9%  | 0.5025      | 0.5038  | 0.4613 | -8.4%  | 0.4708      |
| Scenario (2): $X_2 \sim \text{Bernoulli}(0.3)$ , $M_{00} = 0.6$ , and $M_{11} = 0.5$ , $X_1 \sim \text{Bernoulli}(0.7)$ , $X_3 \sim N(0, 1^2)$   |        |        |        |             |        |        |        |             |        |         |         |             |         |        |        |             |
| $C$                                                                                                                                              | 1.0166 | 1.7811 | 75.2%  | 1.5905      | 1.0494 | 1.4554 | 38.7%  | 1.3825      | 0.9633 | 1.1598  | 20.4%   | 1.0903      | 0.9991  | 2.7996 | 180.2% | 2.6032      |
| $X_1$                                                                                                                                            | 1.9876 | 2.0274 | 2.0%   | 2.0329      | 1.8352 | 1.6990 | -7.4%  | 1.6958      | 2.3337 | 2.1369  | -8.4%   | 2.1299      | 2.0030  | 1.9706 | -1.6%  | 1.9650      |
| $X_2$                                                                                                                                            | 3.0166 | 0.2646 | -91.2% | 0.7006      | 2.7670 | 0.1125 | -95.9% | 0.2902      | 3.3847 | 0.1183  | -96.7%  | 0.3028      | 2.9974  | 0.2570 | -91.4% | 0.6807      |
| $X_3$                                                                                                                                            | 0.4977 | 0.4940 | -0.7%  | 0.4911      | 0.5127 | 0.4621 | -9.9%  | 0.4616      | 0.5251 | 0.4676  | -11.0%  | 0.466       | 0.4983  | 0.4734 | -5.0%  | 0.4720      |
| Scenario (2): $X_2 \sim \text{Bernoulli}(0.3)$ , $M_{00} = 0.6$ , and $M_{11} = 0.5$ , $X_1 \sim \text{Bernoulli}(0.7)$ , $X_3 \sim N(0, 2^2)$   |        |        |        |             |        |        |        |             |        |         |         |             |         |        |        |             |
| $C$                                                                                                                                              | 0.9973 | 1.8388 | 84.4%  | 1.6716      | 0.9895 | 1.4109 | 42.6%  | 1.3373      | 0.9207 | 1.1509  | 25.0%   | 1.0790      | 1.0104  | 2.7519 | 172.4% | 2.5207      |
| $X_1$                                                                                                                                            | 2.0087 | 1.9301 | -3.9%  | 1.9285      | 2.1141 | 1.9830 | -6.2%  | 1.9785      | 1.8845 | 1.5778  | -16.3%  | 1.5736      | 1.9941  | 2.0099 | 0.8%   | 2.0187      |
| $X_2$                                                                                                                                            | 3.0033 | 0.2391 | -92.0% | 0.6384      | 2.7060 | 0.0650 | -97.6% | 0.2326      | 3.3522 | 0.0808  | -97.6%  | 0.2468      | 2.9945  | 0.2814 | -90.6% | 0.7668      |
| $X_3$                                                                                                                                            | 0.4982 | 0.5005 | 0.5%   | 0.4991      | 0.5186 | 0.4843 | -6.6%  | 0.4839      | 0.4665 | 0.3834  | -17.8%  | 0.3820      | 0.4997  | 0.5045 | 0.9%   | 0.4982      |

18)  $X_2$  follows *Bernoulli*(0.5) and has misclassification with  $M_{00} = 0.6$ , and  $M_{11} = 0.5$ ;  $X_1$  follows *Bernoulli* distribution with  $Pr(X_1 = 1)$  equals 0.3, 0.5, or 0.7;  $X_3$  follows normal distribution with standard deviation 0.5, 1, or 2.

|                                                                                                                                                  | OLS    |        |        |             | Logit  |         |         |             | Probit |         |         |             | Poisson |        |        |             |
|--------------------------------------------------------------------------------------------------------------------------------------------------|--------|--------|--------|-------------|--------|---------|---------|-------------|--------|---------|---------|-------------|---------|--------|--------|-------------|
|                                                                                                                                                  | $b$    | $b'$   | %      | $b_{simex}$ | $b$    | $b'$    | %       | $b_{simex}$ | $b$    | $b'$    | %       | $b_{simex}$ | $b$     | $b'$   | %      | $b_{simex}$ |
| Scenario (3): $X_2 \sim \text{Bernoulli}(0.5)$ , $M_{00} = 0.6$ , and $M_{11} = 0.5$ , $X_1 \sim \text{Bernoulli}(0.3)$ , $X_3 \sim N(0, 0.5^2)$ |        |        |        |             |        |         |         |             |        |         |         |             |         |        |        |             |
| $C$                                                                                                                                              | 0.9990 | 2.3921 | 139.5% | 2.1872      | 1.1325 | 1.8009  | 59.0%   | 1.6720      | 1.0606 | 1.3969  | 31.7%   | 1.2746      | 0.9921  | 3.2984 | 232.5% | 3.1873      |
| $X_1$                                                                                                                                            | 1.9947 | 1.9887 | -0.3%  | 1.9888      | 2.0763 | 1.9975  | -3.8%   | 1.9995      | 1.8927 | 1.6696  | -11.8%  | 1.6752      | 1.9953  | 1.9716 | -1.2%  | 1.9633      |
| $X_2$                                                                                                                                            | 3.0053 | 0.2708 | -91.0% | 0.7295      | 2.9694 | 0.1843  | -93.8%  | 0.4835      | 3.1854 | 0.1644  | -95.0%  | 0.4404      | 3.0101  | 0.1426 | -95.3% | 0.3884      |
| $X_3$                                                                                                                                            | 0.5075 | 0.4771 | -6.0%  | 0.4636      | 0.4612 | 0.4402  | -4.6%   | 0.4437      | 0.6259 | 0.4965  | -20.7%  | 0.4957      | 0.4998  | 0.4318 | -13.6% | 0.4284      |
| Scenario (3): $X_2 \sim \text{Bernoulli}(0.5)$ , $M_{00} = 0.6$ , and $M_{11} = 0.5$ , $X_1 \sim \text{Bernoulli}(0.3)$ , $X_3 \sim N(0, 1^2)$   |        |        |        |             |        |         |         |             |        |         |         |             |         |        |        |             |
| $C$                                                                                                                                              | 0.9956 | 2.3938 | 140.4% | 2.2136      | 0.9600 | 1.6574  | 72.7%   | 1.5766      | 0.9596 | 1.3365  | 39.3%   | 1.2590      | 1.0023  | 3.2450 | 223.8% | 3.1015      |
| $X_1$                                                                                                                                            | 2.0069 | 1.9554 | -2.6%  | 1.9530      | 1.9095 | 1.8197  | -4.7%   | 1.8169      | 2.0778 | 1.7944  | -13.6%  | 1.7824      | 2.0084  | 1.9888 | -1.0%  | 1.9799      |
| $X_2$                                                                                                                                            | 2.9750 | 0.2420 | -91.9% | 0.6446      | 2.5873 | 0.1308  | -94.9%  | 0.3106      | 3.4817 | 0.0995  | -97.4%  | 0.2715      | 2.9923  | 0.1928 | -93.6% | 0.5019      |
| $X_3$                                                                                                                                            | 0.5056 | 0.5309 | 5.0%   | 0.5335      | 0.4386 | 0.3882  | -11.5%  | 0.3890      | 0.4244 | 0.3492  | -17.7%  | 0.3482      | 0.4968  | 0.5092 | 2.5%   | 0.5022      |
| Scenario (3): $X_2 \sim \text{Bernoulli}(0.5)$ , $M_{00} = 0.6$ , and $M_{11} = 0.5$ , $X_1 \sim \text{Bernoulli}(0.3)$ , $X_3 \sim N(0, 2^2)$   |        |        |        |             |        |         |         |             |        |         |         |             |         |        |        |             |
| $C$                                                                                                                                              | 1.0121 | 2.3552 | 132.7% | 2.1066      | 0.9994 | 1.7351  | 73.6%   | 1.5303      | 1.0197 | 1.4013  | 37.4%   | 1.3301      | 1.0013  | 3.1996 | 219.6% | 3.0208      |
| $X_1$                                                                                                                                            | 2.0050 | 2.0997 | 4.7%   | 2.1006      | 1.9639 | 1.6568  | -15.6%  | 1.6605      | 2.2327 | 1.6747  | -25.0%  | 1.6810      | 2.0042  | 2.0428 | 1.9%   | 2.0457      |
| $X_2$                                                                                                                                            | 3.0046 | 0.3291 | -89.0% | 0.8743      | 3.0117 | 0.2901  | -90.4%  | 0.7650      | 3.2787 | 0.1049  | -96.8%  | 0.2651      | 2.9941  | 0.2057 | -93.1% | 0.5630      |
| $X_3$                                                                                                                                            | 0.4960 | 0.5102 | 2.9%   | 0.5117      | 0.4800 | 0.4043  | -15.8%  | 0.4051      | 0.5305 | 0.3830  | -27.8%  | 0.3827      | 0.5001  | 0.5413 | 8.2%   | 0.5437      |
| Scenario (3): $X_2 \sim \text{Bernoulli}(0.5)$ , $M_{00} = 0.6$ , and $M_{11} = 0.5$ , $X_1 \sim \text{Bernoulli}(0.5)$ , $X_3 \sim N(0, 0.5^2)$ |        |        |        |             |        |         |         |             |        |         |         |             |         |        |        |             |
| $C$                                                                                                                                              | 0.9847 | 2.3527 | 138.9% | 2.1044      | 1.0247 | 1.7182  | 67.7%   | 1.5266      | 0.9534 | 1.2863  | 34.9%   | 1.1439      | 1.0033  | 3.2691 | 225.8% | 3.1127      |
| $X_1$                                                                                                                                            | 2.0126 | 1.9713 | -2.1%  | 1.9753      | 1.9877 | 1.8397  | -7.4%   | 1.8349      | 1.8684 | 1.6675  | -10.8%  | 1.6864      | 1.9966  | 1.9780 | -0.9%  | 1.9821      |
| $X_2$                                                                                                                                            | 3.0202 | 0.3326 | -89.0% | 0.8882      | 3.2154 | 0.2805  | -91.3%  | 0.7370      | 3.1631 | 0.1802  | -94.3%  | 0.5053      | 2.9980  | 0.1942 | -93.5% | 0.5180      |
| $X_3$                                                                                                                                            | 0.5064 | 0.5293 | 4.5%   | 0.5252      | 0.4907 | 0.4223  | -14.0%  | 0.4247      | 0.5600 | 0.4606  | -17.8%  | 0.4628      | 0.4963  | 0.4616 | -7.0%  | 0.4701      |
| Scenario (3): $X_2 \sim \text{Bernoulli}(0.5)$ , $M_{00} = 0.6$ , and $M_{11} = 0.5$ , $X_1 \sim \text{Bernoulli}(0.5)$ , $X_3 \sim N(0, 1^2)$   |        |        |        |             |        |         |         |             |        |         |         |             |         |        |        |             |
| $C$                                                                                                                                              | 0.9982 | 2.4251 | 143.0% | 2.1778      | 1.0623 | 1.8203  | 71.4%   | 1.8496      | 1.0070 | 1.4378  | 42.8%   | 1.4515      | 0.9988  | 3.2919 | 229.6% | 3.1692      |
| $X_1$                                                                                                                                            | 1.9927 | 1.8824 | -5.5%  | 1.8736      | 1.8572 | 1.7831  | -4.0%   | 1.7826      | 2.2402 | 1.9145  | -14.5%  | 1.9114      | 2.0030  | 1.9872 | -0.8%  | 1.9813      |
| $X_2$                                                                                                                                            | 2.9962 | 0.3207 | -89.3% | 0.8628      | 2.6149 | -0.0403 | -101.5% | -0.1088     | 5.8379 | -0.0018 | -100.0% | -0.0373     | 2.9996  | 0.1663 | -94.5% | 0.4296      |
| $X_3$                                                                                                                                            | 0.4916 | 0.5129 | 4.3%   | 0.5181      | 0.3863 | 0.3117  | -19.3%  | 0.3109      | 0.5676 | 0.4549  | -19.9%  | 0.4543      | 0.4990  | 0.5057 | 1.3%   | 0.5095      |
| Scenario (3): $X_2 \sim \text{Bernoulli}(0.5)$ , $M_{00} = 0.6$ , and $M_{11} = 0.5$ , $X_1 \sim \text{Bernoulli}(0.5)$ , $X_3 \sim N(0, 2^2)$   |        |        |        |             |        |         |         |             |        |         |         |             |         |        |        |             |
| $C$                                                                                                                                              | 0.9790 | 2.3719 | 142.3% | 2.1562      | 0.9981 | 1.7457  | 74.9%   | 1.6467      | 1.0609 | 1.4119  | 33.1%   | 1.2864      | 0.9810  | 3.3139 | 237.8% | 3.2728      |
| $X_1$                                                                                                                                            | 1.9973 | 1.9051 | -4.6%  | 1.9077      | 2.1923 | 1.9577  | -10.7%  | 1.9618      | 1.8652 | 1.3645  | -26.8%  | 1.3820      | 2.0080  | 2.0007 | -0.4%  | 2.0021      |
| $X_2$                                                                                                                                            | 3.0134 | 0.2886 | -90.4% | 0.7730      | 2.8000 | 0.1320  | -95.3%  | 0.3522      | 3.0025 | 0.2089  | -93.0%  | 0.5235      | 3.0112  | 0.0609 | -98.0% | 0.1546      |
| $X_3$                                                                                                                                            | 0.5002 | 0.4763 | -4.8%  | 0.4750      | 0.5351 | 0.4603  | -14.0%  | 0.4608      | 0.4964 | 0.3426  | -31.0%  | 0.3463      | 0.5012  | 0.5016 | 0.1%   | 0.5004      |
| Scenario (3): $X_2 \sim \text{Bernoulli}(0.5)$ , $M_{00} = 0.6$ , and $M_{11} = 0.5$ , $X_1 \sim \text{Bernoulli}(0.7)$ , $X_3 \sim N(0, 0.5^2)$ |        |        |        |             |        |         |         |             |        |         |         |             |         |        |        |             |
| $C$                                                                                                                                              | 1.0065 | 2.4210 | 140.5% | 2.1554      | 0.8864 | 1.6461  | 85.7%   | 1.4817      | 1.0602 | 1.3467  | 27.0%   | 1.1662      | 0.9964  | 3.2695 | 228.1% | 3.1216      |
| $X_1$                                                                                                                                            | 2.0086 | 1.9143 | -4.7%  | 1.9185      | 2.1753 | 1.9694  | -9.5%   | 1.9824      | 2.1403 | 1.9459  | -9.1%   | 1.9848      | 2.0053  | 2.0062 | 0.0%   | 2.0083      |
| $X_2$                                                                                                                                            | 2.9746 | 0.3540 | -88.1% | 0.9464      | 2.9575 | 0.2365  | -92.0%  | 0.6123      | 3.0909 | 0.2488  | -92.2%  | 0.6965      | 2.9957  | 0.1832 | -93.9% | 0.4856      |
| $X_3$                                                                                                                                            | 0.5090 | 0.4490 | -11.8% | 0.4541      | 0.5308 | 0.4005  | -24.6%  | 0.4158      | 0.5468 | 0.4840  | -11.5%  | 0.5086      | 0.4972  | 0.5419 | 9.0%   | 0.5352      |
| Scenario (3): $X_2 \sim \text{Bernoulli}(0.5)$ , $M_{00} = 0.6$ , and $M_{11} = 0.5$ , $X_1 \sim \text{Bernoulli}(0.7)$ , $X_3 \sim N(0, 1^2)$   |        |        |        |             |        |         |         |             |        |         |         |             |         |        |        |             |
| $C$                                                                                                                                              | 1.0074 | 2.4538 | 143.6% | 2.2458      | 0.9541 | 1.6838  | 76.5%   | 1.5118      | 1.0232 | 1.4159  | 38.4%   | 1.3682      | 1.0069  | 3.2909 | 226.8% | 3.1562      |
| $X_1$                                                                                                                                            | 1.9936 | 1.9133 | -4.0%  | 1.9043      | 1.9644 | 1.7896  | -8.9%   | 1.8047      | 2.0105 | 1.7130  | -14.8%  | 1.7122      | 1.9922  | 1.9669 | -1.3%  | 1.9674      |
| $X_2$                                                                                                                                            | 2.9876 | 0.3027 | -89.9% | 0.7994      | 2.9658 | 0.2410  | -91.9%  | 0.6283      | 2.8228 | 0.0627  | -97.9%  | 0.1709      | 3.0005  | 0.1820 | -93.9% | 0.4648      |
| $X_3$                                                                                                                                            | 0.4998 | 0.4878 | -2.4%  | 0.4920      | 0.5312 | 0.4544  | -14.5%  | 0.4594      | 0.4709 | 0.3539  | -24.8%  | 0.3534      | 0.5010  | 0.5166 | 3.1%   | 0.5148      |
| Scenario (3): $X_2 \sim \text{Bernoulli}(0.5)$ , $M_{00} = 0.6$ , and $M_{11} = 0.5$ , $X_1 \sim \text{Bernoulli}(0.7)$ , $X_3 \sim N(0, 2^2)$   |        |        |        |             |        |         |         |             |        |         |         |             |         |        |        |             |
| $C$                                                                                                                                              | 0.9874 | 2.3311 | 136.1% | 2.1588      | 0.9784 | 1.7639  | 80.3%   | 1.6064      | 0.9772 | 1.3955  | 42.8%   | 1.3020      | 0.9905  | 3.2760 | 230.7% | 3.1935      |
| $X_1$                                                                                                                                            | 2.0081 | 2.0495 | 2.1%   | 2.0521      | 1.7924 | 1.5674  | -12.6%  | 1.5742      | 2.2613 | 1.7444  | -22.9%  | 1.7547      | 2.0025  | 2.0182 | 0.8%   | 2.0251      |
| $X_2$                                                                                                                                            | 3.0032 | 0.2166 | -92.8% | 0.5792      | 3.1735 | 0.2152  | -93.2%  | 0.5785      | 2.5797 | 0.1174  | -95.4%  | 0.3208      | 3.0075  | 0.1089 | -96.4% | 0.2789      |
| $X_3$                                                                                                                                            | 0.4976 | 0.5097 | 2.4%   | 0.5093      | 0.4605 | 0.4016  | -12.8%  | 0.4010      | 0.5255 | 0.4024  | -23.4%  | 0.4038      | 0.4995  | 0.4967 | -0.6%  | 0.4983      |
